# Supplementary material for: Diagnosis and Detection of Sarcoidosis. An Official American Thoracic Society Clinical Practice Guideline
Source: PubMed Central journal article supplement — Am J Respir Crit Care Med. 2020 Apr 15;201(8):e26–51. doi: 10.1164/rccm.202002-0251ST (PMC7159433; doi:10.1164/rccm.202002-0251st), 2020-04-15
Supplement: rccm.202002-0251ST_ats_guideline_data_supplement.pdf [file rccm.202002-0251ST_ats_guideline_data_supplement.pdf]

# DIAGNOSIS AND DETECTION OF SARCOIDOSIS

## An Official American Thoracic Society Clinical Practice Guideline

### ONLINE SUPPLEMENT

Elliott D. Crouser MD<sup>\*,1</sup>, Lisa A. Maier MD<sup>\*,2</sup>, Kevin C. Wilson MD<sup>\*,3</sup>, Catherine A. Bonham MD<sup>4</sup>, Adam S. Morgenthau MD<sup>5</sup>, Karen C. Patterson MD<sup>6,7</sup>, Eric Abston MD<sup>3</sup>, Richard C. Bernstein MD<sup>8</sup>, Ron Blankstein MD<sup>9</sup>, Edward S. Chen MD<sup>10</sup>, Daniel A. Culver DO<sup>11</sup>, Wonder Drake MD<sup>12</sup>, Marjolein Drent MD<sup>13</sup>, Alicia K. Gerke MD<sup>14</sup>, Michael Ghobrial MD<sup>11</sup>, Praveen Govender MD<sup>3</sup>, Nabeel Hamzeh MD<sup>14</sup>, W. Ennis James MD<sup>15</sup>, Marc A. Judson MD<sup>16</sup>, Liz Kellermeyer MSLS<sup>17</sup>, Shandra Knight MSLS<sup>17</sup>, Laura L. Koth MD<sup>18</sup>, Venerino Poletti MD<sup>19</sup>, Subha V. Raman MD<sup>20</sup>, Melissa H. Tukey MD<sup>21</sup>, Gloria E. Westney MD<sup>22</sup>, and Robert P. Baughman MD<sup>\*,23</sup> on behalf of the ATS Assembly on Clinical Problems.

\* Co-first authors, \*Co-chairs of the Clinical Practice Guidelines Panel

#### **Affiliations:**

<sup>1</sup> Division of Pulmonary, Critical Care, & Sleep Medicine, The Ohio State University, Columbus, OH

<sup>2</sup> Division of Environmental & Occupational Health, National Jewish Health, Denver, CO

<sup>3</sup> Division of Pulmonary, Allergy, Sleep, & Critical Care Medicine, Boston University School of Medicine, Boston, MA

<sup>4</sup> Division of Pulmonary & Critical Care Medicine, University of Virginia, Charlottesville, VA,

<sup>5</sup> Division of Pulmonary, Critical Care, & Sleep Medicine, Icahn School of Medicine at Mount Sinai, New York, NY

<sup>6</sup> Division of Pulmonary, Allergy, & Critical Care Medicine, University of Pennsylvania, Philadelphia, PA

<sup>7</sup> Brighton and Sussex Medical School, Brighton, England

<sup>8</sup> Division of Pulmonary, Allergy, & Critical Care Medicine, Penn State University, Hershey, PA

<sup>9</sup> Division of Cardiovascular Medicine, Brigham and Women's Hospital, Harvard Medical School, Boston, MA

<sup>10</sup> Division of Pulmonary & Critical Care Medicine, Johns Hopkins Medical School, Baltimore, MD

<sup>11</sup> Department of Medicine, Respiratory Institute, Cleveland Clinic, Cleveland, OH

<sup>12</sup> Division of Infectious Diseases, Vanderbilt University, Nashville, TN

<sup>13</sup> ILD Center of Excellence, Department of Pulmonology, St. Antonius Hospital, Nieuwegein, the Netherlands & Department of Toxicology and Pharmacology, FHML, University Maastricht, the Netherlands

<sup>14</sup> Division of Pulmonary, Critical Care, & Occupational Medicine, University of Iowa, Iowa City, IA

<sup>15</sup> Division of Pulmonary, Critical Care, Allergy, & Sleep Medicine, Medical University of South Carolina, Charleston, SC

<sup>16</sup> Division of Pulmonary Medicine, Albany Medical College, Albany, NY

<sup>17</sup> Library and Knowledge Services, National Jewish Health, Denver, CO

<sup>18</sup> Division of Pulmonary & Critical Care Medicine, University of California, San Francisco, CA  
<sup>19</sup> Department of Diseases of the Thorax, Morgagni Hospital. Forli, Italy and Department of Respiratory Diseases & Allergy, Aarhus University Hospital, Aarhus, Denmark

<sup>20</sup> Division of Cardiovascular Medicine, The Ohio State University, Columbus OH

<sup>21</sup> Kaiser Permanente Northern California, Oakland, CA

<sup>22</sup> Division of Pulmonary & Critical Care Medicine, Morehouse School of Medicine, Atlanta, GA

<sup>23</sup> Department of Medicine, University of Cincinnati Medical Center, Cincinnati, OH

## **TABLE OF CONTENTS**

### **Methods**

- Panel composition
- Questions
- Literature search
- Evidence synthesis
- Recommendations
- Manuscript preparation
- Peer review
- Updating
- References

### **Implications of the strength of a recommendation**

#### **Question 1: Lymph node sampling for asymptomatic bilateral hilar lymphadenopathy**

- Search strategy
- Approach
- Selected studies with outcomes
- Meta-analysis Forest plots
- Markov model
- Evidence profile

#### **Question 2: EBUS-guided sampling versus mediastinoscopy for suspected sarcoidosis**

- Search strategy
- Approach
- Selected studies with outcomes
- Meta-analysis Forest plots
- Markov model
- Evidence profile

#### **Question 3: Screening eye examination**

- Search strategy
- Approach
- Selected studies with outcomes
- Meta-analysis Forest plots

Markov model  
Evidence profile

**Question 4: Screening renal function testing**

Search strategy  
Approach  
Selected studies with outcomes  
Meta-analysis Forest plots  
Markov model  
Evidence profile

**Question 5: Screening liver function testing**

Search strategy  
Approach  
Selected studies with outcomes  
Meta-analysis Forest plots  
Markov model  
Evidence profile

**Question 6: Screening calcium and vitamin D testing**

Search strategy  
Approach  
Selected studies with outcomes  
Meta-analysis Forest plots  
Markov model  
Evidence profile

**Question 7: Screening complete cell counts**

Search strategy  
Approach  
Selected studies with outcomes  
Meta-analysis Forest plots  
Markov model  
Evidence profile

**Question 8: Screening for cardiac sarcoidosis (electrocardiography, transthoracic echocardiography, and 24-hour electrocardiography [Holter] monitoring)**

Search strategy  
Approach  
Selected studies with outcomes  
Meta-analysis Forest plots  
Markov model  
Evidence profiles

**Question 9: Diagnostic evaluation of suspected cardiac sarcoidosis (cardiac MRI, PET scanning, and transthoracic echocardiography)**

Search strategy  
Approach  
Selected studies with outcomes  
Meta-analysis Forest plots  
Markov model  
Evidence profiles

### **Question 10: Echocardiography for suspected pulmonary hypertension**

Search strategy  
Approach  
Selected studies with outcomes  
Meta-analysis Forest plots  
Markov model  
Evidence profiles

## **METHODS**

### **Panel Composition**

The project was proposed by one of the co-chairs (EDC) through an application to the American Thoracic Society (ATS). The project formally commenced January 1, 2018. The co-chairs (EDC, RPB, LAM) identified potential panelists based on their expertise in the investigation and clinical management of sarcoidosis. The committee was diverse with respect to gender, specialties and disciplines, level of seniority, and geographical locations; in addition, a patient representative provided perspective on patient values and preferences. All potential panelists disclosed their conflicts of interest, which were vetted and managed according to the policies and procedures of the ATS. The final panel was approved by the ATS.

### **Questions**

The co-chairs and lead methodologist (KCW) drafted key clinical questions in a PICO (Population, Intervention, Comparator, and Outcome) format. The questions were revised, and additional questions were proposed via a series of electronic surveys. Further discussion,

modification, and approval was performed by the full guideline panel at a face-to-face meeting held at the 2018 ATS International Conference in San Diego, California in May 2018.

### **Literature search**

The published literature was searched by the librarian (SK) in the following databases: Medline, Excerpta Medica Database (EMBASE), and Cochrane Database of Systematic Reviews. Searching was conducted in June 2018 by the librarian and then a targeted updated was performed in April 2019 by the lead methodologist (KCW). The methodology team (KCW, MG, PG, MHT) reviewed all publications retrieved from the literature searches, initially screening based on title and/or abstract and then reviewing the full text of potentially relevant publications. Bibliographies of selected studies and relevant systematic reviews were also reviewed.

### **Evidence synthesis**

Findings from relevant publications were extracted into data tables. When data were amenable to weighted pooling (i.e., meta-analysis), a random effects model was implemented in the Cochrane Collaboration Review Manager, version 5.3. For controlled studies, relative risk (RR) was used to report dichotomous outcomes and the mean difference (MD) was used to report continuous outcomes. For uncontrolled studies, proportion was estimated using generic inverse; in cases when generic inverse variance could not be used, data was pooled without weighting. Regardless of the approach used to pool individual studies, the accompanying 95% confidence interval (CI) was determined. Statistical heterogeneity was measured using the  $I^2$  test; an  $I^2 \geq 75\%$ , 50-75%, and 25-50% was considered severe, moderate, and mild heterogeneity,

respectively. When heterogeneity was encountered, sensitivity analyses were initially performed to identify contributors and, if indicated, subgroup analyses and meta-regression was performed. No cause was usually found, so we eliminated outliers and the resulting estimates were presented to the committee to inform their discussion and judgements. Results are provided in the evidence tables.

The Grading, Recommendations, Assessment, Development, and Evaluation (GRADE) approach was used to assess certainty in the estimated effects (i.e., the quality of evidence) for each intervention on each outcome of interest (1). The methodologist created evidence profiles using the Guideline Development Tool (2), which categorized the overall certainty in the evidence into one of four levels: high, moderate, low, or very low. Each level represents the certainty in the accuracy of the estimated effects for a specific intervention. The full guideline panel reviewed the evidence profiles and provided input and feedback.

## **Recommendations**

The methodology team presented the completed evidence syntheses to subcommittees via webinars, during which the evidence was discussed. Following each webinar, the subcommittees made conclusions and formulated and rated recommendations by email and teleconferences. The panelists made decisions about whether to recommend for or against an intervention based on: the balance of desirable consequences (benefits) and undesirable consequences (burdens, adverse effects, and costs), quality of evidence, feasibility, and acceptability to patients (i.e., patient values and preferences). Using the GRADE approach, each recommendation was rated as either “strong” or “conditional”. Best practice statements were made when it was concluded that there was no appropriate alternative course of action. The full guideline panel met at the 2019 ATS

Conference in Dallas, Texas in May 2019. Evidences syntheses and subcommittee conclusions and recommendations were presented to the full guideline panel, which was followed by discussion, revisions, and approvals.

### **Manuscript preparation**

The initial draft of the manuscript was written by the co-chairs (EDC, RPB, LAM) and lead methodologist (KCW). All members of the guideline panel reviewed the manuscript; comments were addressed by the co-chairs and then incorporated into the revised manuscript. The manuscript was redistributed to the full panel for further review. The final product was the result of collective work from all co-chairs, panelists, and methodologists. Once the manuscript was approved by the full panel, it was submitted for external peer review.

### **Peer review**

Peer review was overseen by the ATS Documents Editor. The guideline was peer reviewed by four content experts and a guideline methodologist. Following several cycles of review and revisions, the manuscript was deemed satisfactory and sent to the AT Board of Directors for further review and final approval.

### **Updating**

The guideline will be reviewed by the ATS' Clinical Problems Assembly within five years. If one or more questions is deemed in need of an update, or related new questions need answered, a new task force will be approved to develop an updated guideline. Otherwise, the

resources will be redirected toward developing a guideline on an alternative interstitial lung disease-related topic.

### **Methods references:**

1. Schunemann HJ, Jaeschke R, Cook DJ, Bria WF, El-Solh AA, Ernst A, Fahy BF, Gould MK, Horan KL, Krishnan JA, et al. An Official ATS Statement: Grading the Quality of Evidence and Strength of Recommendations in ATS Guidelines and Recommendations. *Am J Respir Crit Care Med* 2006; 174:605-614.
2. GRADEpro GDT: GRADEpro Guideline Development Tool [Software]. McMaster University, 2015 (developed by Evidence Prime, Inc.). Available from [gradepro.org](http://gradepro.org).

### **IMPLICATIONS OF THE STRENGTH OF A RECOMMENDATION**

The strength of a recommendation can be conceptualized in several ways. First, a **strong** recommendation conveys that the recommended course of action is the appropriate in >95% of patients, whereas a **conditional** recommendation conveys that the recommended course of action is appropriate in >50% of patients but may not be appropriate in a sizeable minority. Second, a **strong** recommendation conveys “just do it”, whereas a **conditional** recommendation conveys “slow down, think about it, discuss it”. Third, **strong** recommendation also conveys that criticism may be warranted if the recommended course of action is not followed, whereas a **conditional** recommendation conveys that a decision to not follow the recommended course of action may be a matter of style or equipoise. Finally, a **strong** recommendation is often the basis of a performance measure, whereas **conditional** recommendations seldom make reasonable performance measures.



**TABLE: Implications of strong and conditional recommendations**

|                          | <b>Strong Recommendation</b><br>("We recommend . . .")                                                                                                                                                                                                                                                                                                 | <b>Conditional Recommendation</b><br>("We suggest . . .")                                                                                                                                                                                                                                                                                                                              |
|--------------------------|--------------------------------------------------------------------------------------------------------------------------------------------------------------------------------------------------------------------------------------------------------------------------------------------------------------------------------------------------------|----------------------------------------------------------------------------------------------------------------------------------------------------------------------------------------------------------------------------------------------------------------------------------------------------------------------------------------------------------------------------------------|
| <b>For patients</b>      | The overwhelming majority of individuals in this situation would want the recommended course of action and only a small minority would not.                                                                                                                                                                                                            | The majority individuals in this situation would want the suggested course of action, but a sizeable minority would not.                                                                                                                                                                                                                                                               |
| <b>For clinicians</b>    | The overwhelming majority of individuals should receive the recommended course of action. Adherence to this recommendation according to the guideline could be used as a quality criterion or performance indicator. Formal decision aids are not likely to be needed to help individuals make decisions consistent with their values and preferences. | Different choices will be appropriate for different patients and you must help each patient arrive at a management decision consistent with her or his values and preferences. Decision aids may be useful to help individuals make decisions consistent with their values and preferences. Clinicians should expect to spend more time with patients when working towards a decision. |
| <b>For policy makers</b> | The recommendation can be adapted as policy in most situations including for the use as performance indicators.                                                                                                                                                                                                                                        | Policy-making will require substantial debates and involvement of many stakeholders. Policies are also more likely to vary between regions. Performance indicators would have to focus on the fact that adequate deliberation about the management options has taken place.                                                                                                            |

**QUESTION #1: Should a lymph node biopsy be performed in a patient presenting with asymptomatic bilateral hilar lymphadenopathy?**

**Search strategy**

| #  | Searches                                                                                                           |
|----|--------------------------------------------------------------------------------------------------------------------|
| 1  | lymphadenopathy/                                                                                                   |
| 2  | ((enlarg\$ or swollen) adj2 lymph node\$).mp.                                                                      |
| 3  | (Hilar adj3 (lymph\$ or adenopath\$)).mp.                                                                          |
| 4  | (Bilateral adj3 (hilar or lymph\$ or adenopath\$)).mp.                                                             |
| 5  | or/1-4 [lymphadenopathy]                                                                                           |
| 6  | lymph node biopsy/<br>(lymph\$ adj2 (tissue\$ or node\$ or gland\$) adj2 (biops\$ or puncture\$ or aspirat\$)).mp. |
| 7  | aspirat\$).mp.                                                                                                     |
| 8  | 6 or 7 [biopsy]                                                                                                    |
| 9  | 5 and 8                                                                                                            |
| 10 | exp sarcoidosis/                                                                                                   |
| 11 | sarcoidosis/                                                                                                       |
| 12 | sarcoid\$.mp.                                                                                                      |
| 13 | (besnier adj boeck\$).tw.                                                                                          |

|    |                                                      |
|----|------------------------------------------------------|
| 14 | (boeck\$ adj (disease or sarcoid)).tw.               |
| 15 | (schaumann\$ adj (disease or syndrome)).tw.          |
| 16 | uveoparoti\$.tw.                                     |
| 17 | (benign\$ adj lymphogranuloma\$).tw.                 |
| 18 | ((junging or heerfordt or lofgren) adj syndrome).tw. |
| 19 | neurosarcoidosis.tw.                                 |
| 20 | (lupus adj pernio).tw.                               |
| 21 | (idiopathic adj3 inflammat\$ adj3 granulomat\$).tw.  |
| 22 | or/13-24 [sarcoidosis]                               |
| 23 | 9 and 22                                             |

### Flow of information

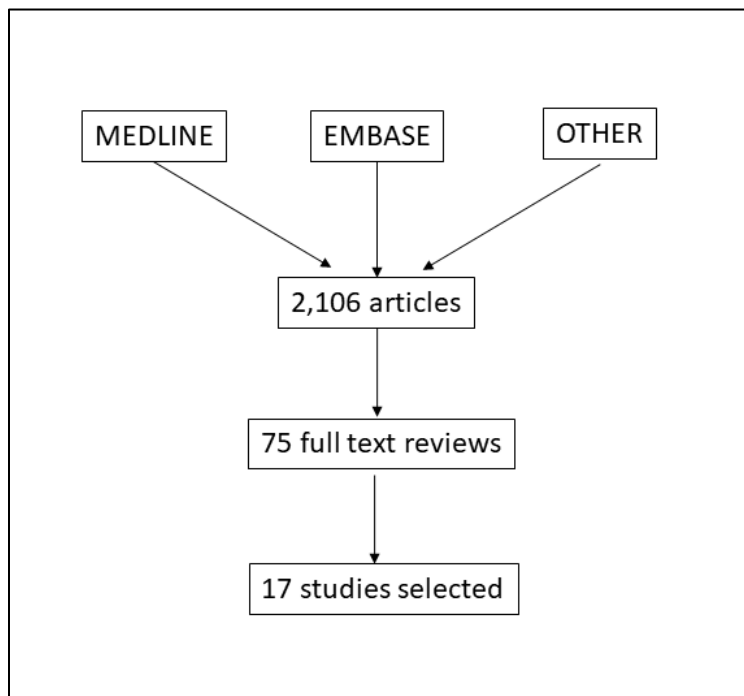

### Approach

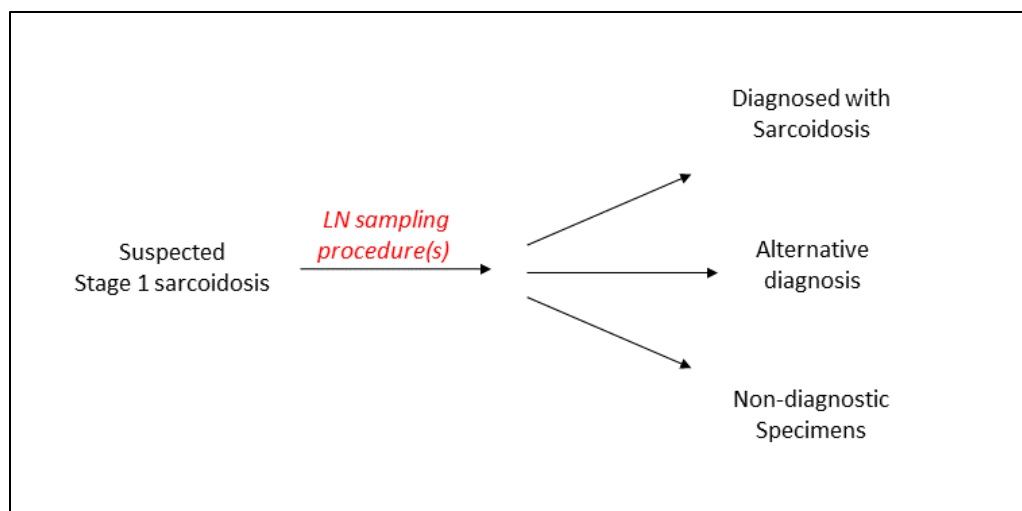

Note: In contrast to the approach taken for PICO 2, we assumed that the all procedures alone or in combination yielded adequate samples

## Selected studies with outcomes

### Diagnostic findings

| Study                    | Size, N    | Procedure                  | Sarcoidosis confirmed | Alternative diagnosis | Alternative diagnoses                                                 | Non-diagnostic evaluation |
|--------------------------|------------|----------------------------|-----------------------|-----------------------|-----------------------------------------------------------------------|---------------------------|
| Boujaoude 2012*          | 78         | EBUS-TBNA                  | 56/78 (72%)           | 14/78 (18%)           | Lymphoma 8 cases, malignant other 1 case, non-malignant other 5 cases | NR                        |
| Fritscher-Ravens 2000    | 12         | EUS-FNA                    | 11/12 (92%)           | 1/12 (8%)             | Tuberculosis (1)                                                      | 0/12 (0%)                 |
| Garwood 2007             | 32         | EBUS-TBNA                  | 30/32 (94%)           | 0/32 (0%)             | N/A                                                                   | 2/32 (6%)                 |
| Hong 2013                | 11         | EBUS-TBNA, TBBX, EBBX, BAL | 9/11 (82%)            | NR                    | NR                                                                    | NR                        |
| Iwashita 2008            | 41         | EUS-FNA                    | 35/41 (85%)           | 1/41 (2%)             | Lymphoma (1)                                                          | 5/41 (12%)                |
| Koerner 1975             | 10         | TBBX                       | 7/10 (70%)            | 2/10 (20%)            | Tuberculosis (1), Pulmonary embolism (1)                              | 1/10 (10%)                |
| Koonitz 1976             | 20         | TBBX                       | 18/20 (90%)           | 0/20 (0%)             | N/A                                                                   | 2/20 (10%)                |
| Leonard 1997             | 5          | TBBX, TBNA, BAL            | 3/5 (60%)             | 1/5 (20%)             | Lymphoma (1)                                                          | 1/5 (20%)                 |
| Oki 2007                 | 11         | EBUS-TBNA                  | 11/11 (100%)          | 0/11 (0%)             | N/A                                                                   | 0/11 (0%)                 |
| Oki 2012                 | 44         | EBUS-TBNA, TBBX            | 37/44 (84%)           | NR                    | NR                                                                    | NR                        |
| Oki 2013                 | 18         | EUS-FNA                    | 17/18 (94%)           | NR                    | NR                                                                    | NR                        |
| Oki 2018                 | 58         | EBUS-TBNA                  | 47/58 (81%)           | NR                    | NR                                                                    | NR                        |
| Pakhale 2006             | 55         | Mediastinoscopy            | 49/55 (89%)           | 1/55 (1.8%)           |                                                                       | 1/55 (2%)                 |
| Pauli 1984               | 152        | TBNA                       | 121/152 (80%)         | 0/152 (0%)            | N/A                                                                   | 31/152 (20%)              |
| Ribeiro 2014             | 27         | EBUS-TBNA                  | 21/27 (28%)           | 2/27 (7.4%)           | Tuberculosis (1), Non-tuberculous mycobacterium (1)                   | 1/27 (4%)                 |
| Trisolini 2004           | 17         | TBNA, TBBX                 | 17/17 (100%)          | 0/17 (0%)             | N/A                                                                   | 0/17 (0%)                 |
| Yanardag 2006**          | 43         | Mediastinoscopy            | 42/43 (98%)           | 0/43 (0%)             | N/A                                                                   | 1/43 (2.3%)               |
| <i>Pooled (weighted)</i> | <i>N/A</i> | <i>N/A</i>                 | <i>Not estimable</i>  | <i>Not estimable</i>  | <i>N/A</i>                                                            | <i>Not estimable</i>      |

|                            |     |     |                                                |                                           |     |                                              |
|----------------------------|-----|-----|------------------------------------------------|-------------------------------------------|-----|----------------------------------------------|
| <i>Pooled (unweighted)</i> | 556 | N/A | <u>475/556 (85.4%)</u><br>(95% CI 82.2- 88.3%) | <u>8/425 (1.9%)</u><br>(95% CI 1.0- 3.7%) | N/A | <u>45/425 (10.6%)</u><br>(95% CI 7.8- 13.9%) |
| <i>Median (range)</i>      | N/A | N/A | 87.2% (60.0-100%)                              | 0.9% (0- 20.0%)                           | N/A | 5.0% (0- 20.4%)                              |

NR= not reported, N/A= not applicable

\* Study was selected because it met selection criteria but was excluded from the analysis as an outlier.

\*\*Assumed 1 patient in the entire cohort who had a non-diagnostic mediastinoscopy was stage 1.

## Complications

| Study                      | Mortality                                     | Major bleeding                                | Pneumo-<br>thorax                             | Other                                             |
|----------------------------|-----------------------------------------------|-----------------------------------------------|-----------------------------------------------|---------------------------------------------------|
| Boujaoude 2012*            | 0/60 (0%)                                     | 0/60 (0%)                                     | 0/60 (0%)                                     | 0/60 (0%)                                         |
| Fritscher-Ravens 2000      | 0/12 (0%)                                     | 0/12 (0%)                                     | 0/12 (0%)                                     | 0/12 (0%)                                         |
| Garwood 2007               | 0/32 (0%)                                     | 0/32 (0%)                                     | 0/32 (0%)                                     | 0/32 (0%)                                         |
| Hong 2013                  | 0/11 (0%)                                     | 0/11 (0%)                                     | NR                                            | 0/11 (0%)                                         |
| Iwashita 2008              | 0/41 (0%)                                     | 0/41 (0%)                                     | 0/41 (0%)                                     | 1/41 (2%) - mediastinitis                         |
| Koerner 1975               | 0/10 (0%)                                     | 0/10 (0%)                                     | NR                                            | 0/10 (0%)                                         |
| Koonitz 1976               | 0/20 (0%)                                     | 0/20 (0%)                                     | NR                                            | 0/20 (0%)                                         |
| Leonard 1997               | 0/5 (0%)                                      | 0/5 (0%)                                      | 0/5 (0%)                                      | 0/5 (0%)                                          |
| Oki 2007                   | 0/11 (0%)                                     | 0/11 (0%)                                     | 0/11 (0%)                                     | 0/11 (0%)                                         |
| Oki 2012                   | 0/44 (0%)                                     | 0/44 (0%)                                     | NR                                            | 0/44 (0%)                                         |
| Oki 2013                   | 0/18 (0%)                                     | 0/18 (0%)                                     | 0/18 (0%)                                     | 0/18 (0%)                                         |
| Oki 2018                   | 0/58 (0%)                                     | 0/58 (0%)                                     | 0/58 (0%)                                     | 0/58 (0%)                                         |
| Pakhale 2006               | NR                                            | NR                                            | NR                                            | NR                                                |
| Pauli 1984                 | 0/152 (0%)                                    | 0/152 (0%)                                    | 0/152 (0%)                                    | 0/152 (0%)                                        |
| Ribeiro 2014               | 0/27 (0%)                                     | 0/27 (0%)                                     | 0/27 (0%)                                     | 0/27 (0%)                                         |
| Trisolini 2004             | 0/17 (0%)                                     | 0/17 (0%)                                     | 0/17 (0%)                                     | 0/17 (0%)                                         |
| Yanardag 2006*             | 0/43 (0%)                                     | 0/43 (0%)                                     | 0/43 (0%)                                     | 0/43 (0%)                                         |
| <i>Pooled (weighted)</i>   | <i>Not estimable</i>                          | <i>Not estimable</i>                          | <i>Not estimable</i>                          | <i>Not estimable</i>                              |
| <i>Pooled (unweighted)</i> | <i>0/501 (0%)</i><br><i>(95% CI 0- 0.01%)</i> | <i>0/501 (0%)</i><br><i>(95% CI 0- 0.01%)</i> | <i>0/232 (0%)</i><br><i>(95% CI 0- 0.02%)</i> | <i>1/501 (0.001%)</i><br><i>(95% CI 0- 0.01%)</i> |
| <i>Median (range)</i>      | <i>0% (0- 0%)</i>                             | <i>0% (0- 0%)</i>                             | <i>0% (0- 0%)</i>                             | <i>0% (0- 2.4%)</i>                               |

NR= not reported

\* Study was selected because it met selection criteria but was excluded from the analysis as an outlier.

## Meta-analysis Forest plots

None. Studies without control groups require Generic Inverse Variance for meta-analysis, which cannot be used if individual studies yield 0% or 100%. Thus, studies underwent only unweighted pooling instead.

## Markov model

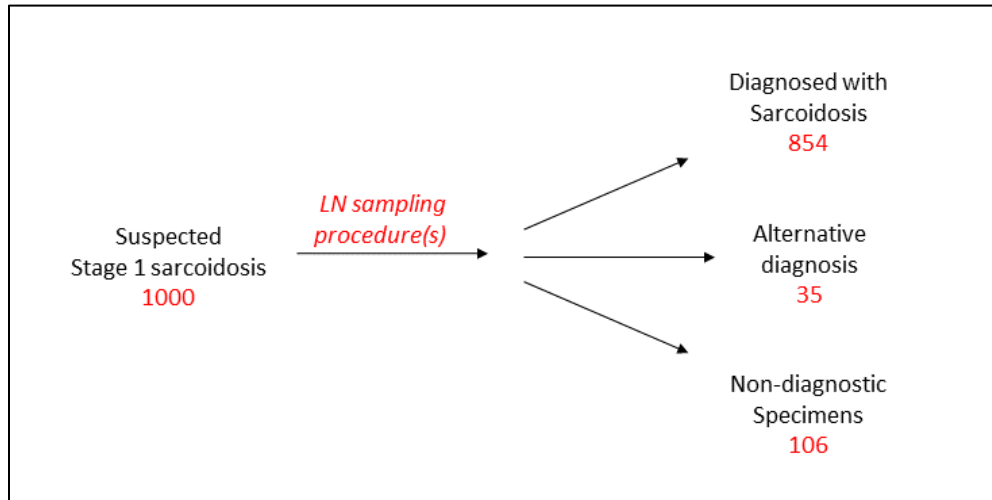

## Evidence profile

**Comparison:** Lymph node sampling versus no lymph node sampling

### Bibliography:

1. Boujaoude Z, et al. Endobronchial ultrasound with transbronchial needle aspiration in the diagnosis of bilateral hilar and mediastinal lymphadenopathy. *J Bronchology and Interv Pulmonology* 2012; 19(1):19-23.<sup>1</sup>
2. Fritscher-Ravens, A., et al. (2000). "Diagnosing sarcoidosis using endosonography-guided fine-needle aspiration." *Chest* 118(4): 928-935.
3. Garwood S, et al. Endobronchial ultrasound for the diagnosis of pulmonary sarcoidosis. *CHEST* 2007; 132(4):1298-1304.
4. Hong G. et al. Usefulness of Endobronchial Ultrasound guided transbronchial needle aspiration for diagnosis of sarcoidosis. *Yonsei Med J* 2013;5(4)6:1416-1421
5. Iwashita, T., et al. (2008). "The yield of endoscopic ultrasound-guided fine needle aspiration for histological diagnosis in patients suspected of stage I sarcoidosis." *Endoscopy* 40(5): 400-405.
6. Koerner, S. K., et al. (1975). "Transbronchial lung biopsy for the diagnosis of sarcoidosis." *N Engl J Med* 293(6): 268-270.
7. Koonitz, C. H., et al. (1976). "Transbronchial lung biopsy via the fiberoptic bronchoscope in sarcoidosis." *Ann Intern Med* 85(1): 64-66
8. Leonard, C., et al. (1997). "Bronchoscopic diagnosis of sarcoidosis." *European Respiratory Journal* 10(12): 2722-2724.
9. Oki, M., et al. (2007). "Real-time endobronchial ultrasound-guided transbronchial needle aspiration is useful for diagnosing sarcoidosis." *Respirology* 12(6): 863-868.
10. Pakhale SS et al. Has mediastinoscopy still a role in suspected stage I sarcoidosis? *Sarcoidosis Vasculitis & Diffuse Lung Diseases*. 2006;23(1)66-69.
11. Pauli, G., et al. (1984). "Transbronchial needle aspiration in the diagnosis of sarcoidosis." *Chest* 85(4): 482-484.
12. Ribeiro, C., et al. (2014). "Diagnosis of sarcoidosis in the endobronchial ultrasound-guided transbronchial needle aspiration era." *Revista Portuguesa de Pneumologia* 20(5): 237-241.
13. Trisolini, R., et al. (2004). "Transbronchial needle aspiration improves the diagnostic yield of bronchoscopy in sarcoidosis." *Sarcoidosis Vasculitis & Diffuse Lung Diseases* 21(2): 147-151.
14. Oki, M., et al. (2012). "Prospective study of endobronchial ultrasound-guided transbronchial needle aspiration of lymph nodes versus transbronchial lung biopsy of lung tissue for diagnosis of sarcoidosis." *Journal of Thoracic & Cardiovascular Surgery* 143(6): 1324-1329.
15. Oki, M., et al. (2013). "Transesophageal bronchoscopic ultrasound-guided fine needle aspiration for diagnosis of sarcoidosis." *Respiration* 85(2): 137-143.
16. Oki, M., et al. (2018). "How Many Passes Are Needed for Endobronchial Ultrasound-Guided Transbronchial Needle Aspiration for Sarcoidosis? A Prospective Multicenter Study." *Respiration* 95(4): 251-257.
17. Yanardag, H., et al. (2006). "Clinical value of mediastinoscopy in the diagnosis of sarcoidosis: an analysis of 68 cases." *Thoracic & Cardiovascular Surgeon* 54(3): 198-201.
17. Yanardag, H., et al. (2006). "Clinical value of mediastinoscopy in the diagnosis of sarcoidosis: an analysis of 68 cases." *Thoracic & Cardiovascular Surgeon* 54(3): 198-201.

| Quality assessment | Effect | Quality | Importance |
|--------------------|--------|---------|------------|
|--------------------|--------|---------|------------|

| No of studies                      | Design      | Risk of bias         | Inconsistency        | Indirectness | Imprecision       | Other considerations |                                               |          |     |
|------------------------------------|-------------|----------------------|----------------------|--------------|-------------------|----------------------|-----------------------------------------------|----------|-----|
| <b>Confirmed sarcoidosis (%)</b>   |             |                      |                      |              |                   |                      |                                               |          |     |
| 16 <sup>2</sup>                    | Case series | Serious <sup>3</sup> | Serious <sup>4</sup> | None         | None <sup>5</sup> | None                 | 475/556 (85.4%)<br>(95% CI 82.2- 88.3%)       | VERY LOW | TBD |
| <b>Alternative diagnoses (%)</b>   |             |                      |                      |              |                   |                      |                                               |          |     |
| 12 <sup>6</sup>                    | Case series | Serious <sup>3</sup> | Serious <sup>4</sup> | None         | None <sup>5</sup> | None                 | 15/425 (3.5%)<br>(95% CI 2.0- 5.8%)           | VERY LOW | TBD |
| <b>Non-diagnostic sampling (%)</b> |             |                      |                      |              |                   |                      |                                               |          |     |
| 12 <sup>6</sup>                    | Case series | Serious <sup>3</sup> | Serious <sup>4</sup> | None         | None <sup>5</sup> | None                 | 45/425 (10.6%)<br>(95% CI 7.8- 13.9%)         | VERY LOW | TBD |
| <b>Mortality, procedural (%)</b>   |             |                      |                      |              |                   |                      |                                               |          |     |
| 15 <sup>7</sup>                    | Case series | Serious <sup>3</sup> | None                 | None         | None <sup>5</sup> | None                 | <b>0/501 (0%)</b><br><b>(95% CI 0- 0.01%)</b> | VERY LOW | TBD |
| <b>Major bleeding (%)</b>          |             |                      |                      |              |                   |                      |                                               |          |     |
| 15 <sup>7</sup>                    | Case series | Serious <sup>3</sup> | None                 | None         | None <sup>5</sup> | None                 | <b>0/501 (0%)</b><br><b>(95% CI 0- 0.01%)</b> | VERY LOW | TBD |
| <b>Pneumothorax (%)</b>            |             |                      |                      |              |                   |                      |                                               |          |     |
| 10 <sup>8</sup>                    | Case series | Serious <sup>3</sup> | None                 | None         | None <sup>5</sup> | None                 | <b>0/232 (0%)</b><br><b>(95% CI 0- 0.02%)</b> | VERY LOW | TBD |

**Footnotes:**

<sup>1</sup> Bonjaoude, et al. was excluded from the analysis and evidence profile as an outlier, likely due to enrollment of a slightly different population.

<sup>2</sup> Included all studies in the bibliography except Bonjaoude (2012).

<sup>3</sup> Most studies were retrospective analyses, rather than prospective studies that enrolled consecutive patients with legitimate uncertainty.

<sup>4</sup> Could not do a meta-analysis using Generic Inverse Variance and, therefore, could not calculate the I<sup>2</sup>. However, the wide range suggests inconsistency across studies.

<sup>5</sup> The ends of the confidence interval would likely lead to the same clinical decision.

<sup>6</sup> Included all studies in the bibliography except Bonjaoude (2012), Hong (2013), Oki (2012, 2013, and 2018).

<sup>7</sup> Included all studies in the bibliography except Bonjaoude (2012) and Pakhale (2006).

<sup>8</sup> Included all studies in the bibliography except Bonjaoude (2012), Hong (2013), Koerner (1975), Koonitz (1976), Oki (2012), and Pakhale (2006).

**QUESTION #2: Should patients with suspected sarcoidosis and mediastinal and/or hilar lymphadenopathy for whom it has been determined that tissue sampling is necessary undergo EBUS-guided lymph node sampling or mediastinoscopy as the initial mediastinal and/or hilar lymph node sampling procedure?**

**Search strategy**

| #  | Searches                                               |
|----|--------------------------------------------------------|
| 1  | Endoscopic Ultrasound-Guided Fine Needle Aspiration/   |
| 2  | EBUS\$.mp.                                             |
| 3  | (endoscop\$ adj3 (ultrasound or ultrasonograph\$)).mp. |
| 4  | endosonograph\$.mp.                                    |
| 5  | "Ultrasonography, Interventional"/                     |
| 6  | or/1-5 [all EBUS]                                      |
| 7  | Mediastinoscopy/                                       |
| 8  | Mediastinoscopes/                                      |
| 9  | mediastinoscop\$.mp.                                   |
| 10 | (endoscop\$ adj3 (mediastin\$ or lymph\$)).mp.         |

|    |                                                      |
|----|------------------------------------------------------|
| 11 | or/7-10 [mediastinoscopy]                            |
| 12 | 6 or 11                                              |
| 13 | exp sarcoidosis/                                     |
| 14 | sarcoidosis/                                         |
| 15 | sarcoid\$.mp.                                        |
| 16 | (besnier adj boeck\$).tw.                            |
| 17 | (boeck\$ adj (disease or sarcoid)).tw.               |
| 18 | (schaumann\$ adj (disease or syndrome)).tw.          |
| 19 | uveoparoti\$.tw.                                     |
| 20 | (benign\$ adj lymphogranuloma\$).tw.                 |
| 21 | ((junging or heerfordt or lofgren) adj syndrome).tw. |
| 22 | neurosarcoidosis.tw.                                 |
| 23 | (lupus adj pernio).tw.                               |
| 24 | (idiopathic adj3 inflammat\$ adj3 granulomat\$).tw.  |
| 25 | or/13-24 [sarcoidosis]                               |
| 26 | 12 and 25 [EBUS or mediastinoscopy and sarcoidosis]  |

### Flow of information

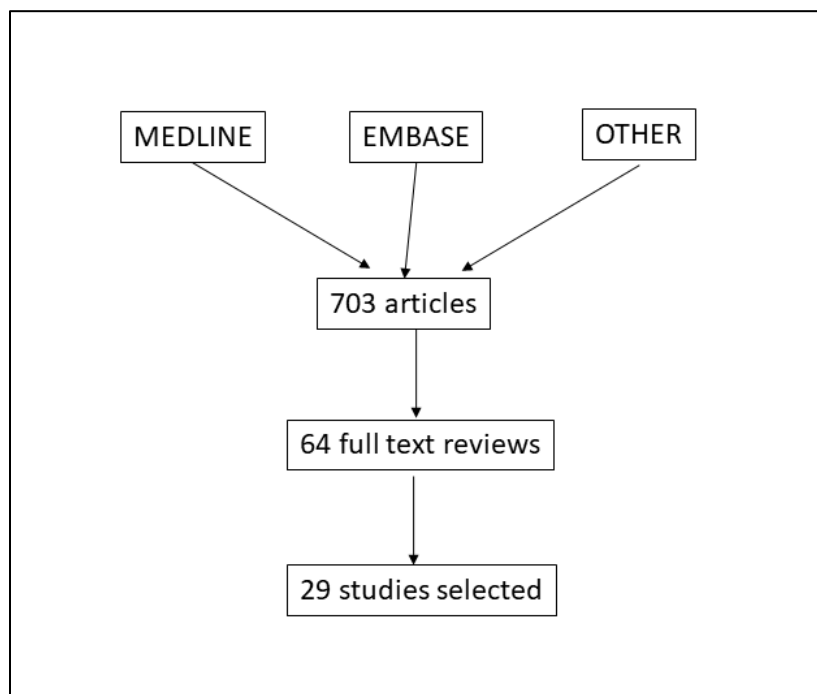

### Definitions

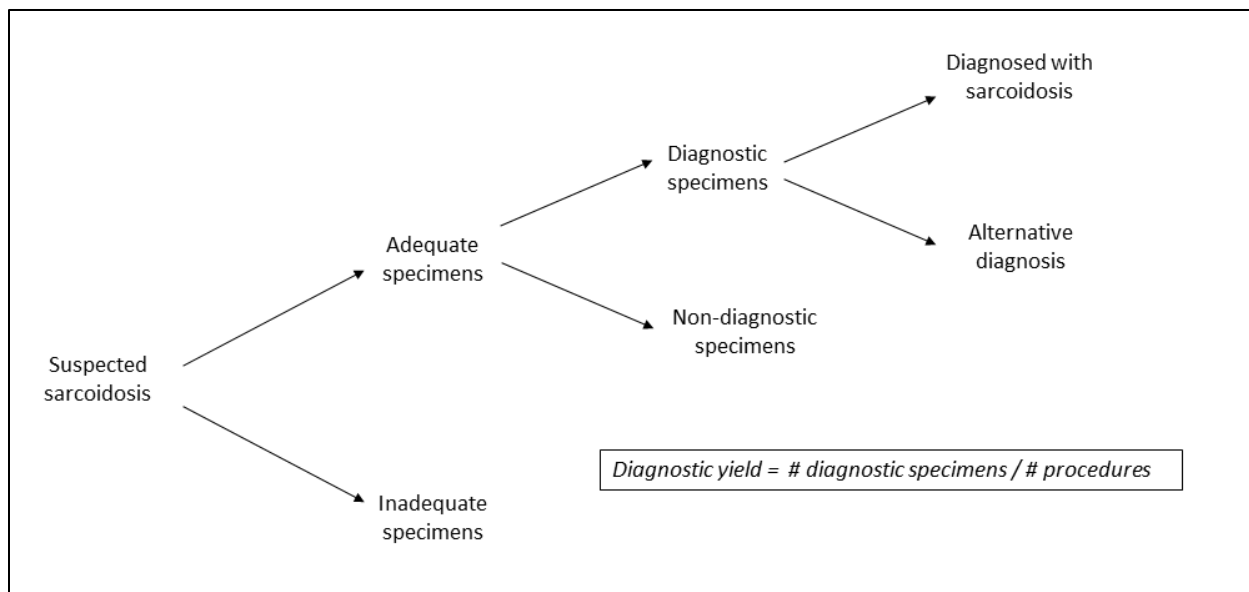

1. % Adequate samples = adequate samples / procedures
2. % Inadequate samples = inadequate samples / procedures
3. % Diagnostic samples = specific diagnoses / adequate specimens
4. % Non-diagnostic samples = non-diagnostic samples / adequate specimens
5. % Sarcoidosis diagnoses = sarcoidosis diagnoses / specific diagnoses
6. % Other diagnoses = other diagnoses / specific diagnoses
7. Diagnostic yield = specific diagnoses / procedures
8. Note that when all procedures yield adequate specimens, then % diagnostic samples = diagnostic yield

## Selected studies with outcomes

| <i>EBUS-guided lymph node sampling</i> |                  |                    |                                           |                                               |                                      |                                          |                                                |                                                   |
|----------------------------------------|------------------|--------------------|-------------------------------------------|-----------------------------------------------|--------------------------------------|------------------------------------------|------------------------------------------------|---------------------------------------------------|
| Study                                  | Adequate samples | Inadequate samples | Diagnostic samples among adequate samples | Non-diagnostic samples among adequate samples | Sarcoidosis among diagnostic samples | Other diagnoses among diagnostic samples | Diagnoses other than sarcoidosis               | Diagnostic yield (diagnoses among all procedures) |
| <b>Adolfo Aragaki-Nakahodo 2017</b>    | NR               | NR                 | NR                                        | NR                                            | 12/14 (86%)                          | 2/14 (14%)                               | 1 tuberculosis, 1 mantle-cell lymphoma         | 14/36 (39%)                                       |
| <b>Balwan 2018</b>                     | 15/15 (100%)     | 0/15 (0%)          | 14/15 (93%)                               | 1/15 (7%)                                     | 14/14 (100%)                         | 0/14 (0%)                                | None                                           | 14/15 (93%)                                       |
| <b>Boujaoude 2012</b>                  | NR               | NR                 | NR                                        | NR                                            | 53/64 (83%)                          | 11/64 (17%)                              | 4 NHL, 2 HL, 2 silicosis, 2 fibrosis, 1 cancer | 64/78 (82%)                                       |
| <b>Garwood 2007</b>                    | NR               | NR                 | NR                                        | NR                                            | 41/41 (100%)                         | 0/41 (0%)                                | N/A                                            | 41/49 (84%)                                       |
| <b>Hong 2013</b>                       | NR               | NR                 | NR172 our                                 | NR                                            | 29/30 (97%)                          | 1/30 (3%)                                | 1 cancer                                       | 30/33 (91%)                                       |
| <b>Li 2014</b>                         | NR               | NR                 | NR                                        | NR                                            | 29/30 (97%)                          | 1/30 (3%)                                | 1 tuberculosis                                 | 30/31 (97%)                                       |
| <b>Low 2014</b>                        | 13/15 (87%)      | 2/15 (13%)         | 9/13 (69%)                                | 4/13(31%)                                     | 9/9 (100%)                           | 0/10 (0%)                                | N/A                                            | 9/15 (60%)                                        |



|                            |                                                                |                                                           |                                                                |                                                               |                                                                  |                                                             |                                                           |                                                                  |
|----------------------------|----------------------------------------------------------------|-----------------------------------------------------------|----------------------------------------------------------------|---------------------------------------------------------------|------------------------------------------------------------------|-------------------------------------------------------------|-----------------------------------------------------------|------------------------------------------------------------------|
| <b>Navasakulpong 2016</b>  | 44/45 (98%)                                                    | 1/45(2%)                                                  | 36/44 (82%)                                                    | 8/44 (18%)                                                    | 36/36 (100%)                                                     | 0/36 (0%)                                                   | N/A                                                       | 36/45 (80%)                                                      |
| <b>Oki 2012</b>            | NR                                                             | NR                                                        | NR                                                             | NR                                                            | 51/53 (96%)                                                      | 2/53 (4%)                                                   | 2 tuberculosis                                            | 53/62 (85%)                                                      |
| <b>Raddaoui 2014</b>       | NR                                                             | NR                                                        | NR                                                             | NR                                                            | 16/16 (100%)                                                     | 0/16 (0%)                                                   | N/A                                                       | 16/19 (84%)                                                      |
| <b>Ribeiro 2014</b>        | 38/39 (97%)                                                    | 1/39 (3%)                                                 | 31/38 (82%)                                                    | 7/38 (18%)                                                    | 31/31 (100%)                                                     | 0/31 (0%)                                                   | N/A                                                       | 31/39 (79%)                                                      |
| <b>Tremblay 2009</b>       | NR                                                             | NR                                                        | NR                                                             | NR                                                            | 23/23 (100%)                                                     | 0/23 (0%)                                                   | N/A                                                       | 23/24 (96%)                                                      |
| <b>Wong 2007</b>           | 62/65 (95%)                                                    | 3/65 (5%)                                                 | 56/62 (90%)                                                    | 6/62 (10%)                                                    | 56/56 (100%)                                                     | 0/56 (0%)                                                   | N/A                                                       | 56/65 (86%)                                                      |
| <b>Oki 2007</b>            | NR                                                             | NR                                                        | NR                                                             | NR                                                            | 13/13 (100%)                                                     | 0/13 (0%)                                                   | N/A                                                       | 13/15 (87%)                                                      |
| <b>Yanardag 2006</b>       | NR                                                             | NR                                                        | NR                                                             | NR                                                            | 66/66 (100%)                                                     | 0/66 (0%)                                                   | N/A                                                       | 66/68 (97%)                                                      |
| <b>Dziedzic 2017</b>       | NR                                                             | NR                                                        | NR                                                             | NR                                                            | 549/549 (100%)                                                   | 0/549 (0%)                                                  | N/A                                                       | 549/653 (84%)                                                    |
| <b>Oki 2018</b>            | NR                                                             | NR                                                        | NR                                                             | NR                                                            | 81/90 (90%)                                                      | 9/90 (10)                                                   | 5 lung cancers, 3 other cancers, 1 necrotizing granulomas | 90/109 (83%)                                                     |
| <i>Pooled (weighted)</i>   | <i>Not estimable</i>                                           | <i>Not estimable</i>                                      | <u>86%</u><br><i>(95% CI 81-92%)</i>                           | <u>14%</u><br><i>(95% CI 8-20%)</i>                           | <i>Not estimable</i>                                             | <i>Not estimable</i>                                        |                                                           | <u>87%</u><br><i>(95% CI 84-91%)</i>                             |
| <i>Pooled (unweighted)</i> | <u>172/179</u><br><i>(96.1%)</i><br><u>(95% CI 92.2-98.1%)</u> | <u>7/179</u><br><i>(3.9%)</i><br><u>(95% CI 1.9-7.9%)</u> | <u>146/172</u><br><i>(84.9%)</i><br><u>(95% CI 78.8-89.5%)</u> | <u>26/172</u><br><i>(15.1%)</i><br><u>(95% CI 10.5-21.2%)</u> | <u>1097/1121</u><br><i>(97.9%)</i><br><u>(95% CI 96.8-98.6%)</u> | <u>24/1121</u><br><i>(2.1%)</i><br><u>(95% CI 1.4-3.2%)</u> |                                                           | <u>1121/1320</u><br><i>(84.9%)</i><br><u>(95% CI 82.9-86.8%)</u> |
| <i>Median (range)</i>      | <u>97.4%</u><br><i>(86.7% to 100%)</i>                         | <u>2.6%</u><br><i>(0% to 13.3%)</i>                       | <u>81.8%</u><br><i>(69.2% to 93.3%)</i>                        | <u>13.9%</u><br><i>(6.7% to 30.8%)</i>                        | <u>100%</u><br><i>(82.8% to 100%)</i>                            | <u>0%</u><br><i>(0% to 17.2%)</i>                           |                                                           | <u>84.8%</u><br><i>(60.0% to 97.1%)</i>                          |

| <b>Mediastinoscopy</b> |                                         |                    |                                           |                                               |                                                                       |                                          |                                  |                                                   |
|------------------------|-----------------------------------------|--------------------|-------------------------------------------|-----------------------------------------------|-----------------------------------------------------------------------|------------------------------------------|----------------------------------|---------------------------------------------------|
| Study                  | Adequate samples                        | Inadequate samples | Diagnostic samples among adequate samples | Non-diagnostic samples among adequate samples | Sarcoidosis among diagnostic samples                                  | Other diagnoses among diagnostic samples | Diagnoses other than sarcoidosis | Diagnostic yield (diagnoses among all procedures) |
| <b>Pakhale 2006</b>    | 55/55 (100%)                            | 0/55 (0%)          | 54/55 (98%)                               | 1/55 (2%)                                     | 49/54 (91%)                                                           | 5/54 (9%)                                | Reactive LAN <sub>x5</sub>       | 54/55 (98%)                                       |
| <b>Study</b>           | <b>Sarcoidosis among all procedures</b> |                    |                                           |                                               | <b>Other diagnosis or non-diagnostic samples among all procedures</b> |                                          |                                  |                                                   |
| <b>Pakhale 2006</b>    | 49/55 (89%)                             |                    |                                           |                                               | 6/55 (11%)                                                            |                                          |                                  |                                                   |
| <b>Tucker 1970</b>     | 48/50 (96%)                             |                    |                                           |                                               | 2/50 (4%)                                                             |                                          |                                  |                                                   |
| <b>Carlens 1959</b>    | 118/123 (96%)                           |                    |                                           |                                               | 5/123 (4%)                                                            |                                          |                                  |                                                   |
| <b>Nielsen 1966</b>    | 115/121 (95%)                           |                    |                                           |                                               | 6/121 (5%)                                                            |                                          |                                  |                                                   |
| <b>Maassen 1967</b>    | 115/115 (100%)                          |                    |                                           |                                               | 0/115 (0%)                                                            |                                          |                                  |                                                   |
| <b>Jepsen 1966</b>     | 41/43 (95%)                             |                    |                                           |                                               | 2/43 (5%)                                                             |                                          |                                  |                                                   |
| <b>Lofgren 1964</b>    | 32/35 (91%)                             |                    |                                           |                                               | 3/35 (9%)                                                             |                                          |                                  |                                                   |
| <b>Palva 1964</b>      | 27/28 (96%)                             |                    |                                           |                                               | 1/28 (4%)                                                             |                                          |                                  |                                                   |
| <b>Patilia 1964</b>    | 25/25 (100%)                            |                    |                                           |                                               | 0/25 (0%)                                                             |                                          |                                  |                                                   |
| <b>Mikhail 1971</b>    | 121/130 (93%)                           |                    |                                           |                                               | 9/130 (7%)                                                            |                                          |                                  |                                                   |

|                            |                                                    |                                               |
|----------------------------|----------------------------------------------------|-----------------------------------------------|
| <b>Berge 1964</b>          | 33/33 (100%)                                       | 0/33 (0%)                                     |
| <b>Friedel 1964</b>        | 30/30 (100%)                                       | 0/30 (0%)                                     |
| <i>Pooled (weighted)</i>   | <i>Not estimable</i>                               | <i>Not estimable</i>                          |
| <i>Pooled (unweighted)</i> | <i>754/787 (95.8%)<br/>(95% CI 94.2% to 97.0%)</i> | <i>33/787 (4.2%)<br/>(95% CI 3.0 to 5.8%)</i> |
| <i>Median (range)</i>      | <i>96.0%<br/>(90.7% to 100%)</i>                   | <i>4.0%<br/>(0% to 9.3%)</i>                  |

| <i>Apples to apples, and oranges to oranges</i> |                                          |                               |                         |
|-------------------------------------------------|------------------------------------------|-------------------------------|-------------------------|
| <b>Sarcoidosis among all procedures</b>         |                                          |                               |                         |
|                                                 | <b>Pooled (weighted)</b>                 | <b>Pooled (unweighted)</b>    | <b>Median (range)</b>   |
| <b>EBUS</b>                                     | 85%<br>(95% CI 80% to 89%)               | 83.1%<br>(95% CI 81.0-85.0%)  | 84.1%<br>(60.0 – 97.1%) |
| <b>Mediastinoscopy</b>                          | Not estimable                            | 95.8%<br>(95% CI 94.2 – 97%)  | 96%<br>(90.7 – 100%)    |
| <b>Diagnostic yield</b>                         |                                          |                               |                         |
|                                                 | <b>Pooled (weighted)</b>                 | <b>Pooled (unweighted)</b>    | <b>Median (range)</b>   |
| <b>EBUS</b>                                     | 87%<br>(95% CI 84-91%)                   | 84.9%<br>(95% CI 82.9- 86.8%) | 84.8%<br>(60% to 97.1%) |
| <b>Mediastinoscopy</b>                          | 98%<br>(95% CI 90-99.9%)<br>Single study |                               |                         |

| <i>Mediastinoscopy</i> |                  |                       |                       |                      |              | <i>EBUS-guided sampling</i>         |                  |                       |                      |                   |
|------------------------|------------------|-----------------------|-----------------------|----------------------|--------------|-------------------------------------|------------------|-----------------------|----------------------|-------------------|
| <b>Study</b>           | <b>Mortality</b> | <b>Major bleeding</b> | <b>Minor bleeding</b> | <b>Pneumo-thorax</b> | <b>Other</b> | <b>Study</b>                        | <b>Mortality</b> | <b>Major bleeding</b> | <b>Pneumo-thorax</b> | <b>Other</b>      |
| <b>Pakhale 2006</b>    | NR               | NR                    | NR                    | NR                   | NR           | <b>Adolfo Aragaki-Nakahodo 2017</b> | 0/36 (0%)        | 0/36 (0%)             | NR                   | 0/36 (0%)         |
| <b>Tucker 1970</b>     | NR               | NR                    | NR                    | NR                   | NR           | <b>Balwan 2018</b>                  | 0/15 (0%)        | 0/15 (0%)             | 0/15 (0%)            | 0/15 (0%)         |
| <b>Carlens 1959</b>    | NR               | NR                    | NR                    | NR                   | NR           | <b>Boujaoude 2012</b>               | 0/78 (0%)        | 0/78 (0%)             | 0/78 (0%)            | 0/78 (0%)         |
| <b>Nielsen 1966</b>    | NR               | NR                    | NR                    | NR                   | NR           | <b>Garwood 2007</b>                 | 0/50 (0%)        | 0/50 (0%)             | 0/50 (0%)            | 1/50 (2%) stridor |
| <b>Maassen 1967</b>    | NR               | NR                    | NR                    | NR                   | NR           | <b>Hong 2013</b>                    | 0/33 (0%)        | 0/33 (0%)             | NR                   | 0/33 (0%)         |
| <b>Jepsen 1966</b>     | NR               | NR                    | NR                    | NR                   | NR           | <b>Li 2014</b>                      | 0/31 (0%)        | 0/31 (0%)             | 0/31 (0%)            | 0/31 (0%)         |
| <b>Lofgren 1964</b>    | NR               | NR                    | NR                    | NR                   | NR           | <b>Low 2014</b>                     | 0/15 (0%)        | 0/15 (0%)             | 0/15 (0%)            | 0/15 (0%)         |
| <b>Palva 1964</b>      | NR               | NR                    | NR                    | NR                   | NR           | <b>Navasakulpong 2016</b>           | NR               | NR                    | NR                   | NR                |

|                            |                      |                      |                      |                      |                      |                            |                                 |                                 |                                |                                    |
|----------------------------|----------------------|----------------------|----------------------|----------------------|----------------------|----------------------------|---------------------------------|---------------------------------|--------------------------------|------------------------------------|
| <b>Patilia 1964</b>        | NR                   | NR                   | NR                   | NR                   | NR                   | <b>Oki 2012</b>            | 0/62 (0%)                       | 0/62 (0%)                       | 0/62 (0%)                      | 0/62 (0%)                          |
| <b>Mikhail 1971</b>        | NR                   | NR                   | NR                   | NR                   | NR                   | <b>Raddaoui 2014</b>       | NR                              | NR                              | NR                             | NR                                 |
| <b>Berge 1964</b>          | NR                   | NR                   | NR                   | NR                   | NR                   | <b>Ribeiro 2014</b>        | 0/39 (0%)                       | 0/39 (0%)                       | 0/39 (0%)                      | 0/39 (0%)                          |
| <b>Friedel 1964</b>        | NR                   | NR                   | NR                   | NR                   | NR                   | <b>Tremblay 2009</b>       | 0/24 (0%)                       | 0/24 (0%)                       | 0/24 (0%)                      | 0/24 (0%)                          |
|                            |                      |                      |                      |                      |                      | <b>Wong 2007</b>           | 0/65 (0%)                       | 0/65 (0%)                       | 0/65 (0%)                      | 0/65 (0%)                          |
|                            |                      |                      |                      |                      |                      | <b>Oki 2007</b>            | 0/15 (0%)                       | 0/15 (0%)                       | 0/15 (0%)                      | 0/15 (0%)                          |
|                            |                      |                      |                      |                      |                      | <b>Yanardag 2006</b>       | 0/68 (0%)                       | 0/68 (0%)                       | 0/68 (0%)                      | 0/68 (0%)                          |
|                            |                      |                      |                      |                      |                      | <b>Dziedzic 2017</b>       | 0/653 (0%)                      | 0/653 (0%)                      | 0/653 (0%)                     | NR                                 |
|                            |                      |                      |                      |                      |                      | <b>Oki 2018</b>            | 0/109 (0%)                      | 0/109 (0%)                      | 0/109 (0%)                     | 0/109 (0%)                         |
| <b>Pooled (weighted)</b>   | <i>Not estimable</i> | <b>Pooled (weighted)</b>   | <i>Not estimable</i>            | <i>Not estimable</i>            | <i>Not estimable</i>           | <i>Not estimable</i>               |
| <b>Pooled (unweighted)</b> | <i>Not estimable</i> | <b>Pooled (unweighted)</b> | 0/1293 (0%)<br>(95% CI 0- 0.3%) | 0/1293 (0%)<br>(95% CI 0- 0.3%) | 0/1224 (0%)<br>(95% CI 0-0.3%) | 1/1293 (0.01%)<br>(95% CI 0- 0.4%) |
| <b>Median (range)</b>      | <i>Not estimable</i> | <b>Median (range)</b>      | 0% (0% to 0%)                   | 0% (0% to 0%)                   | 0% (0% to 0%)                  | 0% (0% to 2%)                      |

## Forest plots

EBUS diagnostic samples among adequate specimens

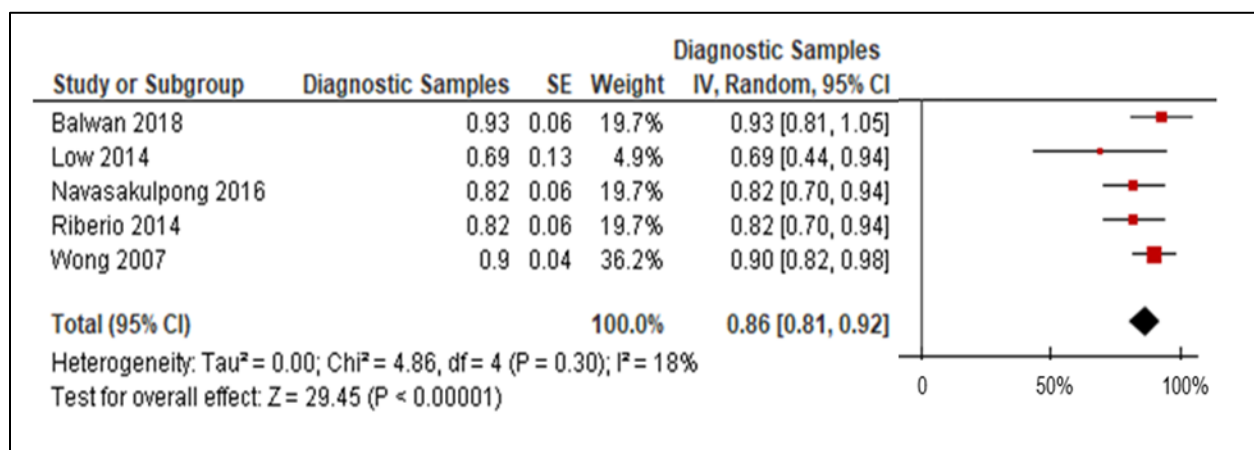

EBUS non-diagnostic samples among adequate specimens

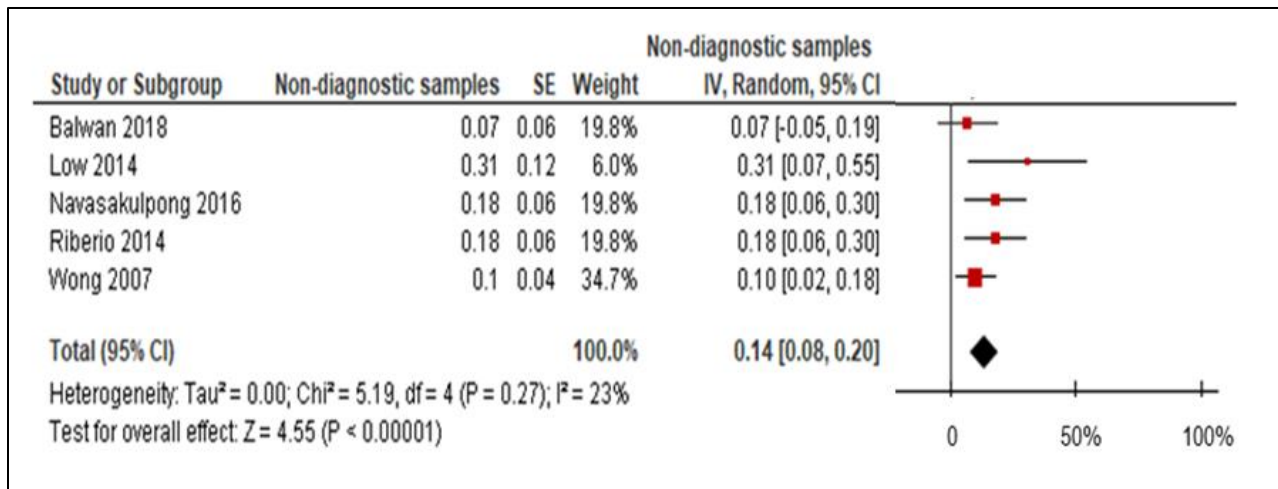

EBUS diagnostic yield

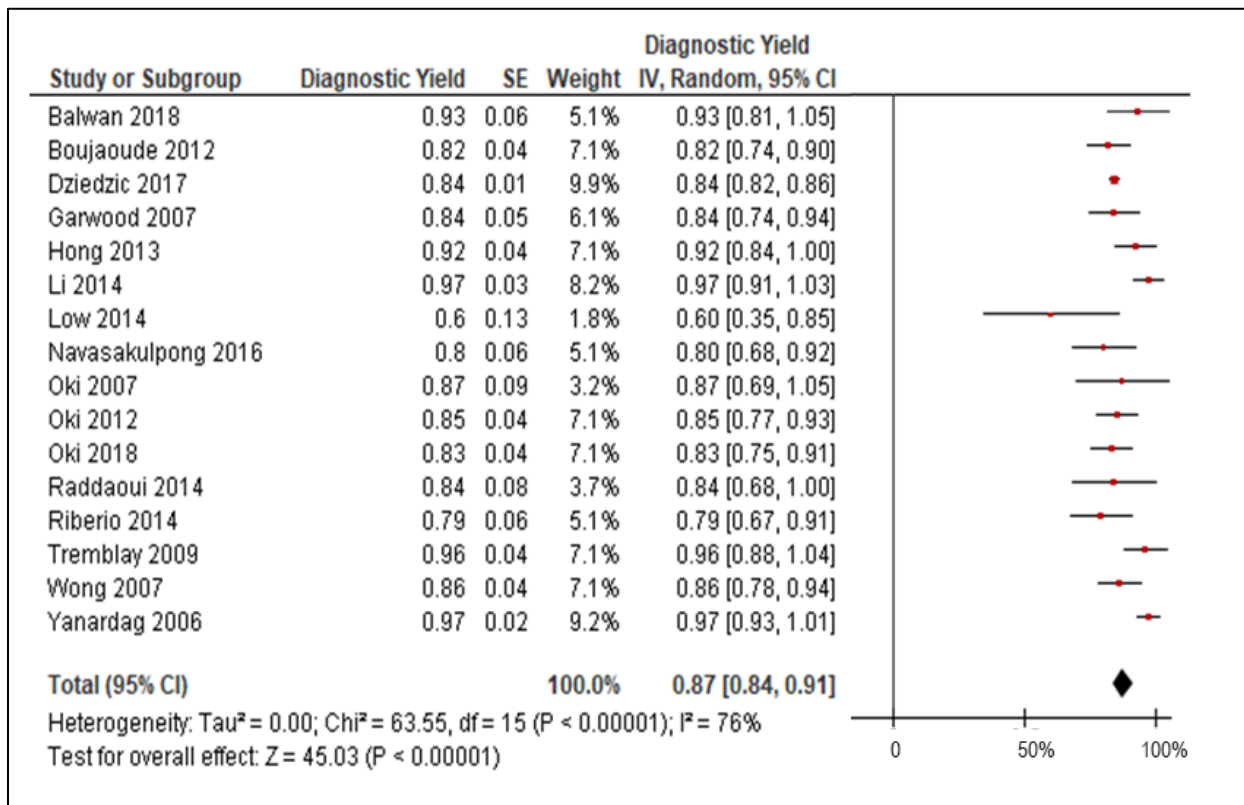

## Markov model

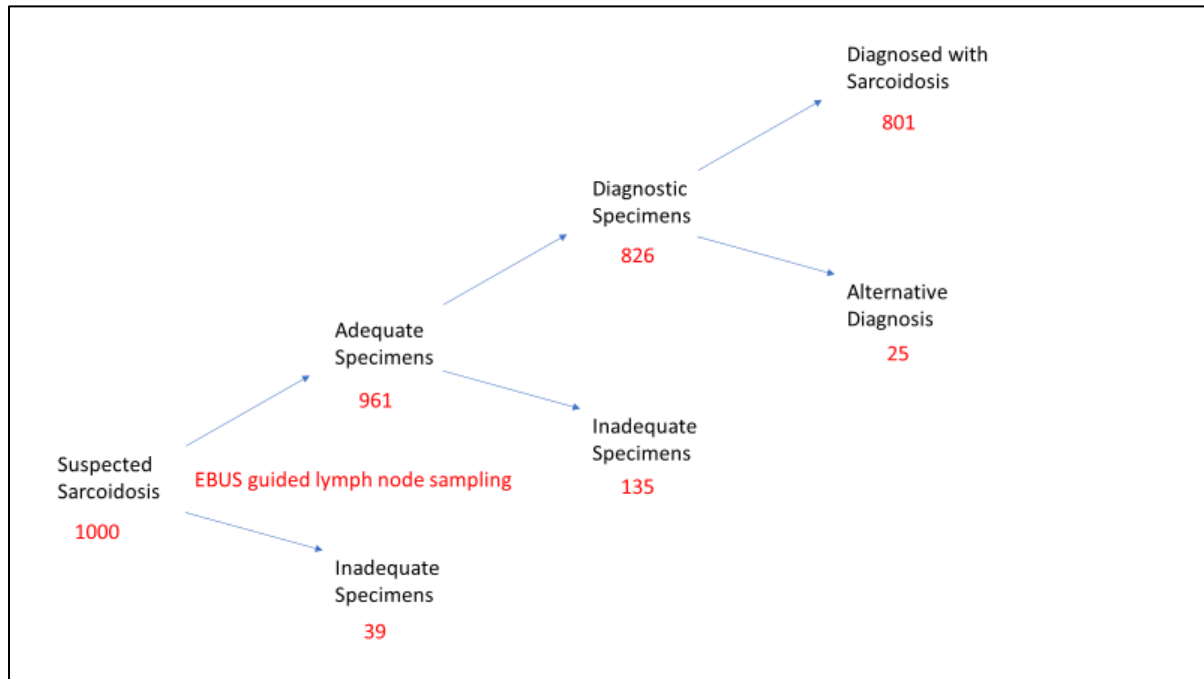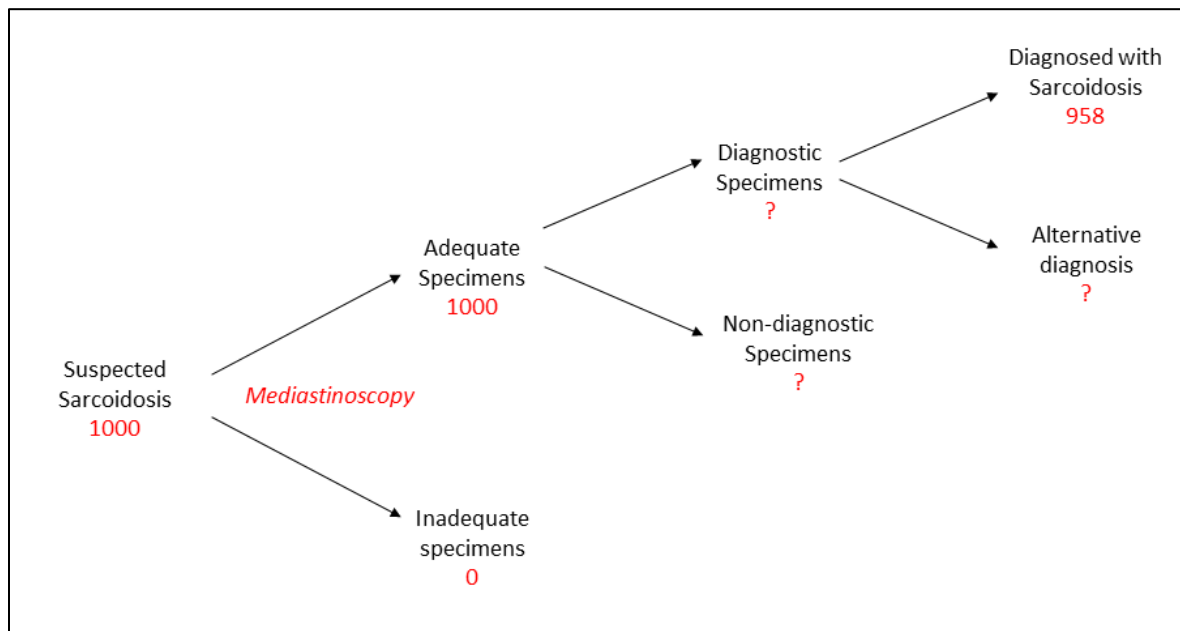

## Evidence profile

**Comparison:** EBUS-guided lymph node sampling versus mediastinoscopy

**Bibliography:**

1. Pakhale SS et al. Has mediastinoscopy still a role in suspected stage I sarcoidosis? Sarcoidosis Vasculitis & Diffuse Lung Diseases. 2006;23(1)66-69.
2. Tucker JA et al. Mediastinoscopy with special reference to the diagnosis of sarcoid. Annals of Otology, Rhinology & Laryngoscopy. 1970;79(5):937-943.
3. Carlens E. Mediastinoscopy; a method of inspection and tissue biopsy in the superior mediastinum. Dis Chest 1959; 36:343-352.
4. Nielsen EG and Olsen H. Mediastinoscopy. Danish Med Bull. 1966; 13:193
5. Maassen W. Ergebnisse und Bedeutung der Mediastinoskopie . 1967.
6. Jepsen O. Mediastinoscopy. Einar Munkegaard Forlag. 1966.
7. Lofgren S and Snellman B. Principles and procedures for obtaining biopsies in sarcoidosis. Acta Med Scand Suppl. 1964-1965; 425-431:225-227.
8. Palva T. Mediastinal Sarcoidosis. Acta oto-laryngologica, Supplement. 1964;188:258.
9. Patilia Jr. Observations on the significance of mediastinoscopy in the diagnosis of sarcoidosis. Acta Med Scand Suppl. 1964-1965;425-431:239-240
10. Mikhaïl JR et al. Mediastinoscopy: a diagnostic procedure in hilar and paratracheal adenopathy. Postgraduate Medical Journal. 1971;47:698-704.
11. Bergh et al. Mediastinal exploration by the technique of Carlens. Diseases of the Chest. 1964;64:399.
12. Friedel H et al. The significance of bronchoscopy and mediastinoscopy for the diagnosis of sarcoidosis. Zeitschrift fur Tuberkulose und Erkrankungen der Thoraxorgane. 1964;121:152.
13. Adolfo Aragaki-Nakahodo, et al. The complimentary role of transbronchial lung cryobiopsy and endobronchial ultrasound fine needle aspiration in the diagnosis of sarcoidosis. Respiratory Medicine 2017;131:65-69.
14. Balwan A. Endobronchial ultrasound-guided transbronchial needle aspiration using 19-G needle for sarcoidosis. J Bronchol Intervent Pulmonol 2018; epub ahead of print.
15. Boujaoude Z, et al. Endobronchial ultrasound with transbronchial needle aspiration in the diagnosis of bilateral hilar and mediastinal lymphadenopathy. J Bronchology and Interv Pulmonology 2012; 19(1):19-23.
16. Garwood S, et al. Endobronchial ultrasound for the diagnosis of pulmonary sarcoidosis. CHEST 2007; 132(4):1298-1304.
17. Hong G. et al. Usefulness of Endobronchial Ultrasound guided transbronchial needle aspiration for diagnosis of sarcoidosis. Yonsei Med J 2013;5(4)6:1416-1421.
18. Li K et al. A randomized controlled study of conventional TBNA versus EBUS-TBNA for diagnosis of suspected stage I and II sarcoidosis. Sarcoidosis, vasculitis, and diffuse lung diseases : official journal of WASOG. 2014;31(3):211-218.
19. Low et al. Use of endobronchial ultrasound guided transbronchial needle aspiration in the diagnosis of granulomatous mediastinal lymphadenopathy. Ann Acad Med Singapore 2014;43:250-4.
20. Navasakulpong A et al. Yield of EBUS-TBNA for the diagnosis of sarcoidosis: impact of operator and cytopathologist experience. BMJ open respiratory research. 2016;3(1).
21. Oki M et al. Prospective study of endobronchial ultrasound-guided transbronchial needle aspiration of lymph nodes versus transbronchial lung biopsy of lung tissue for diagnosis of sarcoidosis. Journal of Thoracic & Cardiovascular Surgery. 2012;143(6):1324-1329.
22. Raddaoui et al. Utility of endoscopic ultrasound guided transbronchial fine-needle cytology in the dianosis of sarcoidosis: A Saudi experience. Cytojournal. 2014;11
23. Ribeiro C et al. Diagnosis of sarcoidosis in the endobronchial ultrasound-guided transbronchial needle aspiration era. Revista Portuguesa de Pneumologia. 2014;20(5):237-241.
24. Tremblay A et al. A randomized controlled trial of standard vs endobronchial ultrasonography-guided transbronchial needle aspiration in patients with suspected sarcoidosis. Chest. 2009;136(2):340-346.
25. Wong M et al. Endobronchial ultrasound: new insight for the diagnosis of sarcoidosis. European Respiratory Journal. 2007;29(6):1182-1886.
26. Oki M. et al. Real-time endobronchial ultrasound guided transbronchial needle aspiration is useful for diagnosing sarcoidosis. Respirology. 2007;12(6):863-868.
27. Yanardag H et al. Clinical valuve of mediastinoscopy in the diagnosis of sarcoidosis: an analysis of 68 cases. Thoracic & Cardiovascular Surgeon. 2006;54(3):198-201.
28. Dziedzic DA et al. The role of EBUS-TBNA and standard bronchoscopic modalities in the diagnosis of sarcoidosis. The clinical respiratory journal. 2017;11(1):58-63.
29. Oki M et al. How many needle passes are needed for endobronchial ultrasound guided transbronchial needle aspiration for sarcoidosis? A prospective multicenter study. Respiration. 2018;95(4):251-257.

| Quality assessment               |             |                      |                      |              |             |                      | Effect                                                  | Quality  | Importance |
|----------------------------------|-------------|----------------------|----------------------|--------------|-------------|----------------------|---------------------------------------------------------|----------|------------|
| No of studies                    | Design      | Risk of bias         | Inconsistency        | Indirectness | Imprecision | Other considerations |                                                         |          |            |
| <b>Diagnostic yield (%)</b>      |             |                      |                      |              |             |                      |                                                         |          |            |
| 18 <sup>1</sup>                  | Case series | Serious <sup>2</sup> | Serious <sup>3</sup> | None         | None        | None                 | EBUS: 87% (95% CI 84-91%)<br>MED: 98% (95% CI 90-99.9%) | VERY LOW | TBD        |
| <b>Mortality, procedural (%)</b> |             |                      |                      |              |             |                      |                                                         |          |            |
| 15 <sup>4</sup>                  | Case series | Serious <sup>2</sup> | None                 | None         | None        | None                 | EBUS: 0% (95% CI 0 – 0.3%)<br>MED: Not reported         | VERY LOW | TBD        |

| Major bleeding (%) |             |                      |      |      |      |      |                                                 |          |     |
|--------------------|-------------|----------------------|------|------|------|------|-------------------------------------------------|----------|-----|
| 15 <sup>4</sup>    | Case series | Serious <sup>2</sup> | None | None | None | None | EBUS: 0% (95% CI 0 – 0.3%)<br>MED: Not reported | VERY LOW | TBD |
| Pneumothorax (%)   |             |                      |      |      |      |      |                                                 |          |     |
| 13 <sup>5</sup>    | Case series | Serious <sup>2</sup> | None | None | None | None | EBUS: 0% (95% CI 0 – 0.3%)<br>MED: Not reported | VERY LOW | TBD |

**Footnotes:**

<sup>1</sup> Of the 18 studies that measured diagnostic yield, 17 were for EBUS and only 1 was for mediastinoscopy.

<sup>2</sup> The retrospective design creates a risk of selection bias.

<sup>3</sup> There was serious heterogeneity of the EBUS estimates per the I<sup>2</sup> statistic.

<sup>4</sup> Of the 15 studies that measured procedural mortality, all were for EBUS.

<sup>5</sup> Of the 13 studies that measured procedural mortality, all were for EBUS.

**QUESTION 3: Should patients with sarcoidosis who do not have ocular symptoms undergo screening for ocular sarcoidosis with routine ophthalmological exams?**

**Search strategy**

| #  | Searches                                                                                           |
|----|----------------------------------------------------------------------------------------------------|
| 1  | exp sarcoidosis/                                                                                   |
| 2  | sarcoidosis/                                                                                       |
| 3  | sarcoidosis/ or sarcoidosis, pulmonary/ or uveoparotid fever/                                      |
| 4  | sarcoid\$.mp.                                                                                      |
| 5  | (besnier adj boeck\$).tw.                                                                          |
| 6  | (boeck\$ adj (disease or sarcoid)).tw.                                                             |
| 7  | (schaumann\$ adj (disease or syndrome)).tw.                                                        |
| 8  | uveoparoti\$.tw.                                                                                   |
| 9  | (benign\$ adj lymphogranuloma\$).tw.                                                               |
| 10 | ((junging or heerfordt or lofgren) adj syndrome).tw.                                               |
| 11 | neurosarcoidosis.tw.                                                                               |
| 12 | (lupus adj pernio).tw.                                                                             |
| 13 | (idiopathic adj3 inflammat\$ adj3 granulomat\$).tw.                                                |
| 14 | or/1-13 [all sarcoidosis]                                                                          |
| 15 | exp Diagnostic Techniques, Ophthalmological/ [medline]                                             |
| 16 | exp ophthalmological diagnostic device/ [embase]                                                   |
| 17 | eye examination/ [embase]                                                                          |
| 18 | ((eye\$ or vision or retina\$ or ocular or ophthalm\$) adj3 (technique\$ or exam\$ or test\$)).mp. |
| 19 | 15 or 16 or 17 or 18                                                                               |
| 20 | 14 and 19                                                                                          |

## Selected studies with outcomes

| Study                      | Frequency abnormal eye exams c/w ocular sarcoidosis | Symptomatic patients among those with abnormal eye exams | Frequency of anterior uveitis as the abnormality |
|----------------------------|-----------------------------------------------------|----------------------------------------------------------|--------------------------------------------------|
| Ungprasert 2017            | 23/151 (15%)                                        | 21/23 (91%)                                              | 7/23 (30%)                                       |
| Birnbaum 2015              | 1256/3364 (37%)                                     | NR                                                       | 1013/1256 (81%)                                  |
| Sungur 2013                | 26/48 (53%)                                         | NR                                                       | 4/26 (15%)                                       |
| Judson 2012                | 363/1582 (23%)                                      | NR                                                       | NR                                               |
| Baughman 2012              | 465/1587 (29%)                                      | NR                                                       | NR                                               |
| Sheu 2010                  | 19/55 (35%)                                         | 13/19 (68%)                                              | NR                                               |
| Atmaca 2009                | 18/139 (13%)                                        | NR                                                       | 12/18 (67%)                                      |
| Lee 2009                   | 22/104 (21%)                                        | 14/22 (64%)                                              | 10/22 (45%)                                      |
| Morimoto 2008              | 309/1001 (31%)                                      | NR                                                       | 404/994 (41%)                                    |
| Khanna 2007                | 14/48 (29%)                                         | 12/14 (86%)                                              | 5/15 (33%)                                       |
| Evans 2007                 | 65/81 (80%)                                         | NR                                                       | NR                                               |
| Baughman 2001              | 87/736 (12%)                                        | NR                                                       | NR                                               |
| Drobecka 1999              | 6/33 (18%)                                          | NR                                                       | NR                                               |
| Jabs 1986                  | 47/183 (26%)                                        | NR                                                       | 33/47 (70%)                                      |
| Obenauf 1978               | 202/532 (38%)                                       | NR                                                       | 106/202 (52%)                                    |
| Siltzbach 1974             | 354/1609 (22%)                                      | NR                                                       | NR                                               |
| Jackson 1970               | 12/82 (15%)                                         | NR                                                       | NR                                               |
| James 1964                 | 123/442 (28%)                                       | NR                                                       | 89/123 (72%)                                     |
| <i>Pooled (weighted)</i>   | <i>26%<br/>(95% CI 23-29%)</i>                      | <i>78%<br/>(95% CI 64- 91%)</i>                          | <i>53%<br/>(95% CI 41-64%)</i>                   |
| <i>Pooled (unweighted)</i> | <i>29%<br/>(95% CI 28-30%)</i>                      | <i>77%<br/>(95% CI 66-85%)</i>                           | <i>62%<br/>(95% CI 60-64%)</i>                   |
| <i>Median (range)</i>      | <i>27%<br/>(12% to 80%)</i>                         | <i>77%<br/>(64% to 91%)</i>                              | <i>49%<br/>(15% to 81%)</i>                      |

NR= not reported.

| Study           | No therapy | Topical steroid therapy | Systemic steroid therapy <sup>1</sup> | Both therapies | Visual acuity                                                                                |
|-----------------|------------|-------------------------|---------------------------------------|----------------|----------------------------------------------------------------------------------------------|
| Ungprasert 2017 | 2/23 (9%)  | 5/23 (22%)              | 6/23 (26%)                            | 10/23 (43%)    | With Rx:<br>Improved= 3/20 (15%)<br><sup>2</sup> Stabilized= 8/20 (40%)<br>Worse= 9/20 (45%) |
|                 |            |                         |                                       |                | Without Rx:<br>Improved= 1/1 (100%)                                                          |



|                                      |                                            |                                            |           |             |                                                                                                     |
|--------------------------------------|--------------------------------------------|--------------------------------------------|-----------|-------------|-----------------------------------------------------------------------------------------------------|
|                                      |                                            |                                            |           |             | Stabilized= none<br>Worse= none                                                                     |
| <b>Judson<sup>3</sup><br/>2012</b>   | 188/287 (66%)                              | 99/287 (34%)                               |           |             | NR                                                                                                  |
| <b>Baughman<sup>3</sup><br/>2012</b> | 108/465 (23%)                              | 357/465 (77%)                              |           |             | NR                                                                                                  |
| <b>Lee<br/>2009</b>                  | 3/22 (14%)                                 | 4/22 (18%)                                 | 2/22 (9%) | 13/22 (59%) | With Rx:<br>Improved= 9/18 (50%)<br>Stabilized= 4/18 (22%)<br>Mixed= 4/18 (22%)<br>Worse= 1/18 (6%) |
|                                      |                                            |                                            |           |             | Without Rx:<br>Improved= 1/2 (50%)<br>Stabilized= 1/2 (50%)                                         |
| <b>Pooled<br/>(weighted)</b>         | <b>17%<sup>4</sup><br/>(95% CI 7-26%)</b>  | <b>83%<sup>4</sup><br/>(95% CI 74-93%)</b> |           |             | <b>Improvement or stabilization w/ treatment<br/>64%<br/>(95% CI 47-81%)</b>                        |
| <b>Pooled<br/>(unweighted)</b>       | <b>22%<sup>4</sup><br/>(95% CI 19-26%)</b> | <b>78%<sup>4</sup><br/>(95% CI 74-81%)</b> |           |             | <b>Improvement or stabilization w/ treatment<br/>63%<br/>(95% CI 47-77%)</b>                        |
| <b>Median<br/>(range)</b>            | <b>14%<sup>4</sup><br/>(9-23%)</b>         | <b>86%<sup>4</sup><br/>(77-91%)</b>        |           |             | <b>Improvement or stabilization w/ treatment<br/>63%<br/>(55-72%)</b>                               |

NR= not reported.

<sup>1</sup> Systemic therapy was often initiated to treat concomitant non-ocular disease.

<sup>2</sup> Reported treatment and no treatment; didn't specify the type of treatment.

<sup>3</sup> 7/8 (88%) of those stable with treatment had normal eyesight at baseline, suggesting early detection = preservation of eyesight.

<sup>4</sup> Removed Judson, et al. as an outlier. As a result, I<sup>2</sup> for heterogeneity went from 98% to 67%. The reason for the outlying results are unknown.

## Forest plots

### Frequency of abnormal eye exams

*Initial*

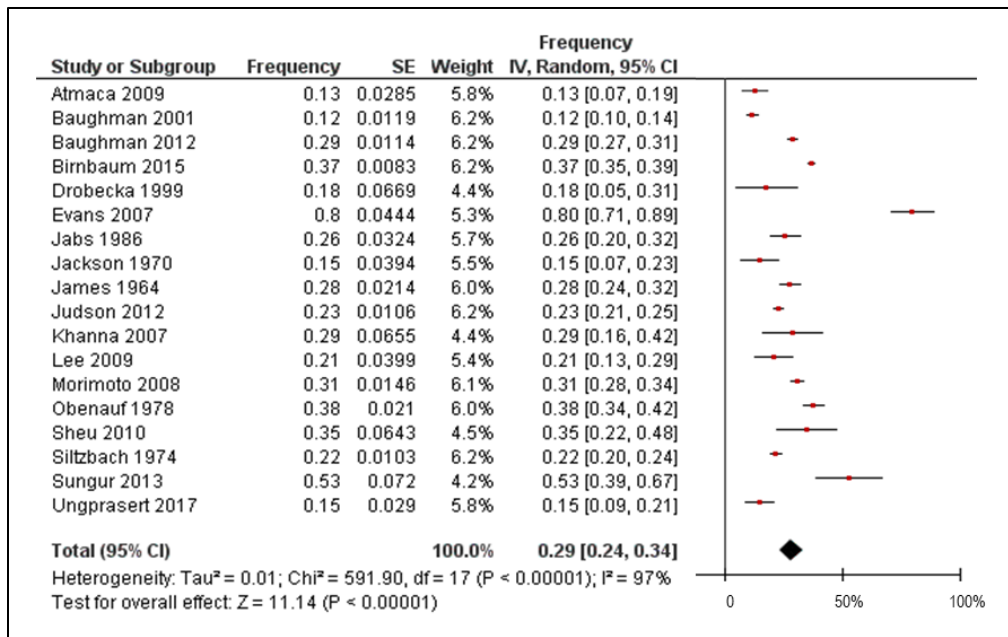

After removal of outliers

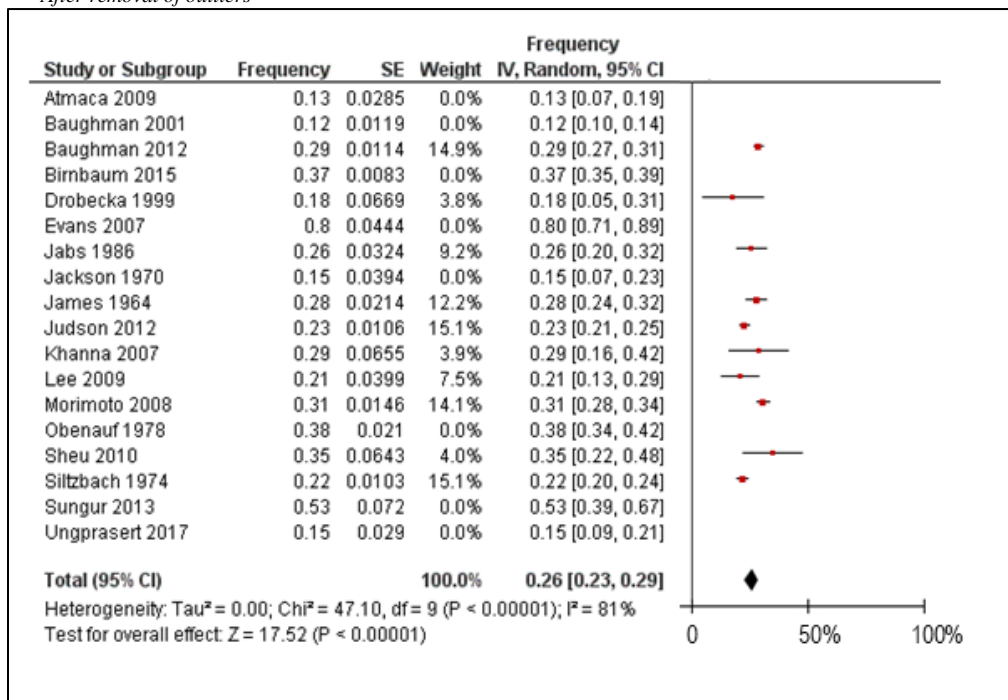

Frequency of symptoms among those with abnormal eye exams

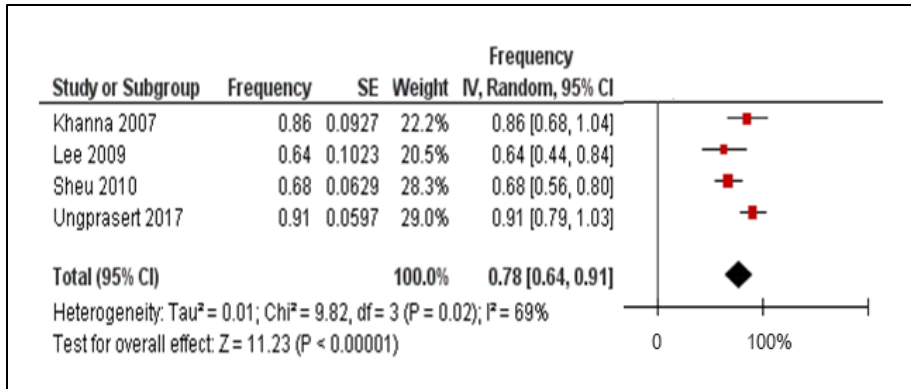

## Frequency of anterior uveitis among abnormal eye exams

*Initial*

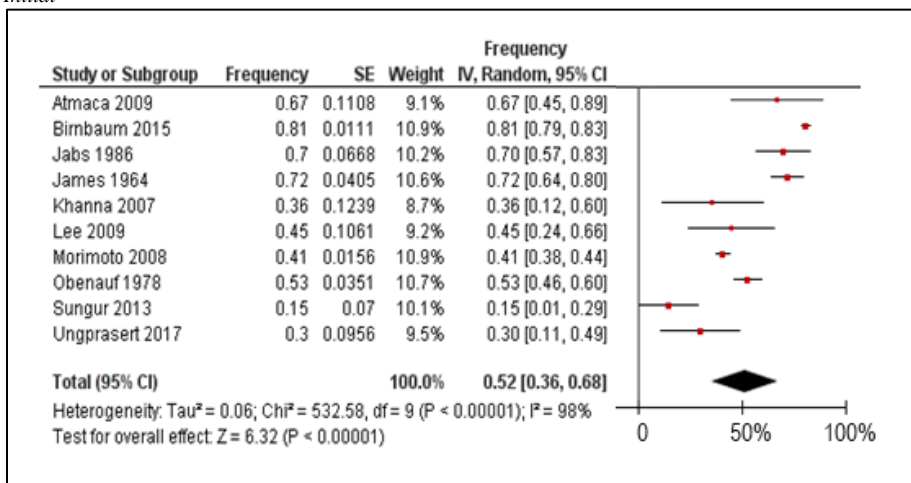

*After removal of outliers*

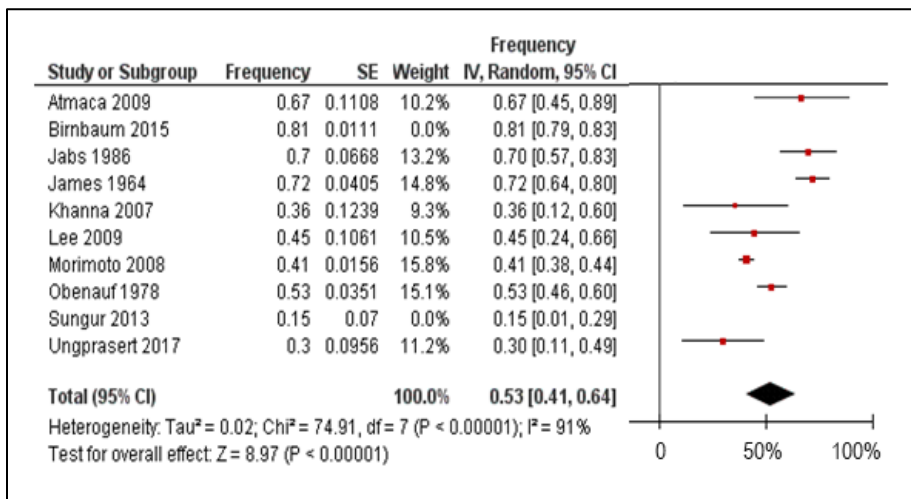

## Frequency of treatment

*Initial*

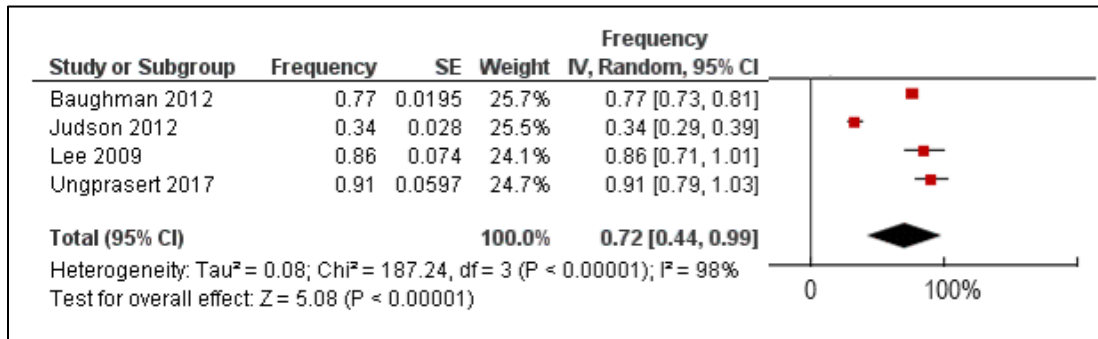

After removal of outliers

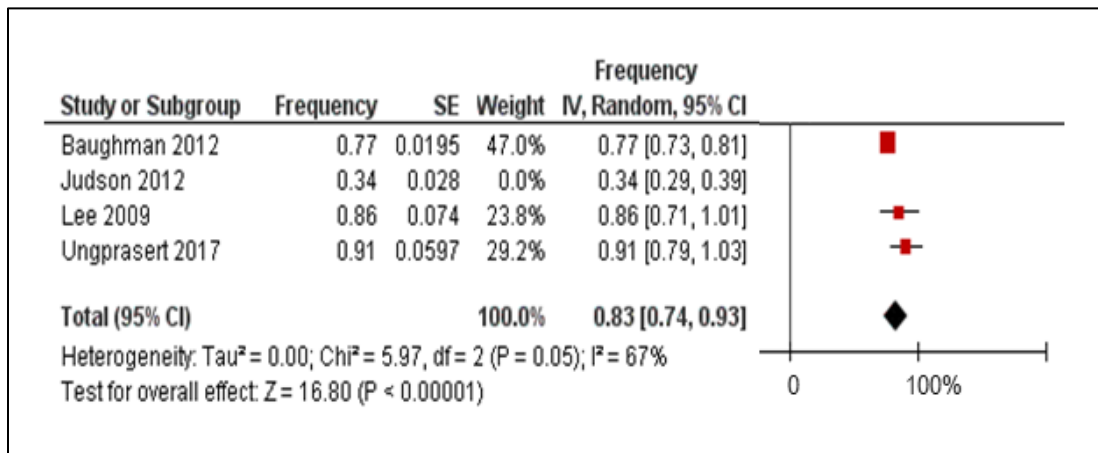

Frequency of improvement or stabilization of vision

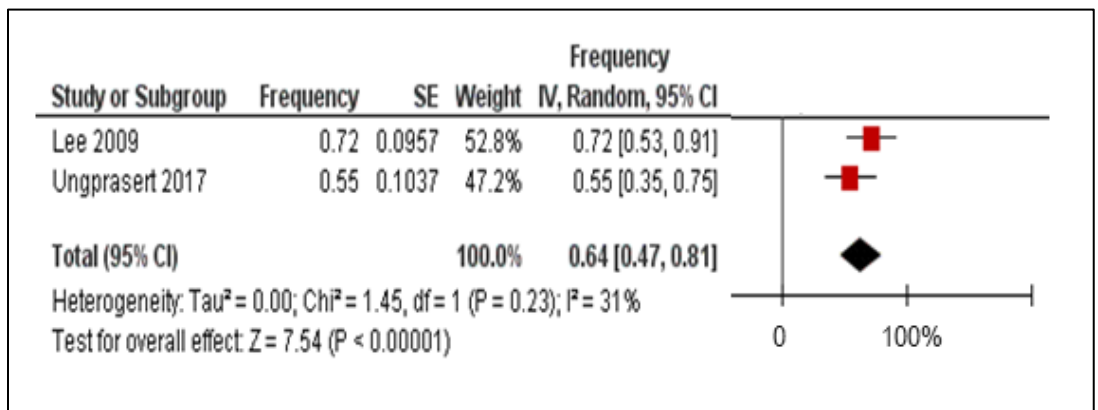

Markov model

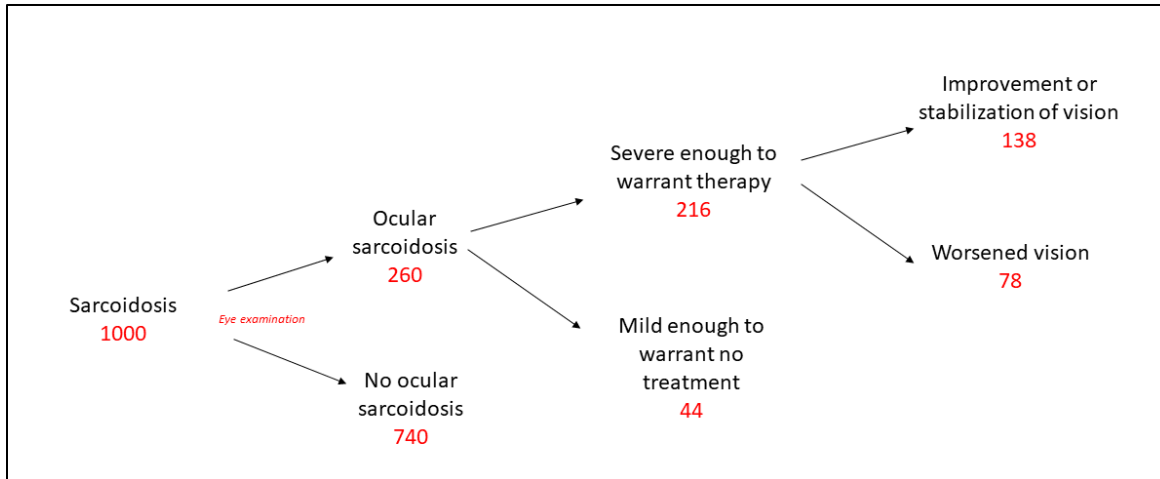

For every 1000 sarcoidosis patients who undergo routine eye exam, abnormalities consistent with ocular sarcoidosis will be found in roughly 260 patients, approximately 216 of whom will have ocular involvement severe enough to warrant treatment with topical or systemic corticosteroids and 138 will have their vision improved or remain stable.

## Evidence profile

**Comparison:** Eye examination versus none

### Bibliography:

- 1) Birnbaum AD, et al. Sarcoidosis in the National Veteran Population: Association of Ocular Inflammation and Mortality. *Ophthalmology* 2015; 122(5):934-938.
- 2) Ungprasert P, et al. Clinical Characteristics of Ocular Sarcoidosis: A Population-based study 1976-2013. *Ocul Immunol Inflamm* 2017; Oct 12:1-7.
- 3) Lee SY, et al. Ocular Sarcoidosis in a Korean Population. *J Korean Med Sci* 2009; 24:413-419.
- 4) Evans M. Differences in Clinical Findings between Caucasians and African-Americans with Biopsy-Proven Sarcoidosis. *Ophthalmology* 2007; 114(2):325-333.
- 5) Drobecka E, et al. Ocular Manifestations in Sarcoidosis. *Klin Oczna* 1999; 101(3):201-204.
- 6) Atmaca LS, et al. Ocular Involvement in Sarcoidosis. *Ocul Immunol Inflamm* 2009; 17(2):91-94.
- 7) Baughman RP, et al. Clinical characteristics of patients in a case control study of sarcoidosis. *Am J Respir Crit Care Med* 2001; 164:1885-1889.
- 8) Judson MA, et al. The clinical course of sarcoidosis: presentation, diagnosis, and treatment in a large white and black cohort in the United States. *Sarc Vasc Diffuse Lung Dis* 2012; 29:119-127.
- 9) Jabs DA. Ocular sarcoidosis and chronic sarcoidosis. *Am J Ophthalmol* 1986; 102(3):297-301.
- 10) James DG, et al. Ocular sarcoidosis. *Br J Ophthalmol* 1964; 48:461-470.
- 11) Siltzbach LE, et al. Course and prognosis of sarcoidosis around the world. *Am J Med* 1974; 57:847-852.
- 12) Jackson H. Ocular sarcoidosis. *Postgrad Med J* 1970; 46:501-504.
- 13) Obenaus CD. Sarcoidosis and its ophthalmic manifestations. *Am J Ophthalmol* 1978; 86:648.
- 14) Khanna A, et al. Pattern of ocular sarcoidosis in patients with sarcoidosis in developing countries. *Acta Ophthalmologica Scandinavica* 2007; 85(6):609-612.
- 15) Sungar G, et al. Pattern of ocular findings in patients with biopsy-proven sarcoidosis in Turkey. *Ocular Immunology and Inflammation* 2013; 21(6):455-461.
- 16) Sheu SJ, et al. Ocular sarcoidosis in southern Taiwan. *Ocul Immunol Inflamm* 2010; 18(3):152-157.
- 17) Baughman, et al. Management of ocular sarcoidosis. *Sarc Vasc Diff Lung Dis* 2012; 29:26-33.
- 18) Morimoto T, et al. Epidemiology of sarcoidosis in Japan. *Eur Respir J* 2008; 31:371-379.

| Quality assessment                                                          |        |              |               |              |             | Effect               |  | Quality | Importance |
|-----------------------------------------------------------------------------|--------|--------------|---------------|--------------|-------------|----------------------|--|---------|------------|
| No of studies                                                               | Design | Risk of bias | Inconsistency | Indirectness | Imprecision | Other considerations |  |         |            |
| Detection of ocular sarcoidosis (frequency of abnormal eye examinations, %) |        |              |               |              |             |                      |  |         |            |

|                                                                |             |                      |                      |                      |                      |      |                                     |                     |     |
|----------------------------------------------------------------|-------------|----------------------|----------------------|----------------------|----------------------|------|-------------------------------------|---------------------|-----|
| 18 <sup>1</sup>                                                | Case series | serious <sup>2</sup> | serious <sup>3</sup> | serious <sup>4</sup> | serious <sup>5</sup> | none | 26%<br>(95% CI 23-29%)              | ⊕000<br>VERY<br>LOW | TBD |
| <b>Initiation of treatment (%)</b>                             |             |                      |                      |                      |                      |      |                                     |                     |     |
| 4 <sup>6</sup>                                                 | Case series | serious <sup>2</sup> | none                 | serious <sup>4</sup> | serious <sup>5</sup> | none | 83% <sup>7</sup><br>(95% CI 74-93%) | ⊕000<br>VERY<br>LOW | TBD |
| <b>Frequency of improvement or stabilization treatment (%)</b> |             |                      |                      |                      |                      |      |                                     |                     |     |
| 2 <sup>8</sup>                                                 | Case series | serious <sup>2</sup> | none                 | serious <sup>4</sup> | serious <sup>5</sup> | none | 64%<br>(95% CI 47-81%)              | ⊕000<br>VERY<br>LOW | TBD |

**Footnotes:**

<sup>1</sup>All studies.

<sup>2</sup>Many were retrospective chart reviews; therefore, there was a risk of selection bias.

<sup>3</sup>When pooled by meta-analysis, the I<sup>2</sup> >90%; thus, the median (range) are the primary outcomes for these outcomes rather than the pooled analyses. Also, the range is wide.

<sup>4</sup>The PICO question asks about patients without ocular symptoms; however, all of the studies enrolled both symptomatic and asymptomatic patients.

<sup>5</sup>A large proportion of the studies are small, with <100 patients.

<sup>6</sup>Baughman, Judson, Lee, and Ungprasert.

<sup>7</sup>Judson was eliminated as an outlier, bringing the I<sup>2</sup> from 98% to 0%.

<sup>8</sup>Lee and Ungprasert.

**QUESTION #4: Should patients with sarcoidosis who do not have renal symptoms undergo screening for renal sarcoidosis by routine serum creatinine testing?**

**Search strategy**

| #  | Searches                                                      |
|----|---------------------------------------------------------------|
| 1  | exp sarcoidosis/                                              |
| 2  | sarcoidosis/                                                  |
| 3  | sarcoidosis/ or sarcoidosis, pulmonary/ or uveoparotid fever/ |
| 4  | sarcoid\$.mp.                                                 |
| 5  | (besnier adj boeck\$).tw.                                     |
| 6  | (boeck\$ adj (disease or sarcoid)).tw.                        |
| 7  | (schaumann\$ adj (disease or syndrome)).tw.                   |
| 8  | uveoparoti\$.tw.                                              |
| 9  | (benign\$ adj lymphogranuloma\$).tw.                          |
| 10 | ((junging or heerfordt or lofgren) adj syndrome).tw.          |
| 11 | neurosarcoidosis.tw.                                          |
| 12 | (lupus adj pernio).tw.                                        |
| 13 | (idiopathic adj3 inflammat\$ adj3 granulomat\$).tw.           |
| 14 | or/1-13 [all sarcoidosis]                                     |
| 15 | exp Kidney Function Tests/                                    |
| 16 | Creatinine/                                                   |
| 17 | Urea/                                                         |

- 18 (creatinine adj2 (test\$ or excret\$)).mp.  
 (((kidney\$ or renal or uremi\$ or urea or urin\$) adj2 (test\$ or  
 19 function\$) or azotemi\$).mp.  
 20 (blood adj2 urea adj2 nitrogen).mp.  
 21 or/15-20  
 22 14 and 21

## Selected studies with outcomes

| Study                      | Test                         | Definition of abnormal test                                                     | Frequency of abnormal renal function | Biopsy results                                                                                                                                                                                                                                      | Renal function outcomes                                                                                                                                               |
|----------------------------|------------------------------|---------------------------------------------------------------------------------|--------------------------------------|-----------------------------------------------------------------------------------------------------------------------------------------------------------------------------------------------------------------------------------------------------|-----------------------------------------------------------------------------------------------------------------------------------------------------------------------|
| <b>More recent studies</b> |                              |                                                                                 |                                      |                                                                                                                                                                                                                                                     |                                                                                                                                                                       |
| <b>Baughman 2001</b>       | Serum Cr                     | Improvement of serum Cr post-immunosuppressant therapy                          | 5/736 (0.7%)                         | NR                                                                                                                                                                                                                                                  | Cannot be determined because improvement is part of definition                                                                                                        |
| <b>Bergner 2003</b>        | Serum Cr + 24-hr urine       | Serum Cr >1.2 mg/dL or urine protein >150 mg/24 hours                           | 15/46 (33%)                          | 10 performed - 5/10 (50%) nephrocalcinosis, 4/10 (40%) granulomatous interstitial nephritis, 1/10 (10%) non-granulomatous interstitial nephritis, and 2/10 (20%) IgA GN.                                                                            | 15 treated- 13/15 (87%) serum Cr improved [7 of which normalized] and 2/15 (13%) lost to follow-up; 8/15 (53%) proteinuria improved and 7/15 (47%) lost to follow-up. |
| <b>Morimoto 2008</b>       | Urine calcium                | Elevated urine calcium; threshold not defined                                   | 36/974 (3.7%)                        | NR                                                                                                                                                                                                                                                  | NR                                                                                                                                                                    |
| <b>Older studies</b>       |                              |                                                                                 |                                      |                                                                                                                                                                                                                                                     |                                                                                                                                                                       |
| <b>Lebacqz 1970</b>        | 24-hr urine + urine sediment | Proteinuria, urine calcium >200mg/24 hours, abnormal sediment, CrCl <100 mL/min | N/R                                  | 25 performed- 10/25 (40%) granulomas, 9/25 (36%) hyaline deposits, 8/25 (32%) interstitial inflammation, 4/25 (16%) glomerular hypercellularity, 2/25 (8%) interstitial fibrosis, 2/25 (8%) pericapsular fibrosis and adhesions, 1/25 (4%) amyloid. | 2/2 (100%) improved                                                                                                                                                   |
| <b>Lofgren 1957</b>        | 24-hr urine + urine sediment | Proteinuria, sediment with granular casts, CrCl <100 mL/min                     | 11/16 (69%)                          | 16 performed- 1/16 (16%) granular casts, 0/16/ (0%) nephrocalcinosis                                                                                                                                                                                | NR                                                                                                                                                                    |
| <b>MacSearraigh 1978</b>   | 24-hr urine                  | Proteinuria, urine calcium >5mmol/24 hours, CrCl <100 mL/min                    | 9/90 (10%)                           | 8 performed- 8/8 (100%) biopsies abnormal; 8/8 (100%) with more than one abnormality; 5/8 (63%) granulomas, 4/8 (50%) nephrocalcinosis; other                                                                                                       | 8/9 (89%) improved                                                                                                                                                    |

|                            |                               |                                               |                                    |                                                                                                                                                  |                        |
|----------------------------|-------------------------------|-----------------------------------------------|------------------------------------|--------------------------------------------------------------------------------------------------------------------------------------------------|------------------------|
| <b>Richmond 1981</b>       | Urine sediment + renal biopsy | Any abnormality of sediment or histopathology | 17/75 (23%)                        | 17 performed- 8/17 (47%) abnormal sediment, 7/17 (41%) nephrocalcinosis, 1/17 (6%) membranous GN, 1/17 (1%) granulomatous interstitial nephritis | NR                     |
| <b>Ricker 1949</b>         | Not specified                 | Not specified ("kidneys effected")            | 5/195 (3%)                         | Not confined to those with renal abnormalities                                                                                                   | NR                     |
| <i>Pooled (weighted)</i>   | N/A                           | N/A                                           | 7% <sup>1</sup><br>(95% CI 3-11%)  | N/A                                                                                                                                              | <i>Not estimable</i>   |
| <i>Pooled (unweighted)</i> |                               |                                               | 5% <sup>1</sup><br>(95% CI 4-6.3%) |                                                                                                                                                  | 88%<br>(95% CI 71-96%) |
| <i>Median (range)</i>      |                               |                                               | 10%<br>(0.7-69%)                   |                                                                                                                                                  | 89%<br>(87%-100%)      |

NR= not reported, Cr= creatinine, CrCl= creatinine clearance, GN= glomerulonephritis.

<sup>1</sup>After outliers removed

## Forest plots

Initial

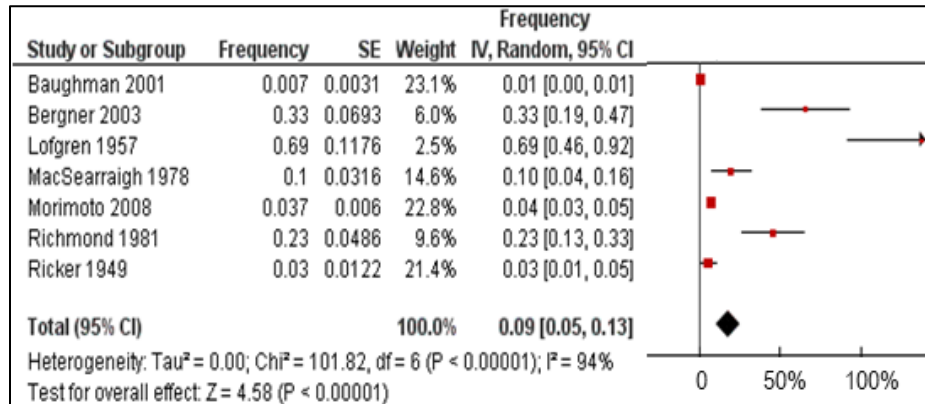

After removal of outliers

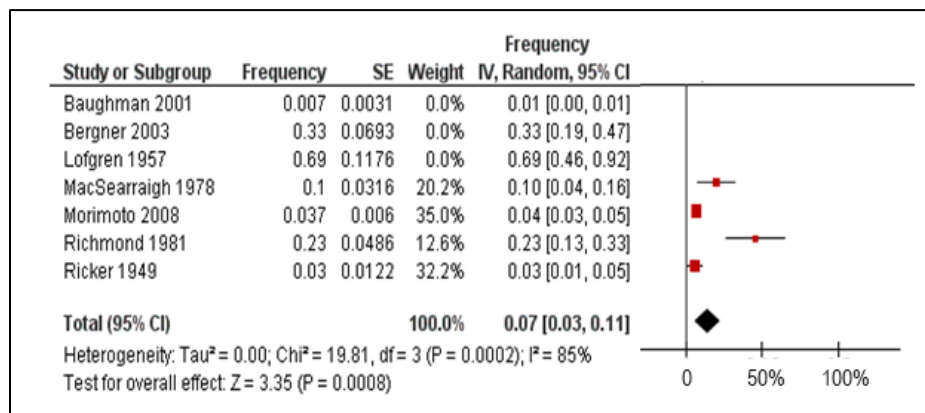



Treatment effect

*Meta-analysis not possible*

### Markov Model

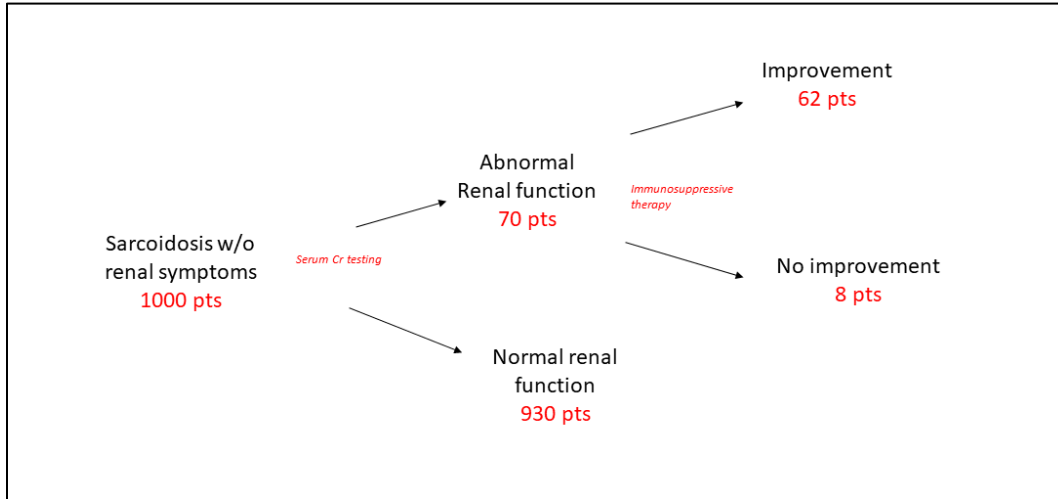

### Evidence profile

#### Bibliography:

- 1) Baughman RP, et al. Clinical characteristics of patients in a case control study of sarcoidosis. Am J Respir Crit Care Med 2001; 164:1885-1889.
- 2) Morimoto T, et al. Epidemiology of sarcoidosis in Japan. Eur Respir J 2008; 31:371-379.
- 3) Bergner R, et al. Frequency of kidney disease in chronic sarcoidosis. Sarc Vasc Diffuse Lung Dis 2003; 20(2):126.
- 4) Richmond JM, et al. Renal disease and sarcoidosis. Med J Aust 1981; 2(1):36-37.
- 5) Ricker W, et al. Sarcoidosis: A clinicopathologic review of 300 cases, including 22 autopsies. Am J Clin Pathol 1949; 19:725-749.
- 6) MacSearraigh ET, et al. Sarcoidosis with renal involvement. Postgrad Med J 1978; 56(634):528.
- 7) Lebacqz E, et al. Renal involvement in sarcoidosis. Postgrad Med J 1970; 46(538):526.
- 8) Lofgren S, et al. Renal complications in sarcoidosis; functional and biopsy studies. Acta Med Scand 1957; 159(4):295.

| Quality assessment                                                                                           |             |                      |                      |              |                      |                      | Effect                            | Quality          | Importance |
|--------------------------------------------------------------------------------------------------------------|-------------|----------------------|----------------------|--------------|----------------------|----------------------|-----------------------------------|------------------|------------|
| No of studies                                                                                                | Design      | Risk of bias         | Inconsistency        | Indirectness | Imprecision          | Other considerations |                                   |                  |            |
| <b>Detection of renal dysfunction (frequency of abnormal renal function testing, %)</b>                      |             |                      |                      |              |                      |                      |                                   |                  |            |
| 7 <sup>1</sup>                                                                                               | Case series | serious <sup>2</sup> | serious <sup>3</sup> | none         | serious <sup>4</sup> | none                 | 7% <sup>5</sup><br>(95% CI 3-11%) | ⊕○○○<br>VERY LOW | TBD        |
| <b>Improvement in renal dysfunction with treatment (frequency of improvement in renal function tests, %)</b> |             |                      |                      |              |                      |                      |                                   |                  |            |
| 3 <sup>6</sup>                                                                                               | Case series | serious <sup>2</sup> | serious <sup>3</sup> | none         | serious <sup>4</sup> | none                 | 88%<br>(95% CI 71-96%)            | ⊕○○○<br>VERY LOW | TBD        |

#### Footnotes:

- <sup>1</sup> All of the studies in the bibliography except Lebacqz.
- <sup>2</sup> Many were retrospective chart reviews; therefore, there was a risk of selection bias.
- <sup>3</sup> The studies were judged too different in the test used and the definition of an abnormal test to pool.
- <sup>4</sup> Likely, since 6/8 studies had <100 patients.
- <sup>5</sup> After removal of outliers.

**QUESTION #5: Should patients with sarcoidosis who do not have hepatic symptoms undergo screening for hepatic sarcoidosis by routine transaminase and alkaline phosphatase testing?**

**Search strategy**

| #  | Searches                                                      |
|----|---------------------------------------------------------------|
| 1  | exp sarcoidosis/                                              |
| 2  | sarcoidosis/                                                  |
| 3  | sarcoidosis/ or sarcoidosis, pulmonary/ or uveoparotid fever/ |
| 4  | sarcoid\$.mp.                                                 |
| 5  | (besnier adj boeck\$).tw.                                     |
| 6  | (boeck\$ adj (disease or sarcoid)).tw.                        |
| 7  | (schaumann\$ adj (disease or syndrome)).tw.                   |
| 8  | uveoparoti\$.tw.                                              |
| 9  | (benign\$ adj lymphogranuloma\$).tw.                          |
| 10 | ((junging or heerfordt or lofgren) adj syndrome).tw.          |
| 11 | neurosarcoidosis.tw.                                          |
| 12 | (lupus adj pernio).tw.                                        |
| 13 | (idiopathic adj3 inflammat\$ adj3 granulomat\$).tw.           |
| 14 | or/1-13 [all sarcoidosis]                                     |
| 15 | Liver Function Tests/                                         |
| 16 | alkaline phosphatase/                                         |
| 17 | exp Transaminases/                                            |
| 18 | ((hepati\$ or liver\$) adj (test\$ or function)).mp.          |
| 19 | (transmininase\$ or alkaline phosphatase or SGOP or SGPT).mp. |
| 20 | or/15-19                                                      |
| 21 | 14 and 20                                                     |

**Selected studies with outcomes**

| Study         | Freq. abnormal LFTs      | Biopsy granulomas | Initiation of therapy | LFT response to treatment | Progression to liver failure |
|---------------|--------------------------|-------------------|-----------------------|---------------------------|------------------------------|
| Cremers 2012  | 127/837 (15%)            | 21/22 (95%)       | NR                    | NR                        | NR                           |
| Kahi 2006     | 340/1436 (24%)           | 34/34 (100%)      | NR                    | NR                        | NR                           |
| Cowdell 1954  | 10/22 (45%) <sup>1</sup> | NR                | NR                    | NR                        | NR                           |
| Morimoto 2008 | 56/995 (5.6%)            | NR                | NR                    | NR                        | NR                           |
| Baughman 2001 | 85/736 (11.5%)           | NR                | NR                    | NR                        | NR                           |

|                                |                               |                                |                          |                                                                                                                                              |                                                                           |
|--------------------------------|-------------------------------|--------------------------------|--------------------------|----------------------------------------------------------------------------------------------------------------------------------------------|---------------------------------------------------------------------------|
| <b>Vatti<br/>1997</b>          | 44/125 (35%)                  | NR                             | 25/44 (57%) <sup>2</sup> | w/ therapy<br>12/25 (48%) improved,<br>13/25 (52%) unchanged<br>0/25 (0%) worsened                                                           | NR                                                                        |
|                                |                               |                                |                          | w/o therapy<br>10/19 (53%) improved<br>9/19 – unreported course                                                                              |                                                                           |
| <b>Ungprasert<br/>2017</b>     | 16/345 (5%) <sup>3</sup>      | 11/13 (85%)                    | 4/16 (25%) <sup>2</sup>  | w/ therapy<br>6/10 (60%) improved,<br>4/10 (40%) mixed response <sup>4</sup><br>0/10 (0%) worsened                                           | w/therapy <sup>5</sup><br>0/4 (0%) progressed to<br>cirrhosis             |
|                                |                               |                                |                          | w/o therapy<br>4/6 (67%) improved,<br>1/6 (16%) worsened<br>1/6 lost to follow-up.                                                           | w/o therapy <sup>5</sup><br>1/4 (25%) had cirrhosis at<br>diagnosis       |
| <b>Kennedy<br/>2006</b>        | 41/131 (31%)                  | NR                             | 39/41 (95%) <sup>2</sup> | w/therapy <sup>6</sup><br>15/24 (62%) resolution,<br>5/24 (21%) improved,<br>3/24 (13%) no response,<br>1/24 (5%) did not tolerate treatment | w/therapy <sup>6</sup><br>5/24 (21%) progressed to<br>cirrhosis           |
|                                |                               |                                |                          | w/o therapy <sup>6</sup><br>3/3 (100%) resolution<br>(12 not treated because cirrhotic)<br>(10 not treated because diagnosis<br>uncertain)   | w/o therapy <sup>6</sup><br>9/25 (36%) had cirrhosis at<br>diagnosis      |
| <b>Pooled<br/>(weighted)</b>   | <b>12%</b><br>(95% CI 6-19%)  | <b>Not estimable</b>           | <b>Did not assess</b>    | <b>38/59 (64%) versus 17/28 (61%)</b><br><b>RR 1.09 (95% CI 0.76 to 1.57)</b>                                                                | <b>5/28 (18%) vs. 10/29 (34%)</b><br><b>RR 0.54 (95% CI 0.22 to 1.33)</b> |
| <b>Pooled<br/>(unweighted)</b> | <b>16%</b><br>(95% CI 15-17%) | <b>96%</b><br>(95% CI 88- 99%) | <b>Did not assess</b>    | <b>38/59 (64%) versus 17/28 (61%)</b><br><b>RR 1.06 (95% CI 0.75 to 1.51)</b>                                                                | <b>5/28 (18%) vs. 10/29 (34%)</b><br><b>RR 0.52 (95% CI 0.20 to 1.33)</b> |
| <b>Median<br/>(range)</b>      | <b>20%</b><br>(5% to 45%)     | <b>95%</b><br>(85% to 100%)    | <b>Did not assess</b>    | <b>60% (48% to 83%) vs. 83% (53% to<br/>100%)</b>                                                                                            | <b>10% (0% to 21%) vs. 31%</b><br><b>(25% to 36%)</b>                     |

NR= not reported.

<sup>1</sup>In Cowdell, et al., only alkaline phosphatase was measured.

<sup>2</sup>In Vatti, et al., it is implied that therapy was initiated for liver disease. In Ungprasert, et al., 4/16 (25%) had therapy initiated due to abnormal liver disease, while an additional 6/16 (38%) had therapy initiated for other organ systems; therefore, overall 10/16 (63%) received therapy. In Kennedy et al., 39/41 (95%) had therapy initiated, but the article is unclear if initiated due to liver disease, co-existing lung disease, or both.

<sup>3</sup>Assumes that all patients enrolled had LFTs performed.

<sup>4</sup>Mixed responses = some LFTs improved while others stayed the same or worsened.

<sup>5</sup>Among treated for presumed hepatic sarcoidosis.

<sup>6</sup>Kennedy et al., included two cohorts. The first was 131 patients with sarcoidosis but mostly no symptoms, undergoing screening; this cohort was used to determine frequency of LFT abnormalities, frequency of positive biopsies, and frequency of new treatment. The second was 49 patients with presumed hepatic sarcoidosis; this cohort was used to determine effects of treatment on LFT abnormalities and progression to cirrhosis.

## Forest plots

### Frequency of abnormal LFTs

*Initial*

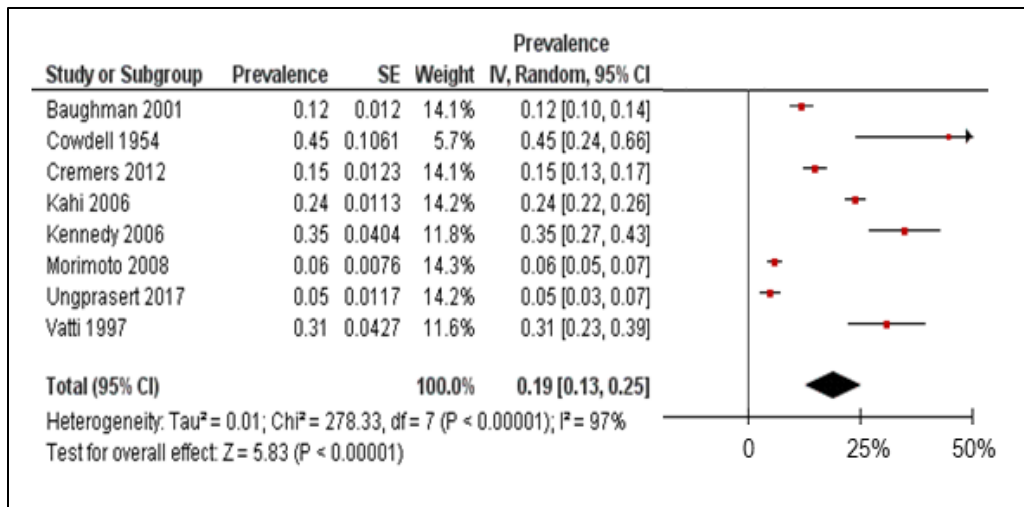

After removal of outliers

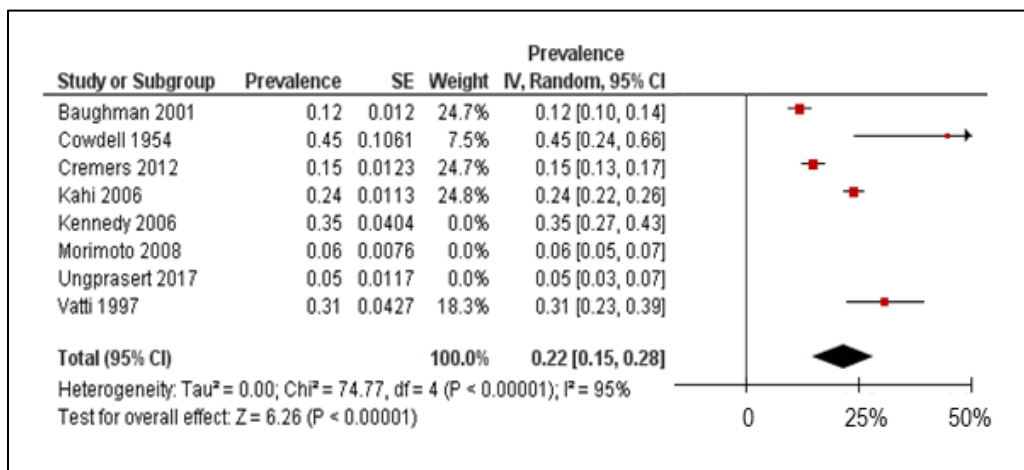

After removal of studies with N<300

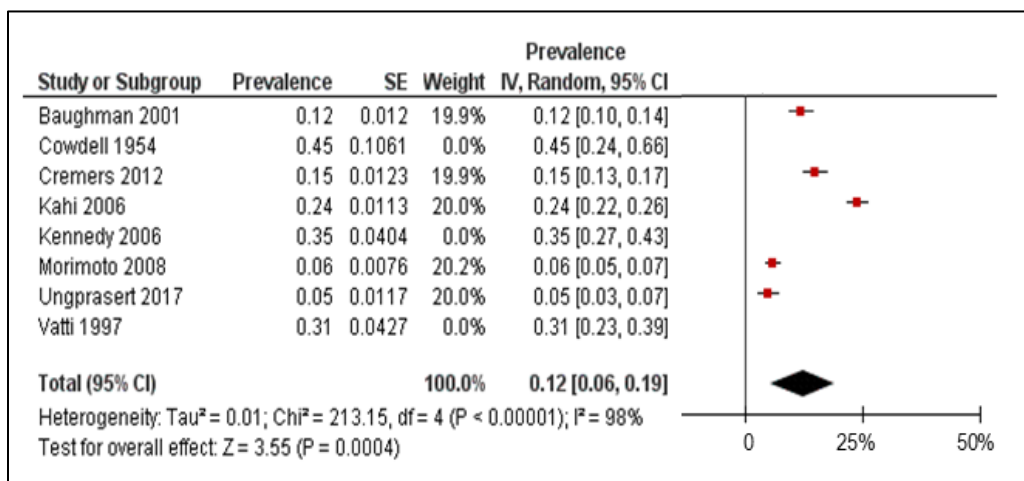

### Frequency of initiation of therapy

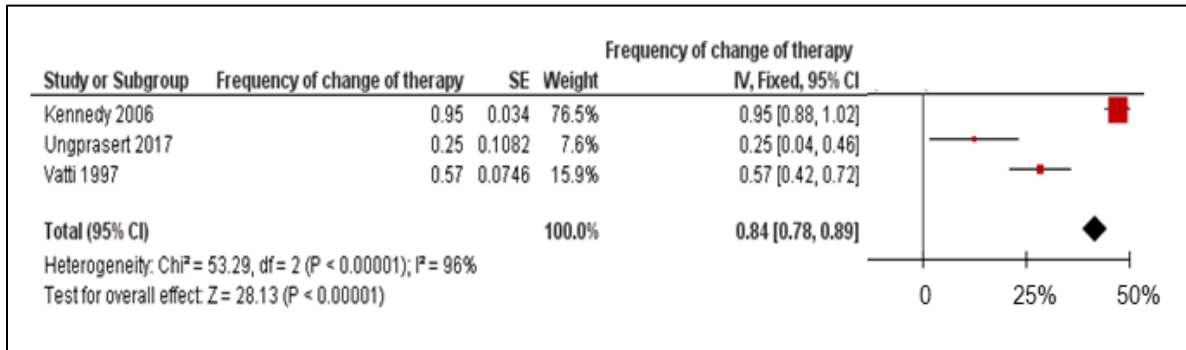

### Effect of treatment on resolution or improvement of LFTs

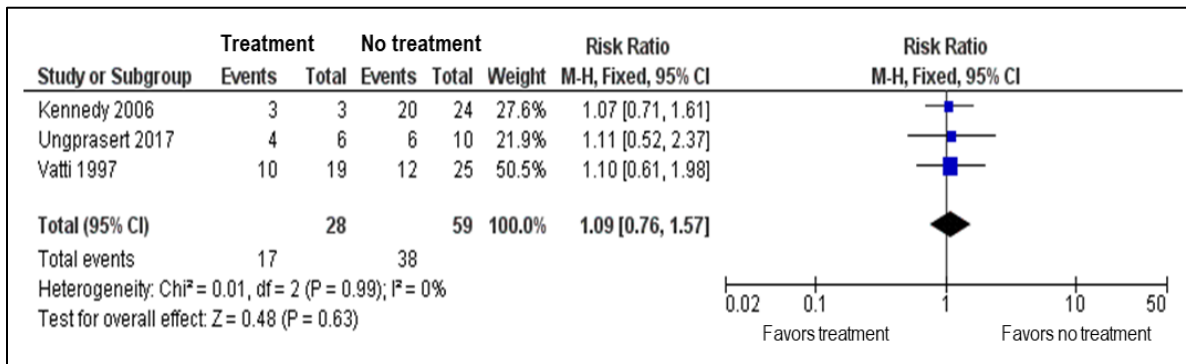

### Effect of treatment on progression to cirrhosis

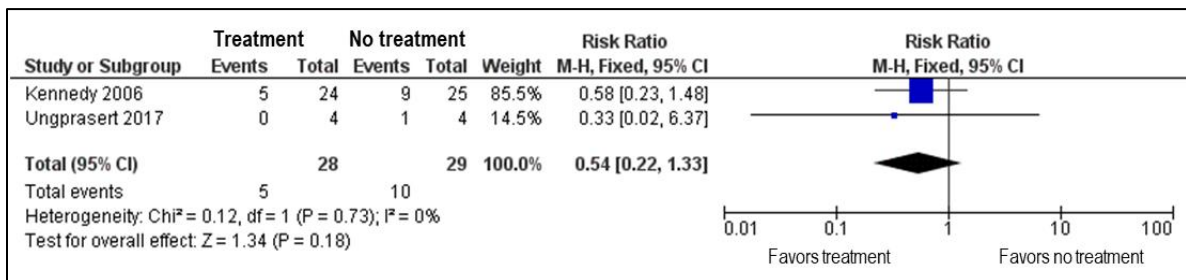

## Markov model

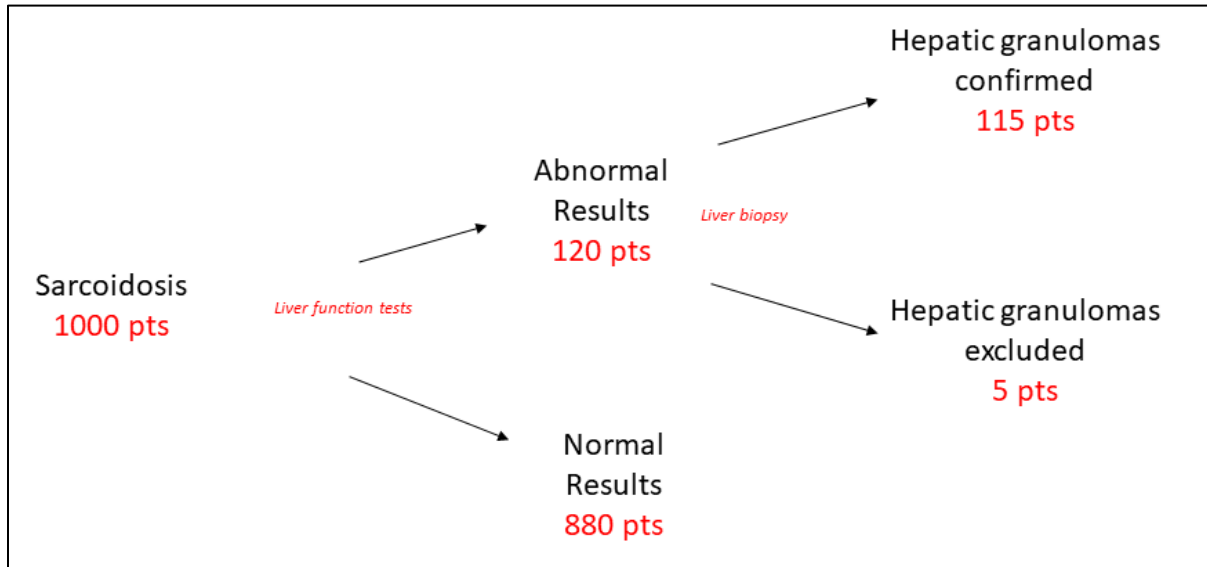

For every 1000 sarcoidosis patients without hepatic symptoms who undergo routine LFT testing, abnormalities will be found in roughly 120, 115 of whom will be confirmed to have hepatic granulomas and 5 of whom will not. Among treated patients, there is no difference in the rate of improvement of LFTs (64% vs. 61%, RR 1.09, 95% CI 0.76 – 1.57), but a trend toward less development of cirrhosis (18% vs. 34%, RR 0.54, 95% CI 0.22 – 1.33).

## Evidence profile

### Bibliography:

- 1) Cremers J, Drent M, Driessen A, Nieman F, Wijnen P, Baughman R, Koek G. Liver-test abnormalities in sarcoidosis. *Eur J Gastroenterol Hepatol.* 2012; 24(1):17-24.
- 2) Kahi CJ, Saxena R, Temkit M, Canlas K, Roberts S, Knox K, Wilkes D, Kwo PY. Hepatobiliary disease in sarcoidosis. *Sarcoidosis Vasc Diffuse Lung Dis.* 2006; 23(2):117-23.
- 3) Vatti R, Sharma OP. Course of asymptomatic liver involvement in sarcoidosis: role of therapy in selected cases. *Sarcoidosis Vasc Diffuse Lung Dis.* 1997; 14(1):73-6.
- 4) Ungprasert P et al. Clinical characteristics and outcome of hepatic sarcoidosis: A population-based study 1976-2013. *Am J Gastroenterol* 2017; 112(10):1556-1563.
- 5) Kennedy PT, et al. Natural history of hepatic sarcoidosis and its response to treatment. *Eur J Gastroenterol Hepatol* 2006; 18(7):721-726.
- 6) Baughman RP, et al. Clinical characteristics of patients in a case control study of sarcoidosis. *Am J Respir Crit Care Med* 2001; 164:1885-1889.
- 7) Morimoto T, et al. Epidemiology of sarcoidosis in Japan. *Eur Respir J* 2008; 31:371-379.
- 8) Cowdell RH. Sarcoidosis: a special reference to diagnosis and prognosis. *Quart J Med* 1954; 23:29.

| Quality assessment                                                                    |             |                      |                      |                      |                      |                      | Effect                | Quality          | Importance |
|---------------------------------------------------------------------------------------|-------------|----------------------|----------------------|----------------------|----------------------|----------------------|-----------------------|------------------|------------|
| No of studies                                                                         | Design      | Risk of bias         | Inconsistency        | Indirectness         | Imprecision          | Other considerations |                       |                  |            |
| <b>Detection of liver dysfunction (frequency of abnormal liver function tests, %)</b> |             |                      |                      |                      |                      |                      |                       |                  |            |
| 8 <sup>1</sup>                                                                        | Case series | serious <sup>2</sup> | serious <sup>3</sup> | serious <sup>4</sup> | serious <sup>5</sup> | none                 | 12%<br>(95% CI 6-19%) | ⊕○○○<br>VERY LOW | TBD        |
| <b>Initiation of treatment (%)</b>                                                    |             |                      |                      |                      |                      |                      |                       |                  |            |

|                                                                                               |             |                      |                      |                      |                      |      |                                  |                  |     |
|-----------------------------------------------------------------------------------------------|-------------|----------------------|----------------------|----------------------|----------------------|------|----------------------------------|------------------|-----|
| 3 <sup>6</sup>                                                                                | Case series | serious <sup>2</sup> | serious <sup>3</sup> | serious <sup>4</sup> | serious <sup>5</sup> | none | Did not assess <sup>6</sup>      | ⊕000<br>VERY LOW | TBD |
| <b>Improvement in liver dysfunction (frequency of improvement in liver function tests, %)</b> |             |                      |                      |                      |                      |      |                                  |                  |     |
| 3 <sup>7</sup>                                                                                | Case series | serious <sup>2</sup> | none                 | serious <sup>4</sup> | serious <sup>8</sup> | none | RR 1.09<br>(95% CI 0.76 to 1.57) | ⊕000<br>VERY LOW | TBD |
| <b>Progression to liver failure (frequency of development of cirrhosis, %)</b>                |             |                      |                      |                      |                      |      |                                  |                  |     |
| 2 <sup>9</sup>                                                                                | Case series | serious <sup>2</sup> | none                 | serious <sup>4</sup> | serious <sup>8</sup> | none | RR 0.52<br>(95% CI 0.20 to 1.33) | ⊕000<br>VERY LOW | TBD |
| <b>Liver transplantation (%)</b>                                                              |             |                      |                      |                      |                      |      |                                  |                  |     |
| 0                                                                                             | -           | -                    | -                    | -                    | -                    | -    | -                                | -                | TBD |
| <b>Mortality (%)</b>                                                                          |             |                      |                      |                      |                      |      |                                  |                  |     |
| 0                                                                                             | -           | -                    | -                    | -                    | -                    | -    | -                                | -                | TBD |

**Footnotes:**

<sup>1</sup> Cremers, Kahi, Vatti, Ungprasert, Kennedy, Baughman, Morimoto, and Cowdell.

<sup>2</sup> Many were retrospective chart reviews; therefore, there was a risk of selection bias.

<sup>3</sup> When pooled by meta-analysis, the I<sup>2</sup> >90%; thus, eliminated outliers and small studies before reporting summary statistic.

<sup>4</sup> The PICO question asks about patients without hepatic symptoms; however, only one statement explicitly stated that the patients had no hepatic symptoms.

<sup>5</sup> The 95% CI for prevalence is >10%.

<sup>6</sup> The results of the study were so disparate, that a summary statistic is not reported.

<sup>7</sup> Vatti, Ungprasert, and Kennedy.

<sup>8</sup> The confidence intervals are wide; the ends will lead to opposite clinical decisions.

<sup>9</sup> Ungprasert and Kennedy.

**QUESTION #6: Should patients with sarcoidosis who do not have symptoms or signs of hypercalcemia undergo screening for abnormal calcium metabolism by routine serum calcium and vitamin D testing?**

**Search strategy**

| #  | Searches                                                      |
|----|---------------------------------------------------------------|
| 1  | exp sarcoidosis/                                              |
| 2  | sarcoidosis/                                                  |
| 3  | sarcoidosis/ or sarcoidosis, pulmonary/ or uveoparotid fever/ |
| 4  | sarcoid\$.mp.                                                 |
| 5  | (besnier adj boeck\$).tw.                                     |
| 6  | (boeck\$ adj (disease or sarcoid)).tw.                        |
| 7  | (schaumann\$ adj (disease or syndrome)).tw.                   |
| 8  | uveoparoti\$.tw.                                              |
| 9  | (benign\$ adj lymphogranuloma\$).tw.                          |
| 10 | ((junging or heerfordt or lofgren) adj syndrome).tw.          |
| 11 | neurosarcoidosis.tw.                                          |
| 12 | (lupus adj pernio).tw.                                        |
| 13 | (idiopathic adj3 inflammat\$ adj3 granulomat\$).tw.           |

- 14 or/1-13 [all sarcoidosis]
- 15 calcium/
- 16 exp vitamin D/
- 17 (hypercalcem\$ or calcium or vitamin D).mp.
- 18 15 or 16 or 17
- 19 14 and 18

### Selected studies with outcomes

| Study                      | Frequency of hypercalcemia                           | Definition of hypercalcemia              | Initiation of therapy | Course of calcium outcomes                                             | Course of clinical outcomes                                                                |
|----------------------------|------------------------------------------------------|------------------------------------------|-----------------------|------------------------------------------------------------------------|--------------------------------------------------------------------------------------------|
| <b>Baughman 2001</b>       | 27/736 (3.7%)                                        | Increased serum Ca w/o alternative cause | NR                    | NR                                                                     | NR                                                                                         |
| <b>Baughman 2013</b>       | 97/1606 (6%)                                         | Ca > 10.2 mg/dL                          | Implied 97/97 (100%)  | 81/86 (94%) improved<br>78/86 (91%) resolved<br>11/97 (6%) lost to f/u | 41/97 (42%) developed renal failure<br>20/37 (54%) normalized renal failure with treatment |
| <b>Morimoto 2008</b>       | 62/842 (7.4%)                                        | Not specified                            | NR                    | NR                                                                     | NR                                                                                         |
| <b>Bergner 2003</b>        | 11/46 (24%)                                          | Not specified                            | NR                    | “Decreased to normal range rapidly”                                    | NR                                                                                         |
| <b>Lebacq 1970</b>         | 17/152 (11%)                                         | Ca > 11 mg/dL                            | NR                    | NR                                                                     | NR                                                                                         |
| <b>Mayock 1963</b>         | 18/97 (19%)                                          | Ca > 11 mg/dL                            | NR                    | NR                                                                     | NR                                                                                         |
| <b>McCort 1947</b>         | 5/16 (31%)                                           | Ca > 11 mg/dL                            | NR                    | NR                                                                     | NR                                                                                         |
| <b>Longcope 1952</b>       | 11/44 (25%)                                          | Ca > 11 mg/dL                            | NR                    | NR                                                                     | NR                                                                                         |
| <b>James 1956</b>          | 1/150 (0.8%)                                         | Not specified                            | NR                    | NR                                                                     | NR                                                                                         |
| <b>Ferguson 1958</b>       | 1/29 (3.4%)                                          | Not specified                            | NR                    | NR                                                                     | NR                                                                                         |
| <b>Cummings 1959</b>       | 40/113 (35%)                                         | Ca > 11 mg/dL                            | NR                    | NR                                                                     | NR                                                                                         |
| <b>Pooled (weighted)</b>   | <b>6% (95% CI 4-8%)<br/>Newer study subgroup</b>     | <i>Not estimable</i>                     | <i>Did not assess</i> | <b>&gt;90% resolution<br/>Single study</b>                             | <b>&gt;40% renal failure<br/>&gt;50% resolution<br/>Single study</b>                       |
| <b>Pooled (unweighted)</b> | <b>6.1% (95% CI 5.3-7%)<br/>Newer study subgroup</b> | <i>Not estimable</i>                     | <i>Did not assess</i> | <b>&gt;90% resolution<br/>Single study</b>                             | <b>&gt;40% renal failure<br/>&gt;50% resolution<br/>Single study</b>                       |



|                       |                                                   |                      |                       |                                            |                                                                      |
|-----------------------|---------------------------------------------------|----------------------|-----------------------|--------------------------------------------|----------------------------------------------------------------------|
| <i>Median (range)</i> | <i>6.7% (3.7% - 24%)<br/>Newer study subgroup</i> | <i>Not estimable</i> | <i>Did not assess</i> | <i>&gt;90% resolution<br/>Single study</i> | <i>&gt;40% renal failure<br/>&gt;50% resolution<br/>Single study</i> |
|-----------------------|---------------------------------------------------|----------------------|-----------------------|--------------------------------------------|----------------------------------------------------------------------|

## Forest plots

### Prevalence of hypercalcemia

#### Initial

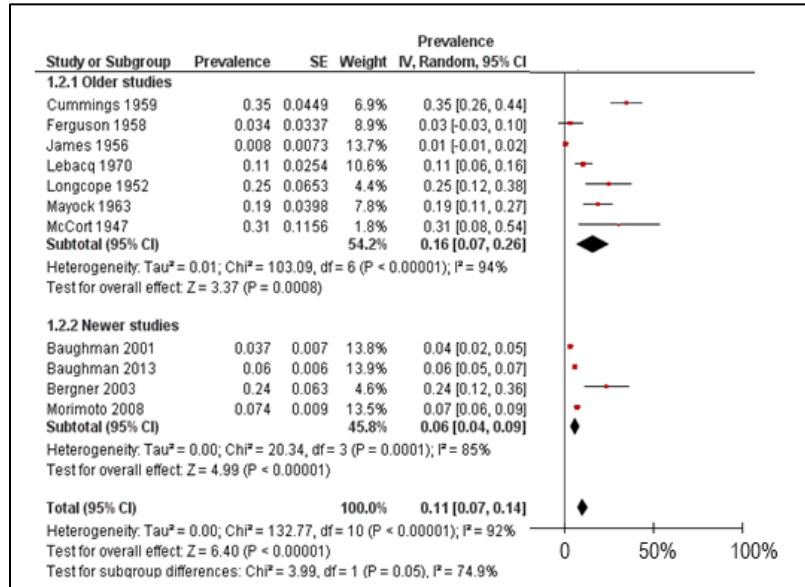

#### After removal of outliers

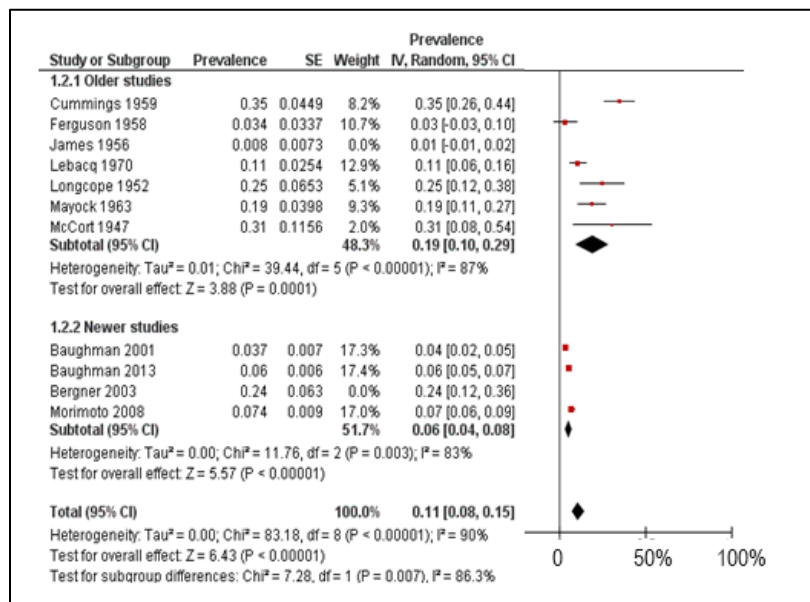

## Markov model

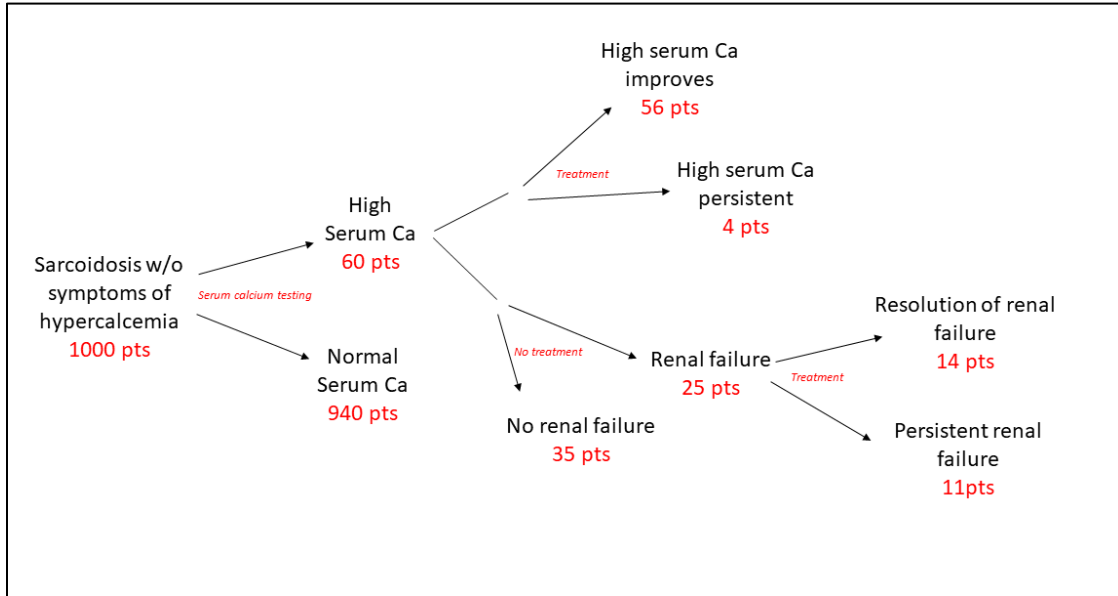

## Evidence profile

### Bibliography:

- 1) Baughman RP, et al. Clinical characteristics of patients in a case control study of sarcoidosis. Am J Respir Crit Care Med 2001; 164:1885-1889.
- 2) Baughman RP, et al. Calcium and Vitamin D metabolism in sarcoidosis. Sarc Vasc Diffuse Lung Dis 2013; 30:113-120.
- 3) Morimoto T, et al. Epidemiology of sarcoidosis in Japan. Eur Respir J 2008; 31:371-379.
- 4) Bergner R, et al. Frequency of kidney disease in chronic sarcoidosis. Sarc Vasc Diffuse Lung Dis 2003; 20(2):126.
- 5) Lebacqz E, et al. Renal involvement in sarcoidosis. Postgrad Med J 1970; 46(538):526.
- 6) Mayock, et al. Manifestations of sarcoidosis: Analysis of 145 patients with a review of nine series selected from the literature. Am J Med 1963; 35:67-89.
- 7) McCort JJ, et al. A clinical and roentgenologic study of twenty-eight proved cases. Arch Intern Med 1947; 80:293.
- 8) Longcope WT, et al. A study of sarcoidosis. Based on a combined investigation of one hundred sixty cases including thirty autopsies from JHH and MGH. Medicine 1952; 31:1.
- 9) James D. Diagnosis and treatment of sarcoidosis. BMJ 1956; 2:900.
- 10) Ferguson RH, et al. Sarcoidosis study of twenty-nine cases, with a review of splenic, hepatic, mucus membrane, retinal, and joint manifestations. Arch Int Med 1958; 101:1065.
- 11) Cummings MM. Epidemiologic and clinical observations in sarcoidosis. Ann Int Med 1959; 50:879.

| Quality assessment                                                                     |             |                      |                      |              |             |                      | Effect                         | Quality          | Importance |
|----------------------------------------------------------------------------------------|-------------|----------------------|----------------------|--------------|-------------|----------------------|--------------------------------|------------------|------------|
| No of studies                                                                          | Design      | Risk of bias         | Inconsistency        | Indirectness | Imprecision | Other considerations |                                |                  |            |
| <b>Prevalence of hypercalcemia (frequency of abnormal serum calcium tests, %)</b>      |             |                      |                      |              |             |                      |                                |                  |            |
| 11 <sup>1</sup>                                                                        | Case series | serious <sup>2</sup> | serious <sup>3</sup> | none         | none        | none                 | 6%<br>(95% CI 4-8%)            | ⊕○○○<br>VERY LOW | TBD        |
| <b>Incidence of renal failure (frequency of patients who develop renal failure, %)</b> |             |                      |                      |              |             |                      |                                |                  |            |
| 1 <sup>4</sup>                                                                         | Case series | serious <sup>2</sup> | serious <sup>3</sup> | none         | none        | none                 | 41/97 (42%)<br>(95% CI 33-52%) | ⊕○○○<br>VERY LOW | TBD        |
| <b>Response to treatment (% patients whose serum calcium improved)</b>                 |             |                      |                      |              |             |                      |                                |                  |            |

|                                                                        |             |                      |                      |      |      |      |                                |                  |     |
|------------------------------------------------------------------------|-------------|----------------------|----------------------|------|------|------|--------------------------------|------------------|-----|
| 1 <sup>4</sup>                                                         | Case series | serious <sup>2</sup> | serious <sup>3</sup> | none | none | none | 81/86 (94%)<br>(95% CI 87-97%) | ⊕○○○<br>VERY LOW | TBD |
| <b>Response to treatment (% patients whose renal failure resolved)</b> |             |                      |                      |      |      |      |                                |                  |     |
| 1 <sup>4</sup>                                                         | Case series | serious <sup>2</sup> | serious <sup>3</sup> | none | none | none | 20/37 (54%)<br>(95% CI 38-69%) | ⊕○○○<br>VERY LOW | TBD |

**Footnotes:**

<sup>1</sup> All studies listed in the bibliography.

<sup>2</sup> Many were retrospective chart reviews; therefore, there was a risk of selection bias.

<sup>3</sup> When pooled by meta-analysis, the I<sup>2</sup> >90%; thus, looked at subgroups and eliminated outliers before reporting summary statistic.

<sup>4</sup> Baughman 2013.

**QUESTION #7: Should patients with sarcoidosis who do not have hematological symptoms undergo screening for bone marrow involvement by routine complete blood cell count testing?**

**Search strategy**

| #  | Searches                                                         |
|----|------------------------------------------------------------------|
| 1  | exp bone marrow cells/                                           |
| 2  | exp blood cells/                                                 |
| 3  | bone marrow.mp.                                                  |
| 4  | ((Progenitor or Precursor or Hematopoietic) adj2 Cell\$).mp.     |
| 5  | (Megakaryocyt\$ or Monocyt or Reticulocyt\$).mp.                 |
| 6  | (Blood Platelet\$ or Erythrocyt\$ or Hemocyt\$).mp.              |
| 7  | (Granulocyt\$ or Basophil\$ or Eosinophil\$ or Neutrophil\$).mp. |
| 8  | (Lymphocyt\$ or Monocyt\$).mp.                                   |
| 9  | (Leukocyt\$ or (Killer adj cell\$)).mp.                          |
| 10 | or/1-9                                                           |
| 11 | exp sarcoidosis/                                                 |
| 12 | sarcoidosis/                                                     |
| 13 | sarcoidosis/ or sarcoidosis, pulmonary/ or uveoparotid fever/    |
| 14 | sarcoid\$.mp.                                                    |
| 15 | (besnier adj boeck\$).tw.                                        |
| 16 | (boeck\$ adj (disease or sarcoid)).tw.                           |
| 17 | (schaumann\$ adj (disease or syndrome)).tw.                      |
| 18 | uveoparoti\$.tw.                                                 |
| 19 | (benign\$ adj lymphogranuloma\$).tw.                             |
| 20 | ((junging or heerfordt or lofgren) adj syndrome).tw.             |
| 21 | neurosarcoidosis.tw.                                             |
| 22 | (lupus adj pernio).tw.                                           |
| 23 | (idiopathic adj3 inflammat\$ adj3 granulomat\$).tw.              |
| 24 | or/11-23 [all sarcoidosis]                                       |
| 25 | mass screening/                                                  |

26 "Risk Assessment"/  
 27 (screen\$ or surveil\$ or follow-up\$).mp.  
 28 exp screening/  
 29 or/25-28  
 30 10 and 24 [Sarcoidosis and blood cells]  
 31 10 and 24 and 29 [Sarcoidosis and blood cells and screening]  
 32 30 not 31

### Selected studies with outcomes

| Study                             | Definition of anemia    | Frequency of anemia                 | Definition of leukopenia | Frequency of leukopenia                                                 | Definition of lymphopenia | Frequency of lymphopenia             |
|-----------------------------------|-------------------------|-------------------------------------|--------------------------|-------------------------------------------------------------------------|---------------------------|--------------------------------------|
| Yarnardag, et al. 2002            | NR                      | 11/50 (22%)                         | NR                       | NR                                                                      | NR                        | NR                                   |
| Gupta, et al. 2002                | Hgb <11.5 g/dL          | 4/30 (13.3%)                        | <4000 /mm <sup>3</sup>   | 1/30 (3.3%)                                                             | <1500 /mm <sup>3</sup>    | 8/30 (27%)                           |
| Sharma, et al. 2001               | Hgb <11.5 g/dL          | 29/106 (27%)                        | <4000 /mm <sup>3</sup>   | 4/106 (4%)                                                              | <1500 /mm <sup>3</sup>    | NR                                   |
| Baughman, et al. 2001             | NR                      | 29/736 (3.9%)                       | NR                       | NR                                                                      | NR                        | NR                                   |
| Lower, et al. 1988                | NR                      | 21/75 (28%)                         | NR                       | NR                                                                      | NR                        | 41/75 (55%)                          |
| Mayock, et al. 1963               | Hgb <11.0 g %           | 31/144 (22%)                        | <5000 /mm <sup>3</sup>   | 43/144 (30%)                                                            | NR                        | NR                                   |
| Cummings, et al. 1959             | NR                      | NR                                  | <5000 /mm <sup>3</sup>   | 51/175 (29%)                                                            | NR                        | NR                                   |
| Ferguson, et al. 1958             | Hgb <11.0 g/dL          | 1/29 (3.4%)                         | <5000 /mm <sup>3</sup>   | 7/29 (24%)                                                              | NR                        | NR                                   |
| Israel, et al. 1958               | NR                      | NR                                  | <5000 /mm <sup>3</sup>   | 60/160 (38%)                                                            | NR                        | NR                                   |
| McCort, et al. 1947               | RBC < 4x10 <sup>6</sup> | 2/28 (7.1%)                         | <4500 /mm <sup>3</sup>   | 7/28 (25%)                                                              | NR                        | NR                                   |
| <i>Pooled result (weighted)</i>   | <i>NR</i>               | <i>15%</i><br><i>95% CI 7%-23%</i>  | <i>NR</i>                | <i>4%</i><br><i>95% CI 1-7%</i><br><i>4000 mm<sup>3</sup> subgroup</i>  | <i>NR</i>                 | <i>42%</i><br><i>(95% CI 14-69%)</i> |
| <i>Pooled result (unweighted)</i> | <i>NR</i>               | <i>26%</i><br><i>95% CI 22%-30%</i> | <i>NR</i>                | <i>4%</i><br><i>95% CI 3%-8%</i><br><i>4000 mm<sup>3</sup> subgroup</i> | <i>NR</i>                 | <i>47%</i><br><i>(95% CI 37-56%)</i> |
| <i>Median (range)</i>             | <i>NR</i>               | <i>17%</i><br><i>(3% to 28%)</i>    | <i>NR</i>                | <i>3.5%</i><br><i>(3% to 4%)</i><br><i>4000 mm<sup>3</sup> subgroup</i> | <i>NR</i>                 | <i>41%</i><br><i>(27% to 55%)</i>    |

| Study                  | Frequency of granulomas on bone marrow biopsy                                                       | Frequency of treatment being changed | Notes                                                                                 |
|------------------------|-----------------------------------------------------------------------------------------------------|--------------------------------------|---------------------------------------------------------------------------------------|
| Yarnardag, et al. 2002 | 3/11 (27%) of pts. with anemia had granulomas in bone marrow; 7/11 (65%) had iron deficiency anemia | NR                                   | NR                                                                                    |
| Gupta, et al. 2002     | NR                                                                                                  | NR                                   | 4/30 (13.3%) sarcoid patients had anemia;<br>3/30 (13.3%) healthy patients had anemia |
| Sharma, et al. 2001    | NR                                                                                                  | NR                                   | NR                                                                                    |

|                                   |                                                                                      |            |                                                                              |
|-----------------------------------|--------------------------------------------------------------------------------------|------------|------------------------------------------------------------------------------|
| Baughman, et al. 2001             | NR                                                                                   | NR         | NR                                                                           |
| Lower, et al. 1988                | 9/17 (53%) of pts. with anemia had granulomas in bone marrow; no alternative anemias | NR         | NR                                                                           |
| Mayock, et al. 1963               | NR                                                                                   | NR         | NR                                                                           |
| Cummings, et al. 1959             | NR                                                                                   | NR         | NR                                                                           |
| Ferguson, et al. 1958             | NR                                                                                   | NR         | Abnormalities occurred "on occasion"                                         |
| Israel, et al. 1958               | NR                                                                                   | NR         | NR                                                                           |
| McCort, et al. 1947               | NR                                                                                   | NR         | For most pts. the abnormality was seen on one measurement and didn't persist |
| <b>Pooled result (weighted)</b>   | <b>38%</b><br><b>(95% CI 13-64%)</b>                                                 | <b>N/A</b> | <b>N/A</b>                                                                   |
| <b>Pooled result (unweighted)</b> | <b>43%</b><br><b>(95% CI 27-61)</b>                                                  | <b>N/A</b> | <b>N/A</b>                                                                   |
| <b>Median (range)</b>             | <b>40%</b><br><b>(27% to 53%)</b>                                                    | <b>N/A</b> | <b>N/A</b>                                                                   |

## Forest plots

### Frequency of anemia

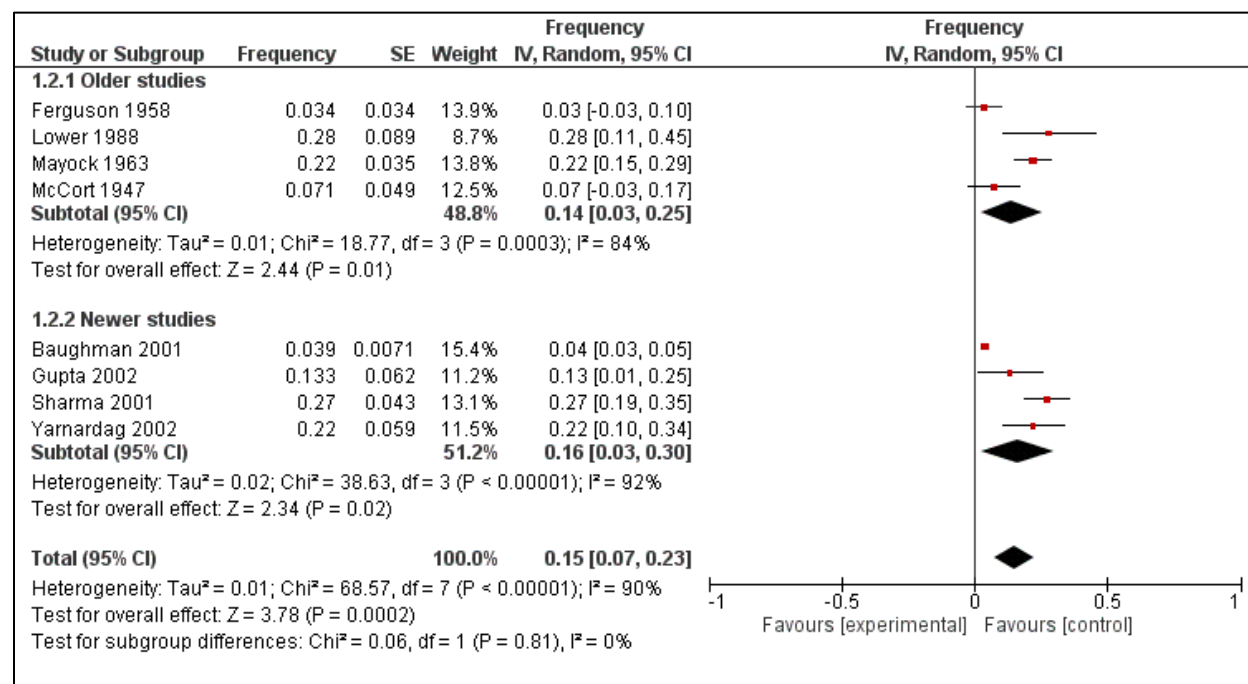

### Frequency of leukopenia

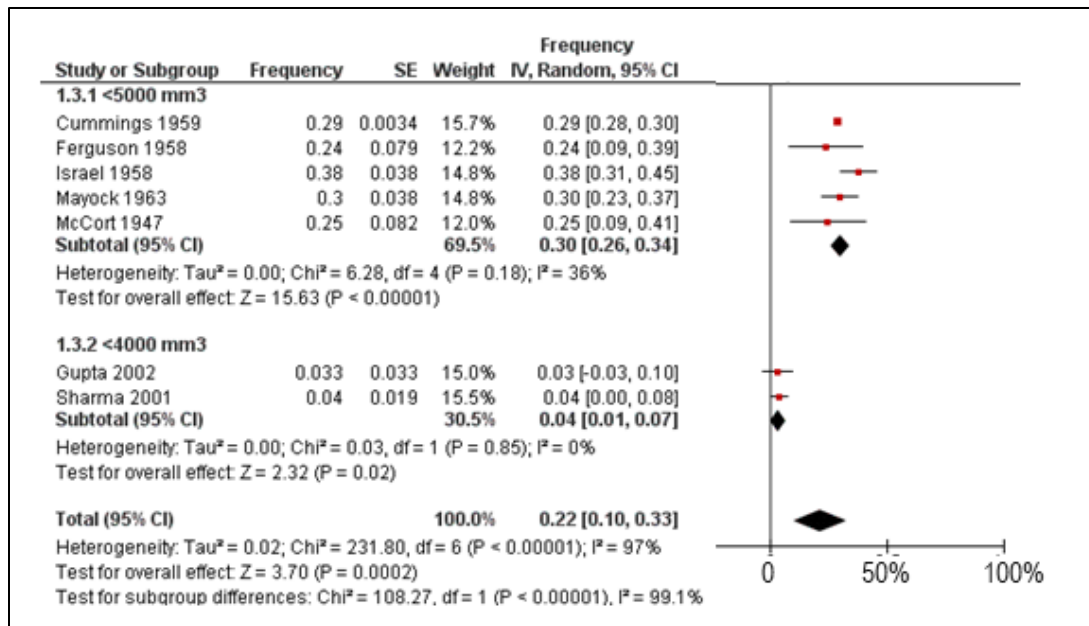

### Frequency of lymphopenia

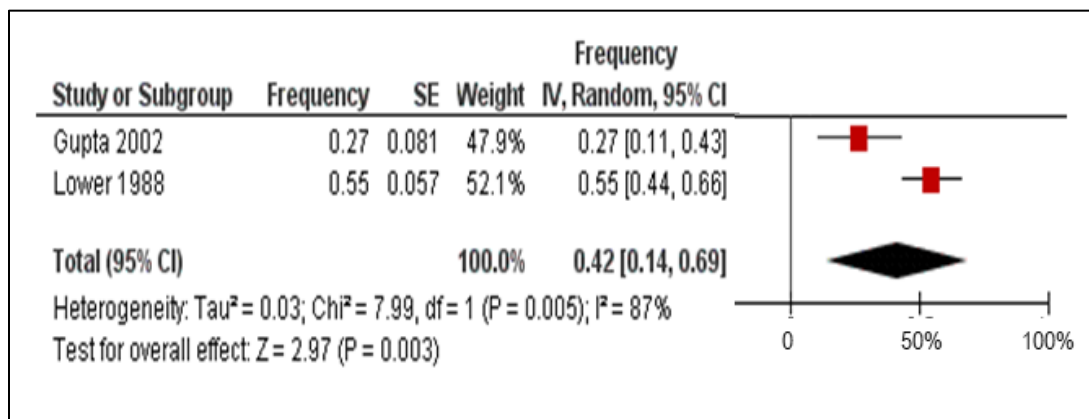

### Frequency of bone marrow granulomas among those with anemia

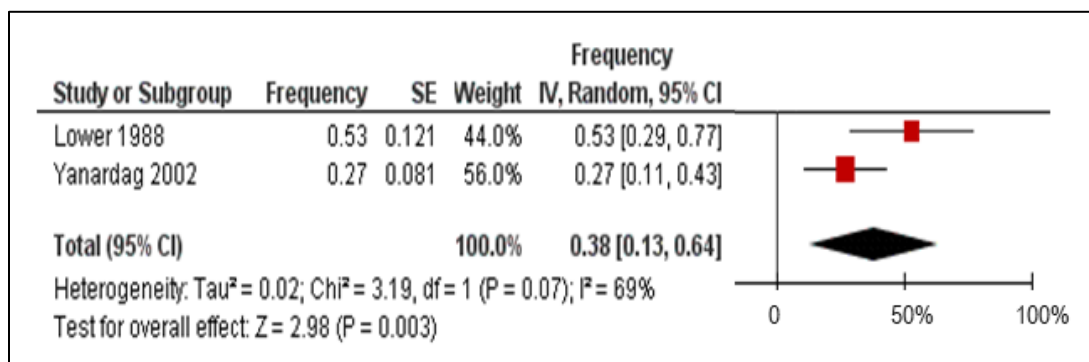

## Markov model

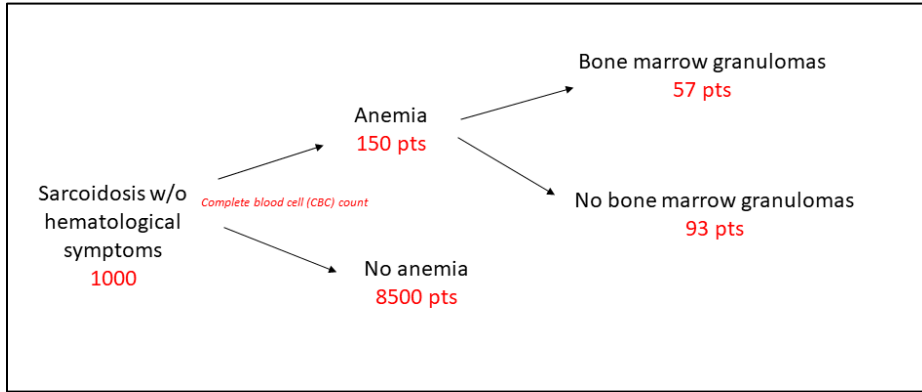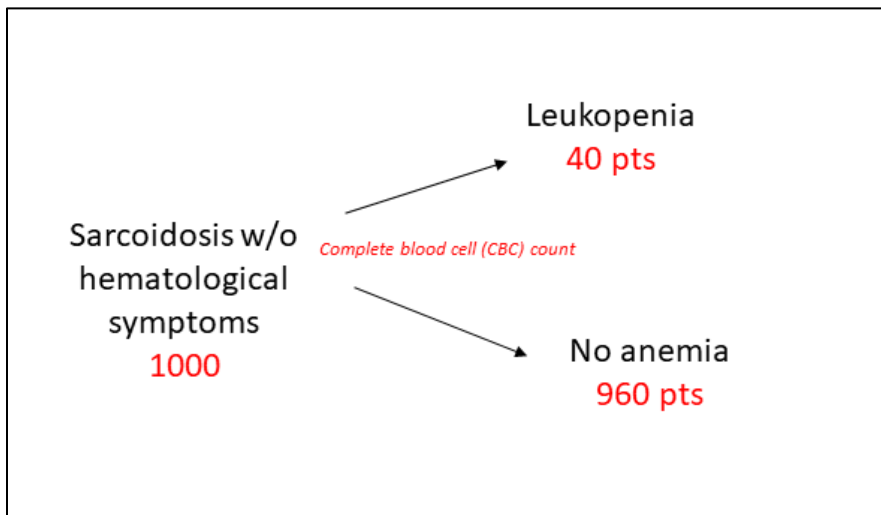

## Evidence profile

**Comparison:** Complete blood cell count versus none

### Bibliography:

- 1) Lower EE, et al. The anemia of sarcoidosis. Sarcoidosis 1988; 5(1):51-55.
- 2) Yanardag H, et al. Bone marrow involvement in sarcoidosis: an analysis of 50 bone marrow samples. Haematologia (Budap) 2002; 32(4):419-425.
- 3) Gupta D, et al. Haematological abnormalities in patients of sarcoidosis. Indian J Chest Dis All Sci 2002; 44(4):233-236.
- 4) Mayock, et al. Manifestations of Sarcoidosis: Analysis of 145 Patients with a Review of Nine Series Selected from the Literature. Am J Med 1963; 35:67-89.
- 5) Sharma SK, et al. Clinical characteristics, pulmonary function abnormalities, and outcome of prednisolone treatment in 106 patients with sarcoidosis. J Assoc Physicians India 2001; 49:697-704.
- 6) McCort JJ, et al. Sarcoidosis-- A clinical and roentgenographic study of 28 proved cases. Arch Intern Med 1947; 80:293.
- 7) Ferguson RH, et al. Sarcoidosis. Study of 29 cases, with review of splenic, hepatic, mucous membrane, retinal, and joint manifestations. Arch Intern Med 1958; 101:1065.
- 8) Israel HL, et al. Sarcoidosis. Clinical observations on one hundred and sixty cases. Arch Intern Med 1958; 102:766.
- 9) Cummings MM, et al. Epidemiologic and clinical observations in sarcoidosis. Ann Intern Med 1959; 50:879.

| Quality assessment |        |              |               |              |             |                      | Effect | Quality | Importance |
|--------------------|--------|--------------|---------------|--------------|-------------|----------------------|--------|---------|------------|
| No of studies      | Design | Risk of bias | Inconsistency | Indirectness | Imprecision | Other considerations |        |         |            |
|                    |        |              |               |              |             |                      |        |         |            |

| Detection of anemia (frequency of anemia among CBCs, %)                                     |             |                      |                      |      |                      |      |                        |                  |     |
|---------------------------------------------------------------------------------------------|-------------|----------------------|----------------------|------|----------------------|------|------------------------|------------------|-----|
| 7 <sup>1</sup>                                                                              | Case series | serious <sup>2</sup> | serious <sup>3</sup> | none | serious <sup>4</sup> | none | 15%<br>95% CI 7%-23%   | ⊕○○○<br>VERY LOW | TBD |
| Detection of leukopenia (frequency of leukopenia among CBCs, %)                             |             |                      |                      |      |                      |      |                        |                  |     |
| 7 <sup>5</sup>                                                                              | Case series | serious <sup>2</sup> | serious <sup>3</sup> | none | serious <sup>4</sup> | none | 4%<br>95% CI 1-7%      | ⊕○○○<br>VERY LOW | TBD |
| Detection of lymphopenia (frequency of lymphopenia among CBCs, %)                           |             |                      |                      |      |                      |      |                        |                  |     |
| 2 <sup>4</sup>                                                                              | Case series | serious <sup>2</sup> | serious <sup>3</sup> | none | serious <sup>4</sup> | none | 42%<br>(95% CI 14-69%) | ⊕○○○<br>VERY LOW | TBD |
| Detection of bone marrow granulomas (frequency of granulomas among bone marrow biopsies, %) |             |                      |                      |      |                      |      |                        |                  |     |
| 2 <sup>6</sup>                                                                              | Case series | serious <sup>2</sup> | serious <sup>3</sup> | none | serious <sup>4</sup> | none | 38%<br>95% CI 13-64%   | ⊕○○○<br>VERY LOW | TBD |
| Treatment change (%)                                                                        |             |                      |                      |      |                      |      |                        |                  |     |
| -                                                                                           | -           | -                    | -                    | -    | -                    | -    | -                      | -                | -   |

**Footnotes:**

<sup>1</sup>Ferguson, Gupta, Lower, Mayock, McCort, Sharma, and Yanardag.

<sup>2</sup>Many were retrospective chart reviews; therefore, there was a risk of selection bias.

<sup>3</sup>When pooled by meta-analysis, the I<sup>2</sup> >50%. Also, the range is wide.

<sup>4</sup>A large proportion of the studies are small with <100 patients.

<sup>5</sup>Cummings, Ferguson, Gupta, Israel, Mayock, McCourt, and Sharma.

<sup>6</sup>Gupta and Lower.

<sup>7</sup>Yanardag and Lower.

**QUESTION #8: Should sarcoidosis patients who do not have cardiac symptoms or signs be routinely screened for cardiac sarcoidosis using ECG, TTE, or Holter?**

**Search strategy for ECG, TTE, and Holter combined**

| # | Searches                                                                                                                                                                                                                                        |
|---|-------------------------------------------------------------------------------------------------------------------------------------------------------------------------------------------------------------------------------------------------|
| 1 | exp Echocardiography/                                                                                                                                                                                                                           |
| 2 | (echocardiogra\$ or echo cardiogra\$ or ((heart or cardi\$) adj echogra\$)).mp.                                                                                                                                                                 |
| 3 | 1 or 2                                                                                                                                                                                                                                          |
| 4 | Electrocardiography/ or electrocardiograph/                                                                                                                                                                                                     |
| 5 | (electromyocardiograph\$ or electrocardiogra\$ or electro cardiograph\$ or polycardiograph\$ or ECG or EKG).mp.                                                                                                                                 |
| 6 | 4 or 5                                                                                                                                                                                                                                          |
| 7 | Electrocardiography, Ambulatory/ or ambulatory electrocardiography/                                                                                                                                                                             |
| 8 | Holter monitoring/ or Holter monitor/                                                                                                                                                                                                           |
| 9 | ((event or holter) adj2 (monitor\$ or record\$ or ecg or electrocardiogra\$)) or (electrocardiogra\$ adj (record\$ or monitor\$)) or (electrocardiogra\$ adj (record\$ or monitor\$)) or ((ambulatory or dynamic) adj2 electrocardiogra\$)).mp. |



|    |                                                               |
|----|---------------------------------------------------------------|
| 10 | 7 or 8 or 9                                                   |
| 11 | 3 or 6 or 10                                                  |
| 12 | exp sarcoidosis/                                              |
| 13 | sarcoidosis/                                                  |
| 14 | sarcoidosis/ or sarcoidosis, pulmonary/ or uveoparotid fever/ |
| 15 | sarcoid\$.mp.                                                 |
| 16 | (besnier adj boeck\$).tw.                                     |
| 17 | (boeck\$ adj (disease or sarcoid)).tw.                        |
| 18 | (schaumann\$ adj (disease or syndrome)).tw.                   |
| 19 | uveoparoti\$.tw.                                              |
| 20 | (benign\$ adj lymphogranuloma\$).tw.                          |
| 21 | ((junging or heerfordt or lofgren) adj syndrome).tw.          |
| 22 | neurosarcoidosis.tw.                                          |
| 23 | (lupus adj pernio).tw.                                        |
| 24 | (idiopathic adj3 inflammat\$ adj3 granulomat\$).tw.           |
| 25 | or/12-24 [all sarcoidosis]                                    |
| 26 | 11 and 25                                                     |
| 27 | limit 26 to English language                                  |

### Study selection criteria

|   |                                                                                                                                                                                                                                                                                                                                                                 |
|---|-----------------------------------------------------------------------------------------------------------------------------------------------------------------------------------------------------------------------------------------------------------------------------------------------------------------------------------------------------------------|
| 1 | Randomized trials that enrolled patients with extracardiac sarcoidosis and no cardiac symptoms, compared performing the diagnostic test to not performing the diagnostic test, and measured patient-important outcomes. If none found, then next step.                                                                                                          |
| 2 | Observational studies that enrolled patients with extracardiac sarcoidosis and no cardiac symptoms, compared performing the diagnostic test to not performing the diagnostic test, and measured patient-important outcomes. If none found, then next step.                                                                                                      |
| 3 | Accuracy studies that enrolled patients with extracardiac sarcoidosis and no cardiac symptoms, and either reported test characteristics (true positive, false positive, true negative, false negative) or reported data that enabled the calculation of test characteristics. If none found, then “no recommendation”, “research recommendation”, or next step. |
| 4 | Case series that enrolled patients with extracardiac sarcoidosis and no cardiac symptoms and reported the frequency of abnormal diagnostic tests and related outcomes.                                                                                                                                                                                          |

### Flow of information diagrams

Flow of information for ECG

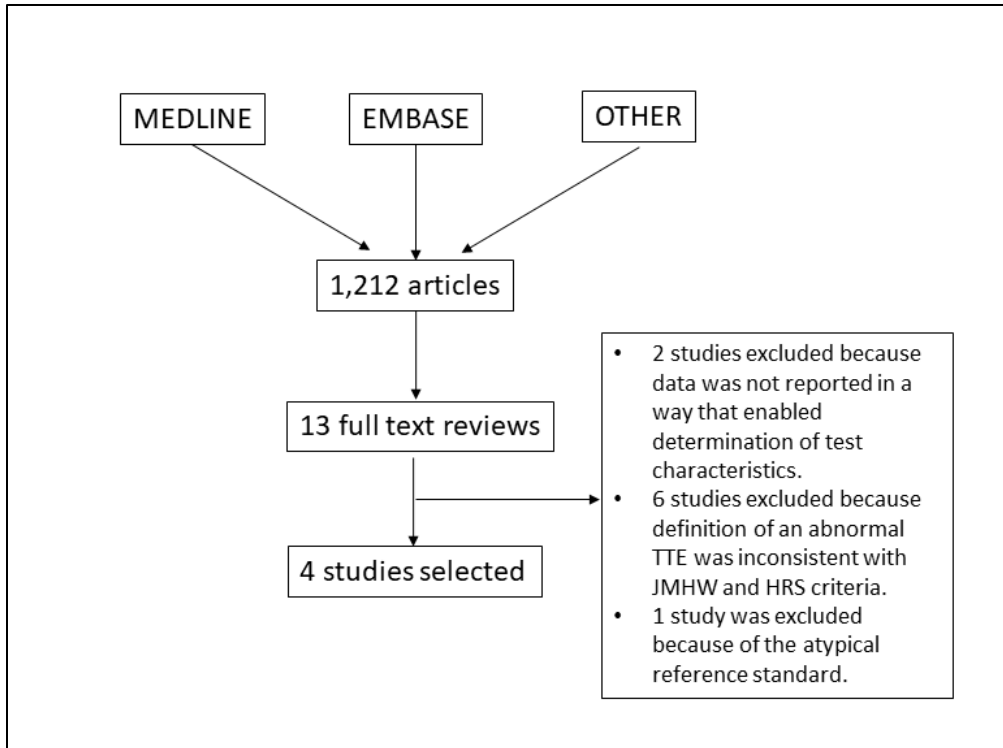

Flow of information for TTE

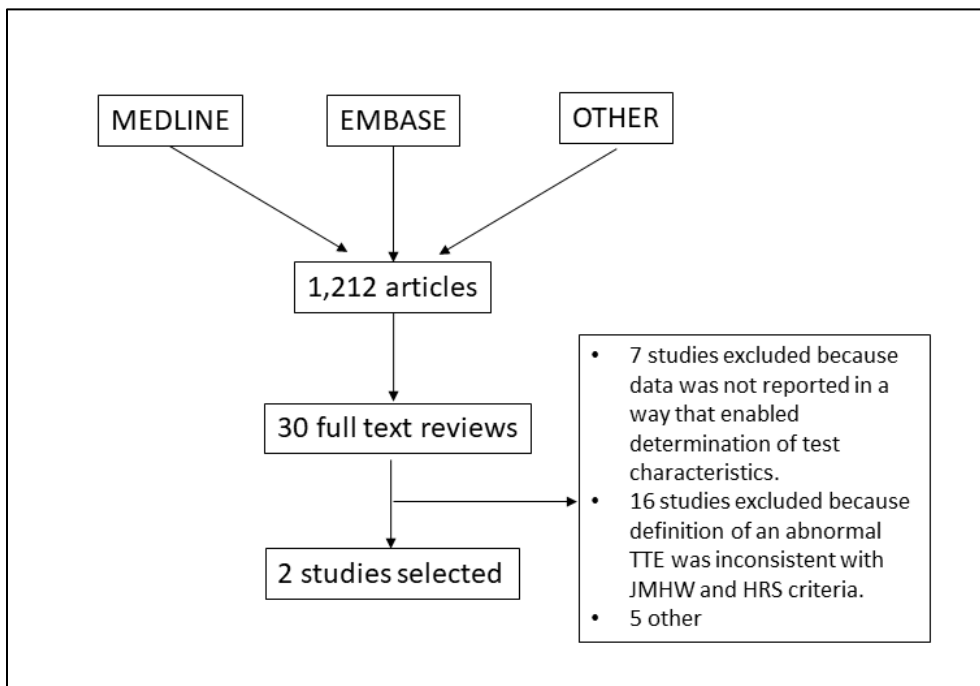

Flow of information for Holter

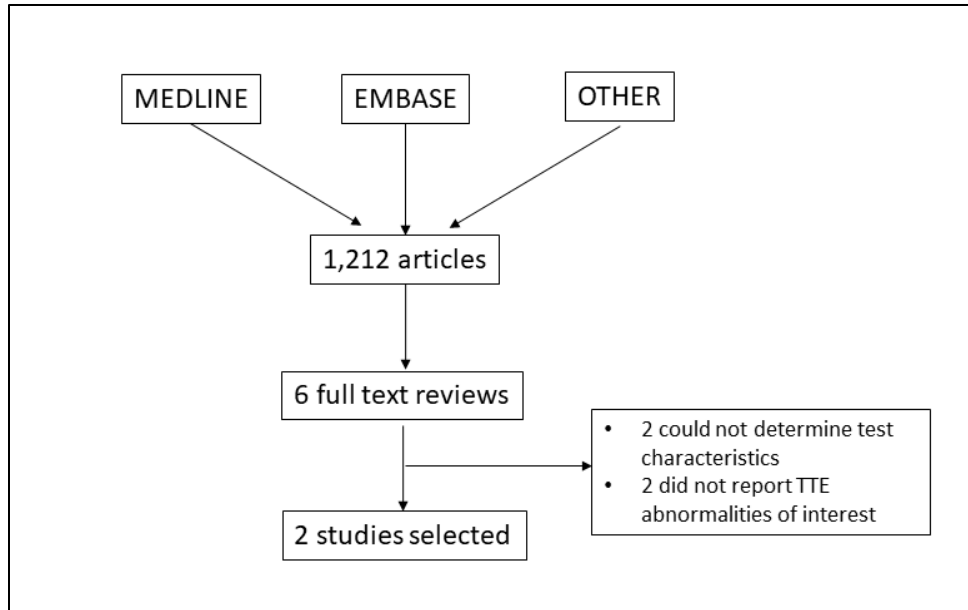

### Selected studies with outcomes

| Electrocardiograms (ECGs) |     |                                                                              |                                                                                                                                                                                                      |                                           |                                       |
|---------------------------|-----|------------------------------------------------------------------------------|------------------------------------------------------------------------------------------------------------------------------------------------------------------------------------------------------|-------------------------------------------|---------------------------------------|
| Study                     | N   | Patients                                                                     | Definition of abnormal ECG                                                                                                                                                                           | Frequency of abnormal ECG Sarcoidosis (%) | Frequency of abnormal ECG Healthy (%) |
| Mehta 2008                | 62  | Non-cardiac sarcoidosis. 21% sx, 79% asx                                     | RBBB, LBBB, Left Anterior Fascicular block, left posterior fascicular block, AV block                                                                                                                | 3/62 (5%)                                 | N/A                                   |
| Nagao 2015                | 227 | Non-cardiac sarcoidosis. Sx and asx not reported                             | Prolonged PR int, RBBB, LAFB, and LBBB (the study included others too, but we extracted data only for these abnormalities for consistency with JMHW and HRS criteria).                               | 23/227 (10%)                              | N/A                                   |
| Langer 1995               | 244 | Non-cardiac sarcoidosis. Sx and asx not reported                             | Incomplete RBBB, RBBB, AVB, ventricular extrasystole, ST depressions (the study included others too, but we extracted data only for these abnormalities for consistency with JMHW and HRS criteria). | 18/244 (7%)                               | N/A                                   |
| Suzuki 1994               | 99  | 38 w/ non-cardiac sarcoidosis, sx and asx not reported; 58 healthy controls. | Left axis deviation, RBBB, LBBB, AV block (the study included others too, but we extracted data only for these abnormalities for consistency with JMHW and HRS criteria).                            | 18/38 (47%)                               | 5/58 (9%)                             |
| <b>Summary estimates</b>  |     |                                                                              | <b>Weighted (% , 95% CI)</b>                                                                                                                                                                         | 7%*<br>(95% CI 4-11%)                     | N/A                                   |
|                           |     |                                                                              | <b>Unweighted (% , 95% CI)</b>                                                                                                                                                                       | 8%*<br>(95% CI 6-11%)                     | 9%<br>(95% CI 4-19%)                  |
|                           |     |                                                                              | <b>Median (Range)</b>                                                                                                                                                                                | 7%*<br>(5-10%)                            | N/A                                   |

\* Includes Langer, Mehta, and Nagao (patients presented to medical pulmonary clinic) but not Suzuki (patients presented to cardiology clinic) because results are heterogeneous and the former more closely reflect the patients of interest.

| Study      | Diagnosis of cardiac sarcoid |    |    |    |    |                    |                       | Cardiac events (AV block, VT, and systolic dysfunction) |          |                              | All-cause Mortality |          |                     |
|------------|------------------------------|----|----|----|----|--------------------|-----------------------|---------------------------------------------------------|----------|------------------------------|---------------------|----------|---------------------|
|            | Diagnosis standard           | TP | FP | TN | FN | Se                 | Sp                    | Abn ECG                                                 | Norm ECG | Abnormal vs. normal          | Abn ECG             | Norm ECG | Abnormal vs. normal |
| Mehta 2008 | +cMRI or +PET scan           | 2  | 1  | 38 | 21 | 9%<br>95% CI 1-27% | 97%<br>95% CI 86-100% | NR                                                      | NR       | NR                           | NR                  | NR       | NR                  |
| Nagao 2015 | N/A                          | NR | NR | NR | NR | N/A                | N/A                   | NR                                                      | NR       | HR 11.27 (95% CI 3.29-38.64) | NR                  | NR       | NR                  |

|                          |                                                                                                  |                                                                           |    |    |    |                         |                         |                                         |    |    |                                                       |              |                           |
|--------------------------|--------------------------------------------------------------------------------------------------|---------------------------------------------------------------------------|----|----|----|-------------------------|-------------------------|-----------------------------------------|----|----|-------------------------------------------------------|--------------|---------------------------|
| Langer 1995              | N/A                                                                                              | NR                                                                        | NR | NR | NR | N/A                     | N/A                     | NR                                      | NR | NR | 8/18* (44%)                                           | 21/59* (36%) | RR 1.4 (95% CI 0.80-2.42) |
| Suzuki 1994              | a) myocardial granulomas, b) +PET, c) +ECG, AND d) no alternative explanation for heart disease. | 11                                                                        | 7  | 19 | 1  | 92%<br>95% CI<br>65-99% | 73%<br>95% CI<br>54-86% | NR                                      | NR | NR | NR                                                    | NR           | NR                        |
| <b>Summary Estimates</b> |                                                                                                  | <b>Too different too pool, may reflect different diagnostic standards</b> |    |    |    |                         |                         | <b>HR 11.27<br/>(95% CI 3.29-38.64)</b> |    |    | <b>44% vs. 36%<br/>RR 1.40<br/>(95% CI 0.80-2.42)</b> |              |                           |

\* Determined over a median 27-years (range 0-36 years) of follow-up.

| Echocardiograms (TTEs)   |    |                                                  |                                                                                |                                   |                              |                          |
|--------------------------|----|--------------------------------------------------|--------------------------------------------------------------------------------|-----------------------------------|------------------------------|--------------------------|
| Study                    | N  | Patients                                         | Definition of abnormal TTE                                                     |                                   | Abnormal TTE sarcoidosis (%) | Abnormal TTE healthy (%) |
| Mehta 2008               | 62 | Non-cardiac sarcoidosis. 21% sx, 79% asx         | LV EF <45%, SWMA, diastolic dysfunction, or RV systolic dysfunction without PH |                                   | 5/62 (8%)                    | N/A                      |
| Burstow 1989             | 88 | Non-cardiac sarcoidosis. Sx and asx not reported | EF <50% and/or SWMA not attributable to CAD                                    |                                   | 12/88 (14%)                  | N/A                      |
| <b>Summary Estimates</b> |    | <b>Weighted (% , 95% CI)</b>                     |                                                                                | <b>11%</b><br><b>95% CI 5-17%</b> | <b>N/A</b>                   |                          |
|                          |    | <b>Unweighted (% , 95% CI)</b>                   |                                                                                | <b>11%</b><br><b>95% CI 7-17%</b> | <b>N/A</b>                   |                          |
|                          |    | <b>Median (Range)</b>                            |                                                                                | <b>11%</b><br><b>(8% - 14%)</b>   | <b>N/A</b>                   |                          |

| Study                    | Diagnosis of cardiac sarcoid                                                           |    |    |    |    |                      |                      | Conduction system abnormalities                                |             |                            |
|--------------------------|----------------------------------------------------------------------------------------|----|----|----|----|----------------------|----------------------|----------------------------------------------------------------|-------------|----------------------------|
|                          | Diagnosis standard                                                                     | TP | FP | TN | FN | Se                   | Sp                   | Abnormal TTE                                                   | Normal TTE  | Abnormal vs. normal        |
| Mehta 2008               | +cMRI or +PET                                                                          | 6  | 2  | 36 | 18 | 25%<br>95% CI 10-47% | 97%<br>95% CI 86-99% | NR                                                             | NR          | NR                         |
| Burstow 1989             | +cMRI                                                                                  | NR | NR | NR | NR | N/A                  | N/A                  | 7/12 (58%)                                                     | 17/76 (22%) | RR 2.6<br>95% CI 1.38-4.92 |
| <b>Summary Estimates</b> | <b>Sensitivity<br/>25%, 95% CI 10-47%</b><br><b>Specificity<br/>95%, 95% CI 83-99%</b> |    |    |    |    |                      |                      | <b>58% vs. 22%</b><br><b>RR 2.6</b><br><b>95% CI 1.38-4.92</b> |             |                            |

| Continuous ambulatory electrocardiography (Holter) |    |                                                     |                                     |                         |                       |                                                                                                  |    |    |    |    |                      |                       |
|----------------------------------------------------|----|-----------------------------------------------------|-------------------------------------|-------------------------|-----------------------|--------------------------------------------------------------------------------------------------|----|----|----|----|----------------------|-----------------------|
| Study                                              | N  | Patients                                            | Defn Abnl Holter                    | Abnl Holter sarcoid (%) | Abnl Holter Hlthy (%) | Diagnosis of cardiac sarcoid                                                                     |    |    |    |    |                      |                       |
|                                                    |    |                                                     |                                     |                         |                       | Diagnosis standard                                                                               | TP | FP | TN | FN | Se                   | Sp                    |
| Mehta 2008                                         | 62 | Non-cardiac sarcoidosis. 21% sx, 79% asx            | RBBB, LBBB, AV block, PVC, VT, SVTs | 3/62 (5%)               | N/A                   | +cMRI or +PET                                                                                    | 12 | 1  | 37 | 12 | 50%<br>95% CI 29-71% | 97%<br>95% CI 86-100% |
| Suzuki 1994                                        | 99 | 38 w/ non-cardiac sarcoidosis; 58 healthy controls. | PVCs                                | 15/38 (39%)             | 12/58 (21%)           | a) myocardial granulomas, b) +PET, c) +ECG, AND d) no alternative explanation for heart disease. | 8  | 2  | 24 | 4  | 67%<br>95% CI 39-86% | 92%<br>95% CI 76-98%  |

|                          |                                |                                             |             |                                                                                                    |
|--------------------------|--------------------------------|---------------------------------------------|-------------|----------------------------------------------------------------------------------------------------|
| <b>Summary Estimates</b> | <b>Weighted (% , 95% CI)</b>   | <b>N/A</b>                                  | <b>N/A</b>  | <b>Sensitivity</b><br><b>56%, 95% CI 40-70%</b><br><b>Specificity</b><br><b>95%, 95% CI 87-98%</b> |
|                          | <b>Unweighted (% , 95% CI)</b> | <b>5% *</b><br><b>95% CI</b><br><b>1-9%</b> | <b>N/A*</b> |                                                                                                    |
|                          | <b>Median (Range)</b>          | <b>N/A</b>                                  | <b>N/A</b>  |                                                                                                    |

\* Includes Mehta only (patients presented to medical pulmonary clinic) but not Suzuki (patients presented to cardiology clinic) because results are heterogeneous and the former more closely reflect the patients of interest.

### Side-by-side comparisons of diagnostic test characteristics

|                                                                                         | <b>ECG</b>                                                                                                                                                                          | <b>TTE</b>                                                                    | <b>Holter</b>                                                                   |
|-----------------------------------------------------------------------------------------|-------------------------------------------------------------------------------------------------------------------------------------------------------------------------------------|-------------------------------------------------------------------------------|---------------------------------------------------------------------------------|
| <b>Mehta study</b><br>(only selected study that compared modalities in same population) | Sensitivity= 9%, 95% CI 1-27%<br>Specificity= 97%, 95% CI 86-100%                                                                                                                   | Sensitivity= 25%, 95% CI 10-47%<br>Specificity= 95%, 95% CI 83-99%            | Sensitivity= 50%, 95% CI 29-71%<br>Specificity= 97%, 95% CI 86-100%             |
| <b>Evidence base</b>                                                                    | 2 studies that can't be pooled:<br><br>Sensitivity= 9%, 95% CI 1-27%<br>Specificity= 97%, 95% CI 86-100%<br><br>Sensitivity= 92%, 95% CI 62-100%<br>Specificity= 73%, 95% CI 52-88% | 1 study<br>Sensitivity= 25%, 95% CI 10-47%<br>Specificity= 97%, 95% CI 86-99% | 2 studies<br>Sensitivity= 56%, 95% CI 40-70%<br>Specificity= 95%, 95% CI 87-98% |

\*One additional study was encountered that evaluated all three modalities in the same population. The study was not selected for our systematic review because it defined an abnormal test based upon any abnormalities, not just those considered important by the JMHV and HRS. This will tend to overestimate the sensitivity and underestimate the specificity. It found the following: ECG- Se 39%, Sp 90%; TTE- Se 70%, Sp 58%; and, Holter- Se 39%, Sp 85%.

### Forest plots

#### ECG- prevalence of abnormal electrocardiography

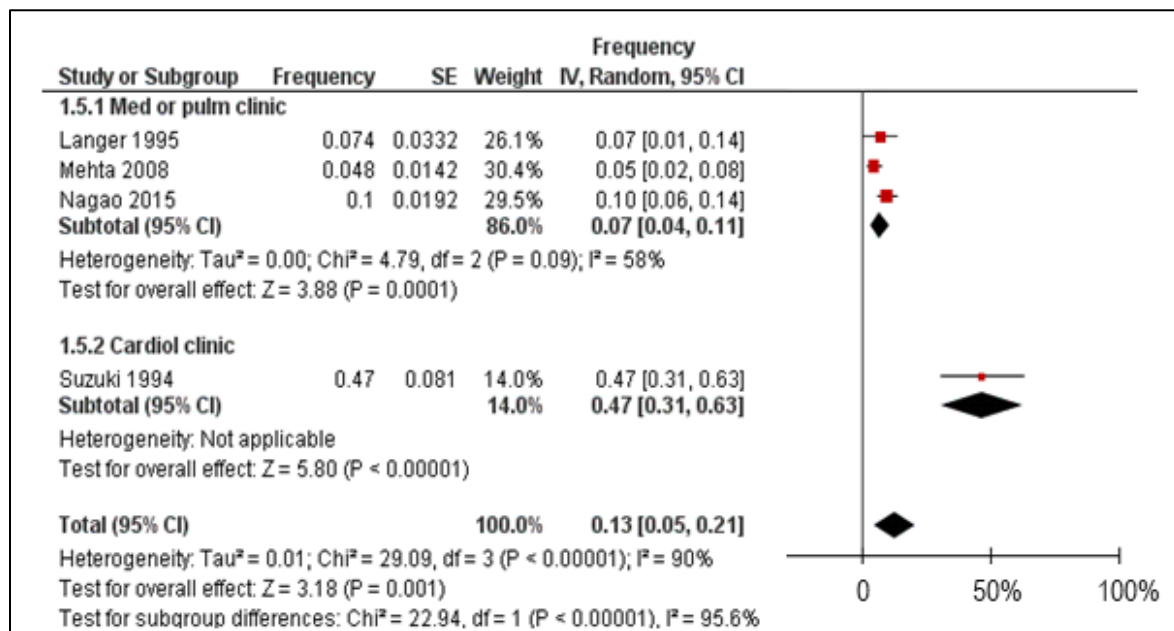

## ECG- diagnostic accuracy

| Study       | TP | FP | FN | TN | Sensitivity (95% CI) | Specificity (95% CI) | Sensitivity (95% CI) | Specificity (95% CI) |
|-------------|----|----|----|----|----------------------|----------------------|----------------------|----------------------|
| Mehta 2008  | 2  | 1  | 21 | 38 | 0.09 [0.01, 0.28]    | 0.97 [0.87, 1.00]    |                      |                      |
| Suzuki 1994 | 11 | 7  | 1  | 19 | 0.92 [0.62, 1.00]    | 0.73 [0.52, 0.88]    |                      |                      |

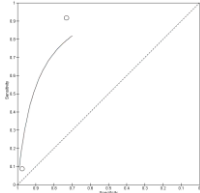

## TTE- prevalence of abnormal TTE

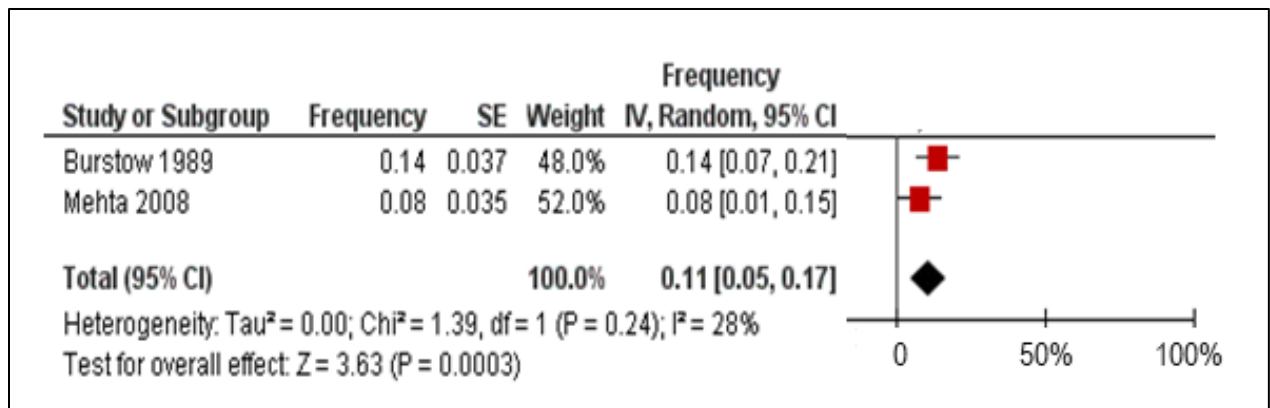

## Holter- prevalence of abnormal Holter

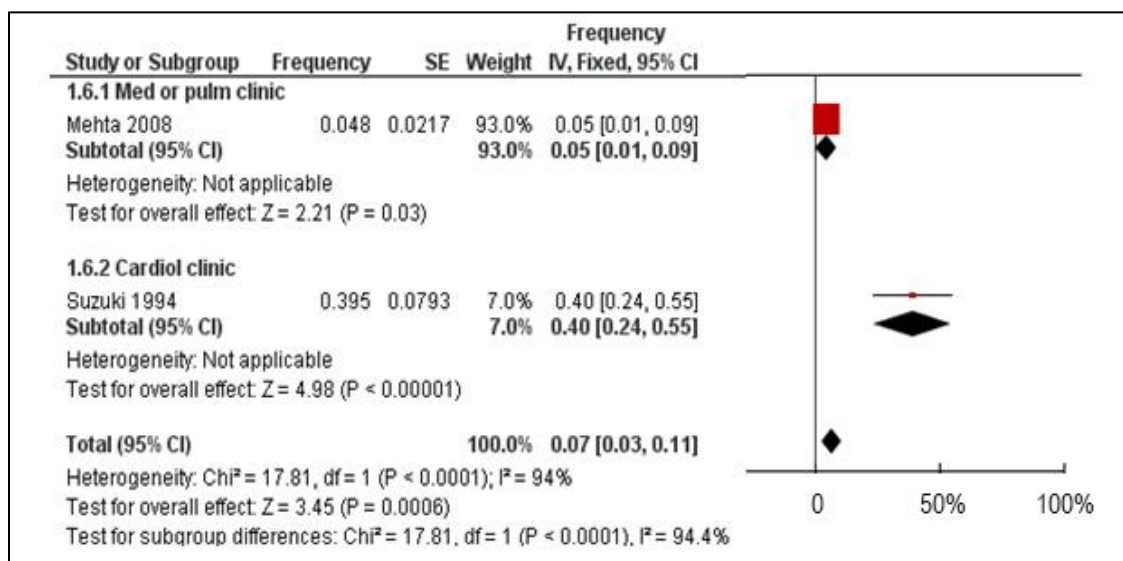

## Holter- diagnosis of cardiac sarcoid

| Study       | TP | FP | FN | TN | Sensitivity (95% CI) | Specificity (95% CI) | Sensitivity (95% CI)                                                               | Specificity (95% CI)                                                                |
|-------------|----|----|----|----|----------------------|----------------------|------------------------------------------------------------------------------------|-------------------------------------------------------------------------------------|
| Mehta 2008  | 12 | 1  | 12 | 37 | 0.50 [0.29, 0.71]    | 0.97 [0.86, 1.00]    |  |  |
| Suzuki 1994 | 8  | 2  | 4  | 24 | 0.67 [0.35, 0.90]    | 0.92 [0.75, 0.99]    |  |  |

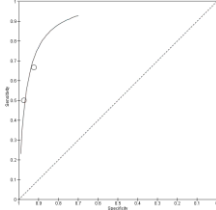

## Evidence profiles

### ECG-related profile

#### Bibliography:

- Nagao, et al. Electrocardiographic abnormalities and risk of developing cardiac events in extracardiac sarcoidosis. *Int J Cardiol* 2015; 189:1-5.
- Mehta, et al. Cardiac involvement in patients with sarcoidosis: diagnostic and prognostic value of outpatient testing. *Chest* 2008; 133(6):1426-1435.
- Langer, et al. Electrocardiographic changes in patients with intrathoracic sarcoidosis: influence on prognosis. *Sarcoidosis* 1995; 12(1):42-45.
- Suzuki, et al. Holter Monitoring as a Noninvasive Indicator of Cardiac Involvement in Sarcoidosis. *Chest* 1994; 106:1021-24

| Quality assessment                      |                     |                       |                      |                      |                      |       | Summary of findings                                                          |                |                                                                                |                                                          | Quality          | Importance |
|-----------------------------------------|---------------------|-----------------------|----------------------|----------------------|----------------------|-------|------------------------------------------------------------------------------|----------------|--------------------------------------------------------------------------------|----------------------------------------------------------|------------------|------------|
| No of studies                           | Design              | Risk of bias          | Inconsistency        | Indirectness         | Imprecision          | Other | Patients                                                                     |                | Effects                                                                        |                                                          |                  |            |
|                                         |                     |                       |                      |                      |                      |       | Abnl. ECG                                                                    | Nml. ECG       | Relative                                                                       | Absolute                                                 |                  |            |
| <b>Frequency of abnormal ECG</b>        |                     |                       |                      |                      |                      |       |                                                                              |                |                                                                                |                                                          |                  |            |
| 4 <sup>1</sup>                          | case series         | serious <sup>2</sup>  | serious <sup>3</sup> | serious <sup>4</sup> | none                 | none  | 7%<br>95% CI<br>4-11%                                                        | -              | -                                                                              | -                                                        | ⊕○○○<br>VERY LOW | TBD        |
| <b>Diagnosis of cardiac sarcoidosis</b> |                     |                       |                      |                      |                      |       |                                                                              |                |                                                                                |                                                          |                  |            |
| 2 <sup>5</sup>                          | accuracy study      | serious <sup>6</sup>  | serious <sup>7</sup> | serious <sup>4</sup> | serious <sup>8</sup> | none  | Study 1<br>Sensitivity= 9%, 95% CI 1-27%<br>Specificity= 97%, 95% CI 86-100% |                | Study 2<br>Sensitivity= 92%, 95% CI 62-100%<br>Specificity= 73%, 95% CI 52-88% |                                                          | ⊕○○○<br>VERY LOW | TBD        |
| <b>Mortality</b>                        |                     |                       |                      |                      |                      |       |                                                                              |                |                                                                                |                                                          |                  |            |
| 1 <sup>8</sup>                          | observational study | serious <sup>10</sup> | none                 | serious <sup>4</sup> | serious <sup>8</sup> | none  | 8/18<br>(44%)                                                                | 21/59<br>(36%) | RR 1.4<br>(95% CI<br>0.80-2.42)                                                | 89 more<br>per 1000<br>(from 148<br>less to 333<br>more) | ⊕○○○<br>VERY LOW | TBD        |
| <b>Cardiac events</b>                   |                     |                       |                      |                      |                      |       |                                                                              |                |                                                                                |                                                          |                  |            |
| 1 <sup>11</sup>                         | observational study | serious <sup>10</sup> | none                 | serious <sup>4</sup> | none                 | none  | -                                                                            | -              | HR 11.27<br>(95% CI<br>3.29-<br>38.64)                                         | N/A                                                      | ⊕○○○<br>VERY LOW | TBD        |

**Footnotes:**

- <sup>1</sup> All studies.
- <sup>2</sup> Two of four studies didn't enroll consecutive patients; therefore, there was a risk of selection bias. Can't exclude confounding bias.
- <sup>3</sup> Studies were heterogenous but resolved with subgroups. Reporting results of the more relevant subgroup (med and pulm clinic).
- <sup>4</sup> The question is about patients without cardiac symptoms, but the studies included patients with and without cardiac symptoms.
- <sup>5</sup> Mehta and Suzuki.
- <sup>6</sup> There is no universally accepted reference standard.
- <sup>7</sup> The studies are too different to pool; need to be reported separately
- <sup>8</sup> Low Optimal Information Size, OIS (studies with <200 patients).
- <sup>9</sup> Langer.
- <sup>10</sup> Study didn't enroll consecutive patients. Can't exclude confounding bias.
- <sup>11</sup> Nagao.

**Echocardiography profile**

**Bibliography:**

- 1. Mehta D, Lubitz SA, Frankel Z, Wisnivesky JP, Einstein AJ, Goldman M, Machac J, Teirstein A, 2008. Cardiac involvement in patients with sarcoidosis: diagnostic and prognostic value of outpatient testing. Chest 133: 1426-1435.
- 2. Burstow, et al. Two-dimensional echocardiographic findings in systemic sarcoidosis. Am J Cardiol 1989; 63(7):478-482.

| Quality assessment                                |                     |                      |                      |                      |                      |       | Summary of findings                                                |                |                               |                                                          | Quality          | Importance |
|---------------------------------------------------|---------------------|----------------------|----------------------|----------------------|----------------------|-------|--------------------------------------------------------------------|----------------|-------------------------------|----------------------------------------------------------|------------------|------------|
| No of studies                                     | Design              | Risk of bias         | Inconsistency        | Indirectness         | Imprecision          | Other | Patients                                                           |                | Effects                       |                                                          |                  |            |
|                                                   |                     |                      |                      |                      |                      |       | Abnl. TTE                                                          | Nml. TTE       | Relative                      | Absolute                                                 |                  |            |
| <b>Frequency of abnormal echocardiography (%)</b> |                     |                      |                      |                      |                      |       |                                                                    |                |                               |                                                          |                  |            |
| 2 <sup>1</sup>                                    | case series         | serious <sup>2</sup> | serious <sup>3</sup> | serious <sup>4</sup> | serious <sup>5</sup> | none  | 11%<br>95% CI<br>5-17%                                             | -              | -                             | -                                                        | ⊕○○○<br>VERY LOW | TBD        |
| <b>Diagnosis of cardiac sarcoidosis</b>           |                     |                      |                      |                      |                      |       |                                                                    |                |                               |                                                          |                  |            |
| 1 <sup>6</sup>                                    | accuracy study      | none                 | none                 | serious <sup>4</sup> | serious <sup>5</sup> | none  | Sensitivity= 25%, 95% CI 10-47%<br>Specificity= 95%, 95% CI 83-99% |                |                               |                                                          | ⊕○○○<br>VERY LOW | TBD        |
| <b>Development of conduction abnormalities</b>    |                     |                      |                      |                      |                      |       |                                                                    |                |                               |                                                          |                  |            |
| 1 <sup>7</sup>                                    | observational study | serious <sup>2</sup> | none                 | serious <sup>4</sup> | serious <sup>5</sup> | none  | 7/12<br>(58%)                                                      | 17/76<br>(22%) | RR 2.6<br>95% CI<br>1.38-4.92 | 360 more<br>per 1000<br>(from 76<br>more to<br>597 more) | ⊕○○○<br>VERY LOW | TBD        |

**Footnotes:**

- <sup>1</sup> All studies.
- <sup>2</sup> Can't exclude confounding bias.
- <sup>3</sup> High I<sup>2</sup> statistic.
- <sup>4</sup> The question is about patients without cardiac symptoms, but the studies included patients with and without cardiac symptoms.
- <sup>5</sup> Low optimum information size (<200 patients) and wide confidence intervals.
- <sup>6</sup> Mehta.
- <sup>7</sup> Burstow.

**Holter-related profile**

**Bibliography:**

- 1. Mehta, et al. Cardiac involvement in patients with sarcoidosis: diagnostic and prognostic value of outpatient testing. Chest 2008; 33(6):1426-1435.
- 2. Suzuki, et al. Holter Monitoring as a Noninvasive Indicator of Cardiac Involvement in Sarcoidosis. Chest 1994; 106:1021-24

| Quality assessment |               |              |             |       |          | Summary of findings |  | Quality | Importance |
|--------------------|---------------|--------------|-------------|-------|----------|---------------------|--|---------|------------|
| Design             | Inconsistency | Indirectness | Imprecision | Other | Patients | Effects             |  |         |            |



| No of studies                           |                | Risk of bias         |                      |                      |                      |      | Abnl. Holter                                                       | Nml. Holter | Relative         | Absolute |                  |     |
|-----------------------------------------|----------------|----------------------|----------------------|----------------------|----------------------|------|--------------------------------------------------------------------|-------------|------------------|----------|------------------|-----|
| <b>Frequency of abnormal Holter (%)</b> |                |                      |                      |                      |                      |      |                                                                    |             |                  |          |                  |     |
| 2                                       | case series    | serious <sup>1</sup> | serious <sup>2</sup> | serious <sup>3</sup> | serious <sup>4</sup> | none | 5%<br>95% CI<br>1-9%                                               | -           | -                | -        | ⊕○○○<br>VERY LOW | TBD |
| <b>Diagnosis of cardiac sarcoidosis</b> |                |                      |                      |                      |                      |      |                                                                    |             |                  |          |                  |     |
| 2                                       | accuracy study | serious <sup>5</sup> | none                 | serious <sup>3</sup> | serious <sup>4</sup> | none | Sensitivity= 56%, 95% CI 40-70%<br>Specificity= 95%, 95% CI 87-98% |             | ⊕○○○<br>VERY LOW | TBD      |                  |     |

**Footnotes:**

<sup>1</sup> Can't rule confounding bias.

<sup>2</sup> Studies were heterogenous, arguably too different to pool. Reporting results of only one study (med and pulm clinic).

<sup>3</sup> The question is about patients without cardiac symptoms, but the studies included patients with and without cardiac symptoms.

<sup>4</sup> Low optimum information size (<200 patients).

<sup>5</sup> There is no universally accepted reference standard.

**QUESTION #9: Should patients who are suspected of having cardiac sarcoidosis undergo cardiac MRI for diagnosis rather than TTE or PET?**

**Search strategy for MRI, PET, and TTE combined**

| #  | Searches                                                                          |
|----|-----------------------------------------------------------------------------------|
| 1  | exp sarcoidosis/                                                                  |
| 2  | sarcoidosis/                                                                      |
| 3  | sarcoidosis/ or sarcoidosis, pulmonary/ or uveoparotid fever/                     |
| 4  | sarcoid\$.mp.                                                                     |
| 5  | (besnier adj boeck\$).tw.                                                         |
| 6  | (boeck\$ adj (disease or sarcoid)).tw.                                            |
| 7  | (schaumann\$ adj (disease or syndrome)).tw.                                       |
| 8  | uveoparoti\$.tw.                                                                  |
| 9  | (benign\$ adj lymphogranuloma\$).tw.                                              |
| 10 | ((junging or heerfordt or lofgren) adj syndrome).tw.                              |
| 11 | neurosarcoidosis.tw.                                                              |
| 12 | (lupus adj pernio).tw.                                                            |
| 13 | (idiopathic adj3 inflammat\$ adj3 granulomat\$).tw.                               |
| 14 | or/1-13 [all sarcoidosis]                                                         |
| 15 | exp magnetic resonance imaging/                                                   |
| 16 | (MRI or MRIs or (magnetic adj2 resonance adj2 imag\$)).mp.                        |
| 17 | (echo adj2 spin adj2 imag\$).mp.                                                  |
| 18 | 15 or 16 or 17 [MRI]                                                              |
| 19 | exp Positron-Emission Tomography/                                                 |
| 20 | ((positron adj2 emission adj2 tomogra\$) or (PET adj2 (scan\$ or tomogra\$))).mp. |
| 21 | 19 or 20 [PET]                                                                    |
| 22 | exp Echocardiography/                                                             |

|    |                                                                 |
|----|-----------------------------------------------------------------|
|    | (echocardiogra\$ or echo cardiogra\$ or ((heart or cardi\$) adj |
| 23 | echogra\$)).mp.                                                 |
| 24 | 22 or 23 [TTE]                                                  |
|    | exp Cardiovascular System/ or exp Cardiovascular Diseases/ or   |
| 25 | Heart/                                                          |
| 26 | (cardi\$ or myocardi\$ or coronary or heart).mp.                |
| 27 | 25 or 26 [cardiac]                                              |
| 28 | 14 and 18                                                       |
| 29 | 14 and 18 [Sarcoidosis and MRI]                                 |
| 30 | 14 and 21 [Sarcoidosis and PET]                                 |
| 31 | 14 and 24 [Sarcoidosis and TTE]                                 |
| 32 | 29 or 30 or 31 [Sarcoidosis and MRI or PET or TTE]              |
| 33 | 27 and 32 [with cardiac]                                        |
| 34 | limit 33 to english language                                    |

### Study selection criteria

|   |                                                                                                                                                                                                                                                                                                                                                                                 |
|---|---------------------------------------------------------------------------------------------------------------------------------------------------------------------------------------------------------------------------------------------------------------------------------------------------------------------------------------------------------------------------------|
| 1 | Randomized trials that enrolled patients with known extracardiac sarcoidosis and suspected cardiac involvement, compared performing the diagnostic test to not performing the diagnostic test, and measured patient-important outcomes. If none found, then next step.                                                                                                          |
| 2 | Observational studies that enrolled patients with known extracardiac sarcoidosis and suspected cardiac involvement, compared performing the diagnostic test to not performing the diagnostic test, and measured patient-important outcomes. If none found, then next step.                                                                                                      |
| 3 | Accuracy studies that enrolled patients with known extracardiac sarcoidosis and suspected cardiac involvement, and either reported test characteristics (true positive, false positive, true negative, false negative) or reported data that enabled the calculation of test characteristics. If none found, then “no recommendation”, “research recommendation”, or next step. |
| 4 | Case series that enrolled patients with known extracardiac sarcoidosis and suspected cardiac involvement, and reported the frequency of abnormal diagnostic tests and related outcomes.                                                                                                                                                                                         |

### Flow of information diagrams

Flow of information for cMRI

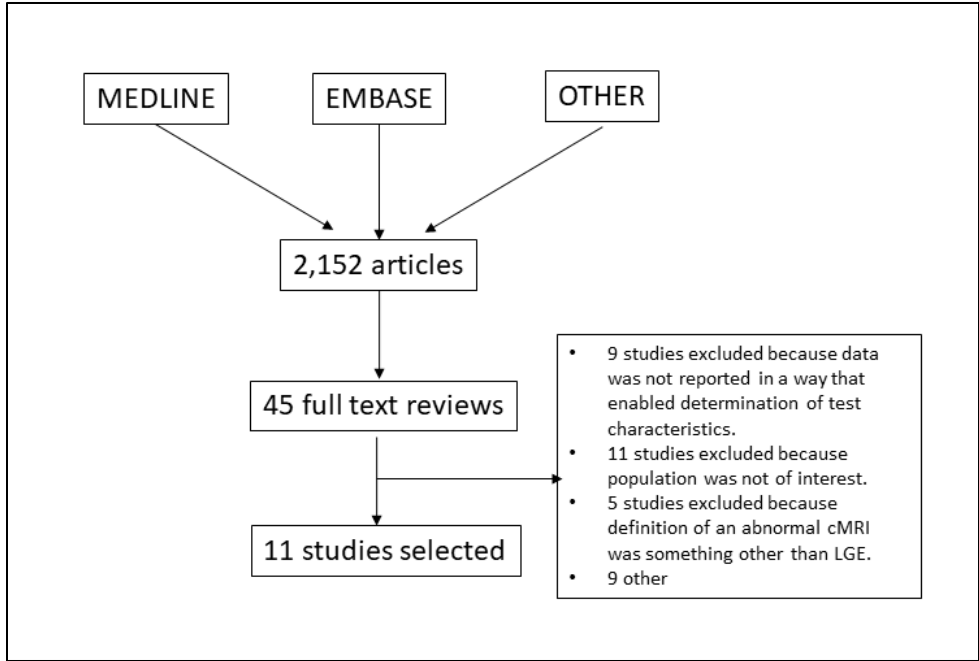

Flow of information for PET

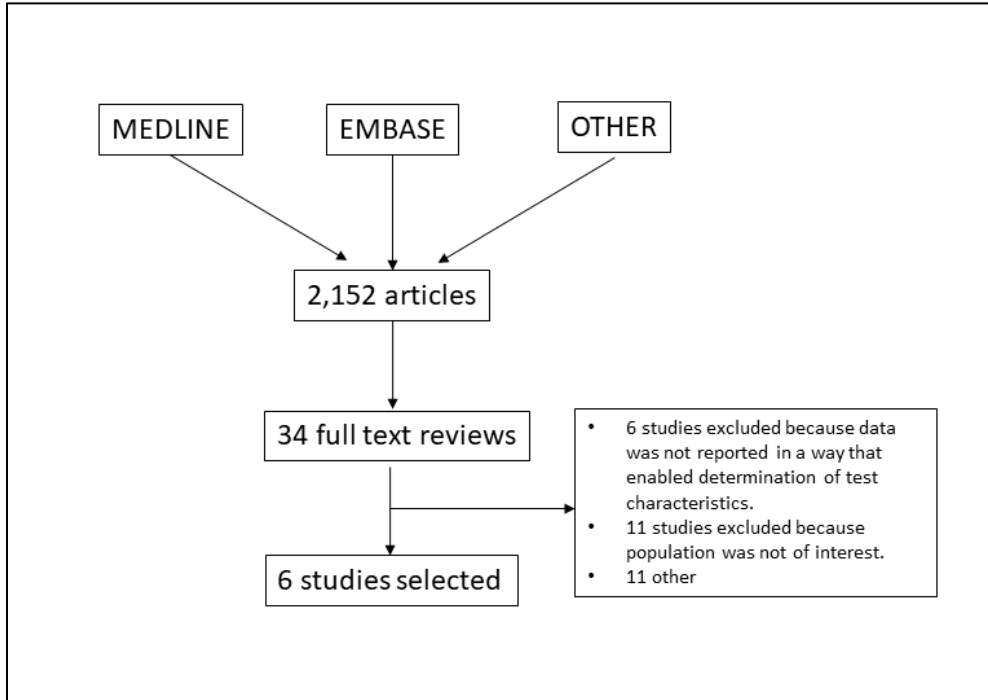

Flow of information for TTE

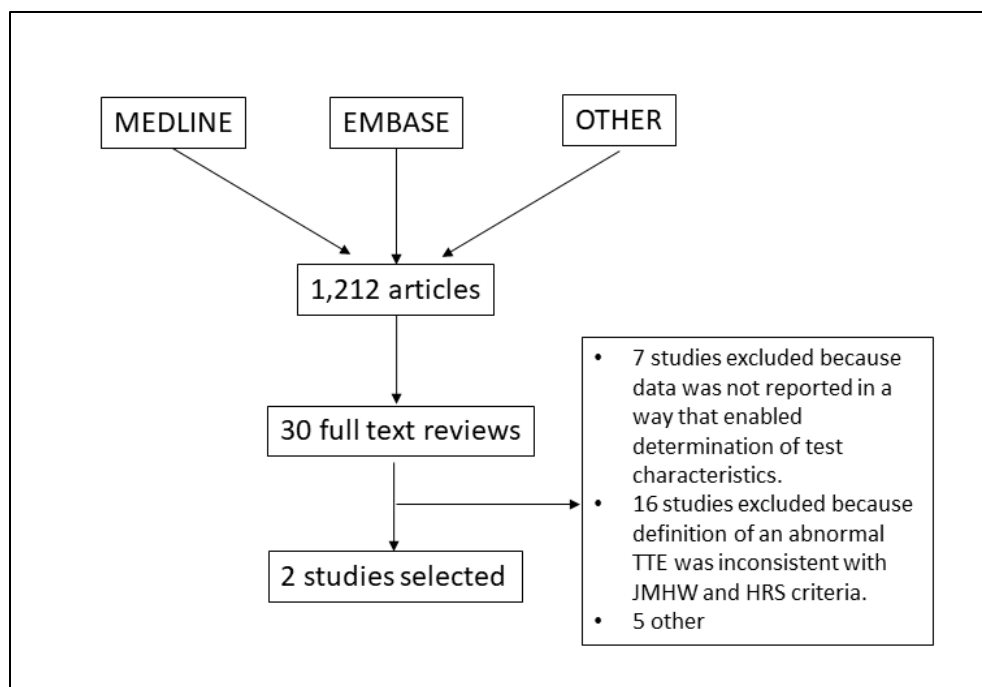

### Selected studies with outcomes

| Cardiac Magnetic Resonance Imaging (cMRI) |     |                                                                                                               |                             |                               |                           |
|-------------------------------------------|-----|---------------------------------------------------------------------------------------------------------------|-----------------------------|-------------------------------|---------------------------|
| Study                                     | N   | Patients                                                                                                      | Definition of abnormal      | Abnormal cMRI sarcoidosis (%) | Abnormal cMRI healthy (%) |
| Smedema 2005                              | 101 | Pulmonary sarcoidosis;<br>19 symptomatic<br>82 asymptomatic                                                   | Late gadolinium enhancement | 10/14<br>(71%)                | N/A                       |
| Ohira 2008                                | 21  | "Suspected cardiac sarcoidosis"<br>(i.e., abnormal ECG or TTE);<br>Did not specify sx versus asx              | Late gadolinium enhancement | 8/20<br>(40%)                 | N/A                       |
| Patel 2009                                | 81  | Non-cardiac sarcoidosis;<br>17 symptomatic<br>64 asymptomatic                                                 | Late gadolinium enhancement | 21/81<br>(26%)                | N/A                       |
| Patel 2011                                | 152 | Non-cardiac sarcoidosis;<br>Did not specify sx versus asx                                                     | Late gadolinium enhancement | 29/152<br>(19%)               | N/A                       |
| Greulich 2013                             | 155 | "Suspected cardiac sarcoidosis"<br>(abnormal sxs, ECG or TTE)                                                 | Late gadolinium enhancement | 39/153<br>(25%)               | N/A                       |
| Cain 2014                                 | 135 | Non-cardiac sarcoidosis;<br>Did not specify sx versus asx                                                     | Late gadolinium enhancement | 44/135<br>(33%)               | N/A                       |
| Kournas 2017                              | 321 | "Suspected cardiac sarcoidosis"<br>(i.e., abnormal sx, ECG, or TTE);<br>Mixture of sx versus asx              | Late gadolinium enhancement | 93/321<br>(29%)               | N/A                       |
| Stanton 2017                              | 46  | Pulmonary sarcoidosis;<br>At least 39% symptomatic                                                            | Late gadolinium enhancement | 10/46<br>(22%)                | N/A                       |
| Bravo 2017                                | 56  | "Suspected cardiac sarcoidosis";<br>Did not specify sx versus asx                                             | Late gadolinium enhancement | 31/56<br>(55%)                | N/A                       |
| Nadel 2015                                | 106 | Non-cardiac sarcoidosis (n=74),<br>non-cardiac and cardiac sarcoidosis (n=26), cardiac sarcoidosis only (n=6) | Late gadolinium enhancement | 32/106<br>(30%)               | N/A                       |

|                          |    |                                                                     |                             |                             |     |
|--------------------------|----|---------------------------------------------------------------------|-----------------------------|-----------------------------|-----|
| Wicks 2018               | 51 | "Suspected cardiac sarcoidosis" (n=44), known cardiac sarcoid (n=7) | Late gadolinium enhancement | 32/51 (63%)                 | N/A |
| <b>Summary estimates</b> |    |                                                                     | <b>Weighted</b>             | <b>27%, 95% CI 23-31% *</b> |     |
|                          |    |                                                                     | <b>Unweighted</b>           | <b>27%, 95% CI 25-30% *</b> |     |
|                          |    |                                                                     | <b>Median</b>               | <b>27%, range 19-40% *</b>  |     |

\*Bravo, Smedema, and Wick removed as outliers.

| Study                    | Diagnosis of cardiac sarcoid                                                                                                                 |    |    |     |    |                           |                           | Mortality                                                                   |                            |                                             |
|--------------------------|----------------------------------------------------------------------------------------------------------------------------------------------|----|----|-----|----|---------------------------|---------------------------|-----------------------------------------------------------------------------|----------------------------|---------------------------------------------|
|                          | Diagnosis standard for CS                                                                                                                    | TP | FP | TN  | FN | Se                        | Sp                        | Abnormal cMRI                                                               | Normal cMRI                | Abnormal vs. normal                         |
| Smedema 2005             | + modified JMHW criteria                                                                                                                     | 9  | 1  | 2   | 2  | 82%<br>95% CI<br>48-98%   | 67%<br>95% CI<br>9-99%    | NR                                                                          | NR                         | NR                                          |
| Ohira 2008               | + JMHW criteria                                                                                                                              | 5  | 3  | 10  | 2  | 71%<br>95% CI<br>29-96%   | 77%<br>95% CI<br>46-95%   | NR                                                                          | NR                         | NR                                          |
| Patel 2009               | + JMHW criteria                                                                                                                              | 8  | 13 | 58  | 2  | 80%<br>95% CI<br>44-97%   | 82%<br>95% CI<br>71-90%   | Cardiac<br>4/21<br>(19%)                                                    | Cardiac<br>1/60<br>(2%)    | Cardiac<br>RR 11.42<br>95% CI<br>1.35-96.57 |
| Patel 2011               | + JMHW criteria                                                                                                                              | 14 | 13 | 102 | 21 | 40%<br>95% CI<br>24-58%   | 89%<br>95% CI<br>81-94%   | NR                                                                          | NR                         | NR                                          |
| Greulich 2013            | NR                                                                                                                                           | NR | NR | NR  | NR | NR                        | NR                        | Overall<br>3/39<br>(7.7%)                                                   | Overall<br>1/114<br>(0.8%) | Overall<br>RR 8.76<br>95% CI<br>0.94-81.86  |
| Cain 2014                | NR                                                                                                                                           | NR | NR | NR  | NR | NR                        | NR                        | NR                                                                          | NR                         | NR                                          |
| Kournas 2017             | + HRS criteria                                                                                                                               | 93 | 0  | 225 | 3  | 97%<br>95% CI<br>91-99%   | 100%<br>95% CI<br>98-100% | NR                                                                          | NR                         | NR                                          |
| Stanton 2017             | + JMHW criteria                                                                                                                              | 2  | 8  | 36  | 0  | 100%<br>95% CI<br>16-100% | 82%<br>95% CI<br>67-92%   | NR                                                                          | NR                         | NR                                          |
| Bravo 2017               | + HRS criteria                                                                                                                               | 14 | 22 | 16  | 2  | 90%<br>95% CI<br>68-99%   | 100%<br>95% CI<br>98-100% | NR                                                                          | NR                         | NR                                          |
|                          | + JMHW criteria                                                                                                                              | 18 | 18 | 16  | 2  | 88%<br>95% CI<br>62-98%   | 42%<br>95% CI<br>26-59%   |                                                                             |                            |                                             |
| Nadel 2015               | NR                                                                                                                                           | NR | NR | NR  | NR | NR                        | NR                        | Overall<br>4/32<br>(12%)                                                    | Overall<br>8/74<br>(10%)   | Overall<br>RR 1.19<br>95% CI<br>0.38-3.66   |
|                          |                                                                                                                                              |    |    |     |    |                           |                           | Cardiac<br>3/32<br>(9%)                                                     | Cardiac<br>1/74<br>(1.4%)  | Cardiac<br>RR 7.13<br>95% CI<br>0.77-65.94  |
| Wicks 2018               | + JMHW criteria                                                                                                                              | 26 | 6  | 13  | 7  | 79%<br>95% CI<br>61-91%   | 68%<br>95% CI<br>43-87%   | NR                                                                          | NR                         | NR                                          |
| <b>Summary Estimates</b> | <b>JMHW *</b><br>Sensitivity- 82% (95 CI 72-89%)<br>Specificity- 73% (95% CI 67-79%)<br>PPV- 58% (95% CI 49-67%)<br>NPV- 90% (95% CI 84-94%) |    |    |     |    |                           |                           | <b>Overall mortality</b><br>9.9% versus 4.8%<br>RR 2.51, 95% CI 0.36-17.47  |                            |                                             |
|                          | <b>HRS</b><br>Sensitivity- 96% (95 CI 90-98%)<br>Specificity- 93% (95% CI 89-96%)                                                            |    |    |     |    |                           |                           | <b>Cardiac mortality</b><br>13.2% versus 1.5%<br>RR 9.00, 95% CI 1.93-41.97 |                            |                                             |

|  |                                                                    |  |
|--|--------------------------------------------------------------------|--|
|  | <b>PPV- 47% (95% CI 40-53%)</b><br><b>NPV- 98% (95% CI 95-99%)</b> |  |
|--|--------------------------------------------------------------------|--|

\*Removed Patel 2011 as an outlier.

| Study                    | Ventricular arrhythmias (VT and/or NSVT)                                                       |             |                              | Other outcomes                                                                                                                                                                                                                                                                           |               |              |                               |
|--------------------------|------------------------------------------------------------------------------------------------|-------------|------------------------------|------------------------------------------------------------------------------------------------------------------------------------------------------------------------------------------------------------------------------------------------------------------------------------------|---------------|--------------|-------------------------------|
|                          | Abnormal cMRI                                                                                  | Normal cMRI | Abnormal vs. normal          | Outcome                                                                                                                                                                                                                                                                                  | Abnormal cMRI | Normal cMRI  | Abnormal vs. normal           |
| Smedema 2005             | NR                                                                                             | NR          | NR                           | N/A                                                                                                                                                                                                                                                                                      | NR            | NR           | NR                            |
| Ohira 2008               | NR                                                                                             | NR          | NR                           | N/A                                                                                                                                                                                                                                                                                      | NR            | NR           | NR                            |
| Patel 2009               | NR                                                                                             | NR          | NR                           | N/A                                                                                                                                                                                                                                                                                      | NR            | NR           | NR                            |
| Patel 2011               | 5/15 (33%)                                                                                     | 4/67 (6%)   | RR 5.58<br>95% CI 1.70-18.34 | Diastolic heart failure                                                                                                                                                                                                                                                                  | 18/27 (67%)   | 41/123 (33%) | RR 2.0<br>95% CI 1.39-2.88    |
| Greulich 2013            | 20/39 (51%)                                                                                    | 0/114 (0%)  | Not estimable                | Aborted sudden cardiac death                                                                                                                                                                                                                                                             | 11/39 (28%)   | 0/114 (0%)   | Not estimable                 |
| Cain 2014                | 12/44 (27%)                                                                                    | 3/91 (3.3%) | RR 8.27<br>95% CI 2.46-27.82 | Atrial arrhythmias                                                                                                                                                                                                                                                                       | 16/44 (36%)   | 11/91 (12%)  | RR 3.01<br>95% CI 1.53-5.93   |
| Kournas 2017             | NR                                                                                             | NR          | NR                           | NR                                                                                                                                                                                                                                                                                       | NR            | NR           | NR                            |
| Stanton 2017             | NR                                                                                             | NR          | NR                           | Any arrhythmia (incl. heart block)                                                                                                                                                                                                                                                       | 6/10 (60%)    | 5/36 (14%)   | RR 4.32<br>95% CI 1.66-11.26  |
| Bravo 2017               | NR                                                                                             | NR          | NR                           | Major adverse cardiac event (VT, VF, AICD shock, all-cause death)                                                                                                                                                                                                                        | 15/36 (42%)   | 1/20 (5%)    | RR 8.33<br>95% CI 1.18-58.51  |
| Nadel 2015               | NR                                                                                             | NR          | NR                           | Complete heart block                                                                                                                                                                                                                                                                     | 4/32 (12%)    | 1/76 (1.4%)  | RR 9.5<br>95% CI 1.10-81.76   |
|                          |                                                                                                |             |                              | Heart failure                                                                                                                                                                                                                                                                            | 15/32 (47%)   | 3/76 (4%)    | RR 11.88<br>95% CI 3.69-38.21 |
|                          |                                                                                                |             |                              | Major adverse cardiac event (VT, VF, cardiac death)                                                                                                                                                                                                                                      | NR            | NR           | RR 12.5<br>95% CI 1.35-116.18 |
|                          |                                                                                                |             |                              | Pulmonary hypertension                                                                                                                                                                                                                                                                   | 8/32 (25%)    | 6/76 (8%)    | RR 3.17<br>95% CI 11.19-8.39  |
| Wicks 2018               | NR                                                                                             | NR          | NR                           | Major adverse cardiac event (PPM, VT, cardiac hospitalization, aborted sudden cardiac death, sudden cardiac death)                                                                                                                                                                       | NR            | NR           | HR 10.63<br>95% CI 1.4-80.78  |
| <b>Summary Estimates</b> | <b>Ventricular arrhythmias</b><br><b>38% versus 3.6%</b><br><b>RR 11.71, 95% CI 2.59-52.92</b> |             |                              | <b>Aborted sudden cardiac death</b><br><b>28% versus 0%</b><br><b>RR not estimable</b><br><br><b>Diastolic heart failure</b><br><b>67% versus 33%</b><br><b>RR 2.0, 95% CI 1.39-2.88</b><br><br><b>Other heart failure</b><br><b>47% versus 4%</b><br><b>RR 11.88, 95% CI 3.69-38.21</b> |               |              |                               |

|  |  |                                                                                                                                                                                                                                                                                                                                                                                                                                                                                                                                                                                                                                   |
|--|--|-----------------------------------------------------------------------------------------------------------------------------------------------------------------------------------------------------------------------------------------------------------------------------------------------------------------------------------------------------------------------------------------------------------------------------------------------------------------------------------------------------------------------------------------------------------------------------------------------------------------------------------|
|  |  | <p><b>Atrial arrhythmias</b><br/>36% versus 12%<br/>RR 3.01, 95% CI 1.53-5.93</p> <p><b>Complete heart block</b><br/>12% versus 1.4%<br/>RR 9.5, 95% CI 1.10-81.72</p> <p><b>Any arrhythmia including heart block</b><br/>60% versus 14%<br/>RR 4.32, 95% CI 1.66-11.26</p> <p><b>Pulmonary hypertension</b><br/>25% versus 8%<br/>RR 3.17, 95% CI 1.19-8.39</p> <p><b>Major adverse cardiac events</b><br/>Unable to pool due to variation of reporting</p> <ol style="list-style-type: none"> <li>42% versus 5%, RR 8.33, 95% CI 1.18-58.51</li> <li>RR 12.5, 95% CI 1.35-116.18</li> <li>HR 10.63, 95% CI 1.4-80.78</li> </ol> |
|--|--|-----------------------------------------------------------------------------------------------------------------------------------------------------------------------------------------------------------------------------------------------------------------------------------------------------------------------------------------------------------------------------------------------------------------------------------------------------------------------------------------------------------------------------------------------------------------------------------------------------------------------------------|

| Positron Emission Tomography (PET) |     |                                                                                                                            |                                                |                              |                          |
|------------------------------------|-----|----------------------------------------------------------------------------------------------------------------------------|------------------------------------------------|------------------------------|--------------------------|
| Study                              | N   | Patients                                                                                                                   | Definition of abnormal                         | Abnormal PET sarcoidosis (%) | Abnormal PET healthy (%) |
| Ohira 2008                         | 21  | "Suspected cardiac sarcoidosis" (abnormal ECG or TTE); Did not specify sx versus asx                                       | Focal uptake alone or focal on diffuse uptake  | 15/21 (71%)                  | N/A                      |
| Yokoyama 2015                      | 92  | "Suspected cardiac sarcoidosis" (abnormal ECG or TTE); Did not specify sx versus asx                                       | Focal uptake alone or focal on diffuse uptake  | 47/92 (51%)                  | N/A                      |
| Bravo 2017                         | 56  | "High clinical suspicious of cardiac sarcoidosis" 66% had known extra-cardiac sarcoidosis                                  | Focal uptake alone                             | 20/56 (36%)                  | N/A                      |
| Sperry 2018                        | 203 | "Suspected cardiac sarcoidosis" (VT, HB, HF, or other sx); 35% hx of immunosuppression                                     | Focal uptake ± myocardial perfusion            | 109/203 (53%)                | N/A                      |
| Sgard 2018                         | 80  | "Suspected cardiac sarcoidosis" (abnormal ECG, Holter, or TTE); Did not specify sx versus asx; 58% hx of immunosuppression | Focal or multifocal uptake                     | 11/80 (14%)                  | N/A                      |
| Wicks 2018                         | 51  | All patients had extra-cardiac sarcoidosis; 14% had known cardiac involvement and 86% had suspected cardiac involvement    | Focal uptake alone, or focal on diffuse uptake | 28/51 (54%)                  | N/A                      |
| <b>Summary estimates</b>           |     |                                                                                                                            | <b>Weighted</b>                                | <b>52%, 95% CI 43-60% *</b>  |                          |
|                                    |     |                                                                                                                            | <b>Unweighted</b>                              | <b>54%, 95% CI 50-59% *</b>  |                          |
|                                    |     |                                                                                                                            | <b>Median</b>                                  | <b>53%, range 36-71% *</b>   |                          |

\*Eliminated Sgard as an outlier.

| Study         | Diagnosis of cardiac sarcoid  |    |    |    |    |                           |                         | Other outcomes |              |            |                     |
|---------------|-------------------------------|----|----|----|----|---------------------------|-------------------------|----------------|--------------|------------|---------------------|
|               | Definition of cardiac sarcoid | TP | FP | TN | FN | Se                        | Sp                      | Outcome        | Abnormal PET | Normal PET | Abnormal vs. normal |
| Ohira 2008    | +JMHW criteria                | 7  | 8  | 5  | 1  | 88%<br>95% CI<br>47-100%  | 38%<br>95% CI<br>14-68% | NR             | NR           | NR         | NR                  |
| Yokoyama 2015 | +JMHW criteria                | 37 | 10 | 45 | 0  | 100%<br>95% CI<br>91-100% | 82%<br>95% CI<br>69-91% | NR             | NR           | NR         | NR                  |

|                          |                                                                                                                                                                          |    |    |    |    |                         |                           |                                                                                                                                                                                                                                                                                   |              |              |                              |
|--------------------------|--------------------------------------------------------------------------------------------------------------------------------------------------------------------------|----|----|----|----|-------------------------|---------------------------|-----------------------------------------------------------------------------------------------------------------------------------------------------------------------------------------------------------------------------------------------------------------------------------|--------------|--------------|------------------------------|
| Bravo 2017               | N/A                                                                                                                                                                      | NR | NR | NR | NR | NR                      | NR                        | Major adverse cardiac event (sVT, VF, AICD shock, all-cause death)                                                                                                                                                                                                                | NR           | NR           | HR 3.3<br>95% CI, 1.1-10.0   |
| Sperry 2018              | N/A                                                                                                                                                                      | NR | NR | NR | NR | NR                      | NR                        | Overall mortality                                                                                                                                                                                                                                                                 | NR           | NR           | HR 1.33<br>95% CI, 0.68-2.62 |
|                          |                                                                                                                                                                          |    |    |    |    |                         |                           | Major adverse cardiac events (VT or VF req defib, heart transplant, or all-cause death)                                                                                                                                                                                           | NR           | NR           | RR 2.0<br>95% CI, 1.26-3.17  |
| Sgard 2018               | +JMHW criteria                                                                                                                                                           | 6  | 5  | 53 | 16 | 27%<br>95% CI<br>11-50% | 91%<br>95% CI<br>81-97%   | Major adverse cardiac event (sVT, VF, AICD shock, all-cause death)                                                                                                                                                                                                                | 0/11<br>(0%) | 4/69<br>(6%) | Not estimable                |
|                          | +HRS criteria                                                                                                                                                            | 11 | 0  | 42 | 27 | 29%<br>95% CI<br>15-46% | 100%<br>95% CI<br>92-100% |                                                                                                                                                                                                                                                                                   |              |              |                              |
| Wicks 2018               | +JMHW criteria                                                                                                                                                           | 20 | 8  | 10 | 13 | 61%<br>95% CI<br>42-77% | 43%<br>95% CI<br>18-71%   | Major adverse cardiac event (sudden cardiac death, aborted sudden cardiac death, symptomatic VT, symptomatic bradycardia req. PPM, or cardiac hospitalization)                                                                                                                    | NR           | NR           | HR 2.29<br>95% CI, 0.72-7.33 |
| <b>Summary estimates</b> | <b>JMHW *</b><br><b>Sensitivity- 70% (95 CI 60-78%)</b><br><b>Specificity- 78% (95% CI 71-84%)</b><br><b>PPV- 69% (95% CI 60-77%)</b><br><b>NPV- 79% (95% CI 72-85%)</b> |    |    |    |    |                         |                           | <b>Overall mortality</b><br><b>HR 1.33, 95% CI 0.68-2.62</b><br><br><b>Major adverse cardiac events *</b><br><b>Unable to pool due to variation of reporting</b><br><b>1. HR 3.30, 95% CI 1.1-10</b><br><b>2. HR 2.29, 95% CI 0.72-7.33</b><br><b>3. RR 2.0, 95% CI 1.26-3.17</b> |              |              |                              |

\*Eliminated Sgard as outlier.

| Echocardiograms (TTEs)   |    |                                                  |                                                                                |  |                                   |                          |
|--------------------------|----|--------------------------------------------------|--------------------------------------------------------------------------------|--|-----------------------------------|--------------------------|
| Study                    | N  | Patients                                         | Definition of abnormal TTE                                                     |  | Abnormal TTE sarcoidosis (%)      | Abnormal TTE healthy (%) |
| Mehta 2008               | 62 | Non-cardiac sarcoidosis. 21% sx, 79% asx         | LV EF <45%, SWMA, diastolic dysfunction, or RV systolic dysfunction without PH |  | 5/62 (8%)                         | N/A                      |
| Burstow 1989             | 88 | Non-cardiac sarcoidosis. Sx and asx not reported | EF <50% and/or SWMA not attributable to CAD                                    |  | 12/88 (14%)                       | N/A                      |
| <b>Summary Estimates</b> |    |                                                  | <b>Weighted (% , 95% CI)</b>                                                   |  | <b>11%</b><br><b>95% CI 5-17%</b> | <b>N/A</b>               |
|                          |    |                                                  | <b>Unweighted (% , 95% CI)</b>                                                 |  | <b>11%</b><br><b>95% CI 7-17%</b> | <b>N/A</b>               |
|                          |    |                                                  | <b>Median (Range)</b>                                                          |  | <b>11%</b><br><b>(8% - 14%)</b>   | <b>N/A</b>               |

| Study | Diagnosis of cardiac sarcoid |    |    |    |    |    |    | Conduction system abnormalities |            |                     |
|-------|------------------------------|----|----|----|----|----|----|---------------------------------|------------|---------------------|
|       | Diagnosis standard           | TP | FP | TN | FN | Se | Sp | Abnormal TTE                    | Normal TTE | Abnormal vs. normal |
|       |                              |    |    |    |    |    |    |                                 |            |                     |



|                          |                                                                                                                                                       |    |    |    |    |                      |                      |                                                                |                |                               |
|--------------------------|-------------------------------------------------------------------------------------------------------------------------------------------------------|----|----|----|----|----------------------|----------------------|----------------------------------------------------------------|----------------|-------------------------------|
| Mehta 2008               | +cMRI or +PET                                                                                                                                         | 6  | 2  | 36 | 18 | 25%<br>95% CI 10-47% | 97%<br>95% CI 86-99% | NR                                                             | NR             | NR                            |
| Burstow 1989             | +cMRI                                                                                                                                                 | NR | NR | NR | NR | N/A                  | N/A                  | 7/12<br>(58%)                                                  | 17/76<br>(22%) | RR 2.6<br>95% CI<br>1.38-4.92 |
| <b>Summary Estimates</b> | <b>Sensitivity- 25%, 95% CI 10-47%</b><br><b>Specificity- 97%, 95% CI 86-99%</b><br><b>PPV – 75%, 95% CI 41-93%</b><br><b>NPV- 67%, 95% CI 53-78%</b> |    |    |    |    |                      |                      | <b>58% vs. 22%</b><br><b>RR 2.6</b><br><b>95% CI 1.38-4.92</b> |                |                               |

## Comparison

|                                         | <b>PET</b>                                                                                                                          | <b>cMRI</b>                                                                                                                         | <b>TTE</b>                                                                                                                       |
|-----------------------------------------|-------------------------------------------------------------------------------------------------------------------------------------|-------------------------------------------------------------------------------------------------------------------------------------|----------------------------------------------------------------------------------------------------------------------------------|
| <b>Reference standard</b>               | JMHW criteria                                                                                                                       | JMHW criteria                                                                                                                       | +MRI or +PET                                                                                                                     |
| <b>Diagnosis of cardiac sarcoidosis</b> | Sensitivity<br>70% (95 CI 60-78%)<br>Specificity<br>78% (95% CI 71-84%)<br>PPV<br>69% (95% CI 60-77%)<br>NPV<br>79% (95% CI 72-85%) | Sensitivity<br>82% (95 CI 72-89%)<br>Specificity<br>73% (95% CI 67-79%)<br>PPV<br>58% (95% CI 49-67%)<br>NPV<br>90% (95% CI 84-94%) | Sensitivity<br>25%, 95% CI 10-47%<br>Specificity<br>97%, 95% CI 86-99%<br>PPV<br>75%, 95% CI 41-93%<br>NPV<br>67%, 95% CI 53-78% |

## Forest plots

cMRI- prevalence of abnormal cMRI (outliers included)

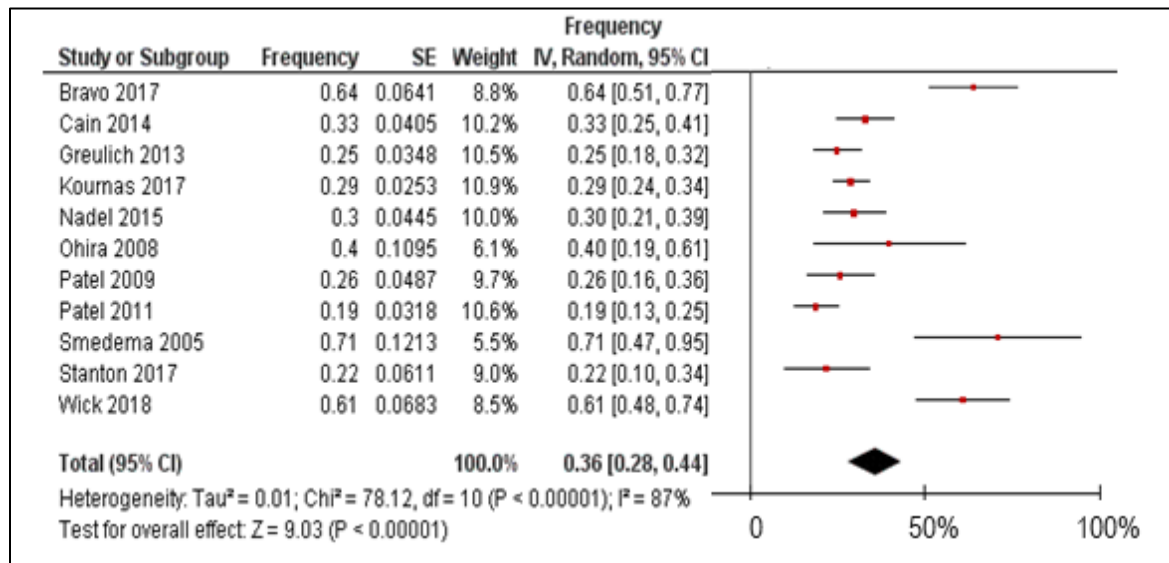

cMRI- prevalence of abnormal cMRI (outliers excluded)

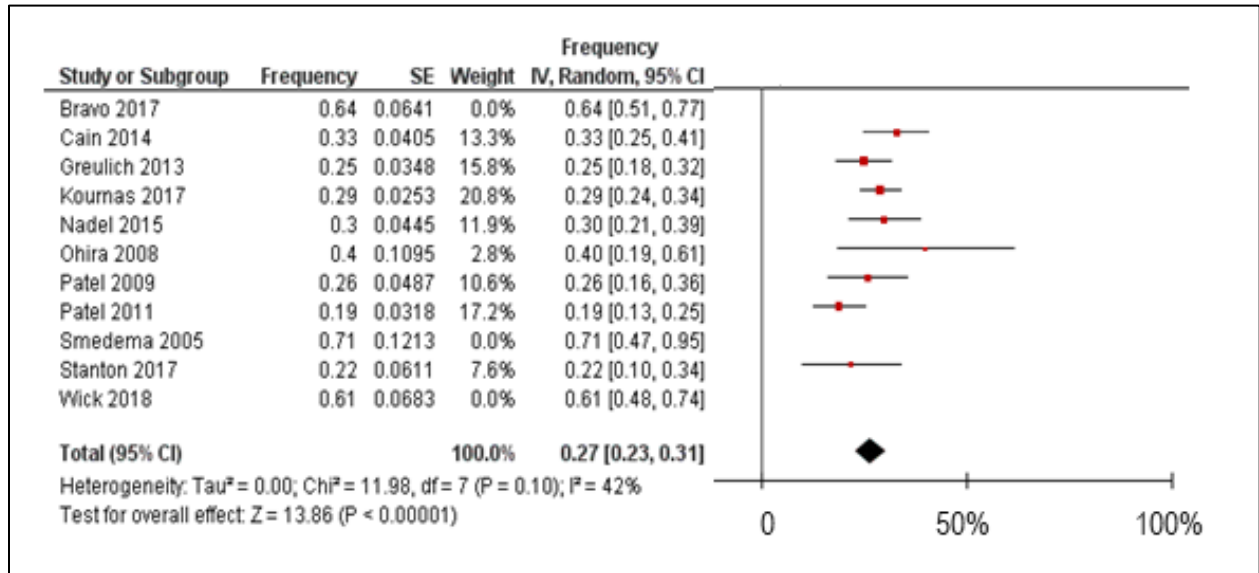

cMRI- Diagnosis of cardiac sarcoidosis

w/ outliers - JMHW

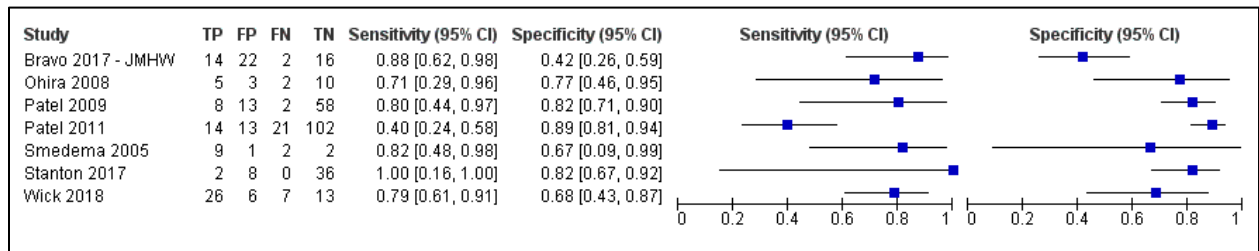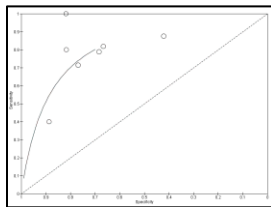

w/o outliers - JMHW

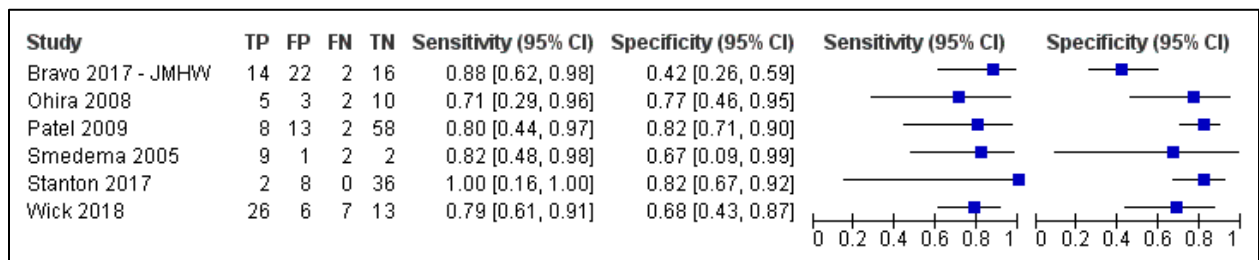

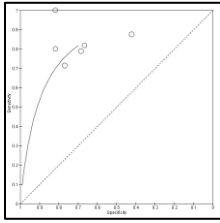

HRS

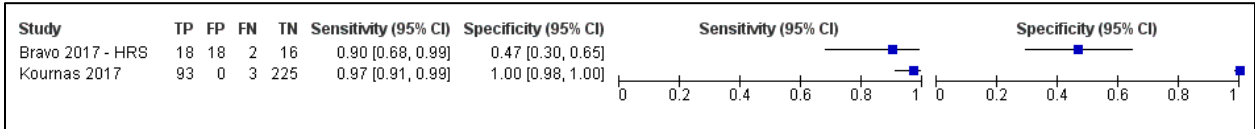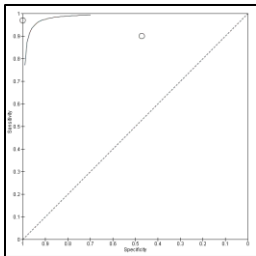

cMRI- Overall mortality

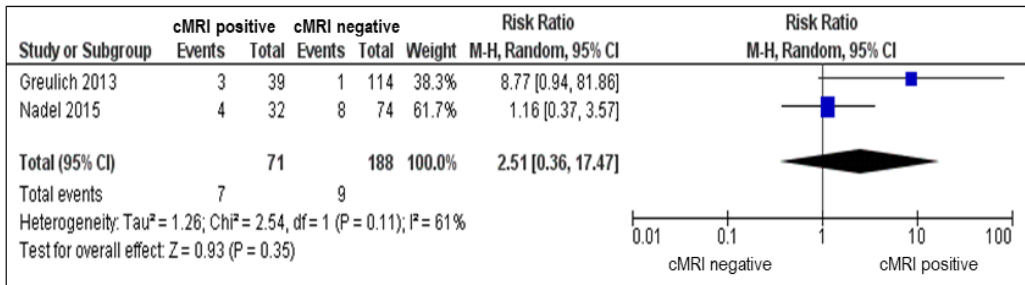

cMRI- Cardiac mortality

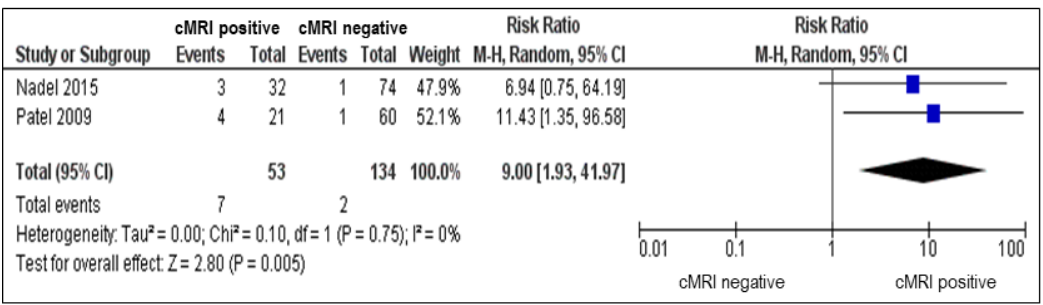

cMRI- Ventricular arrhythmias (outliers included)

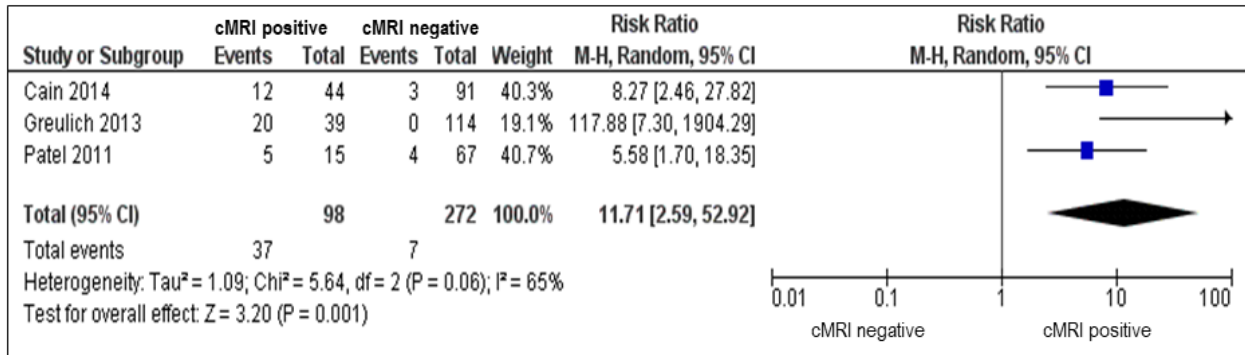

PET- Prevalence of abnormal PET scans (outliers included)

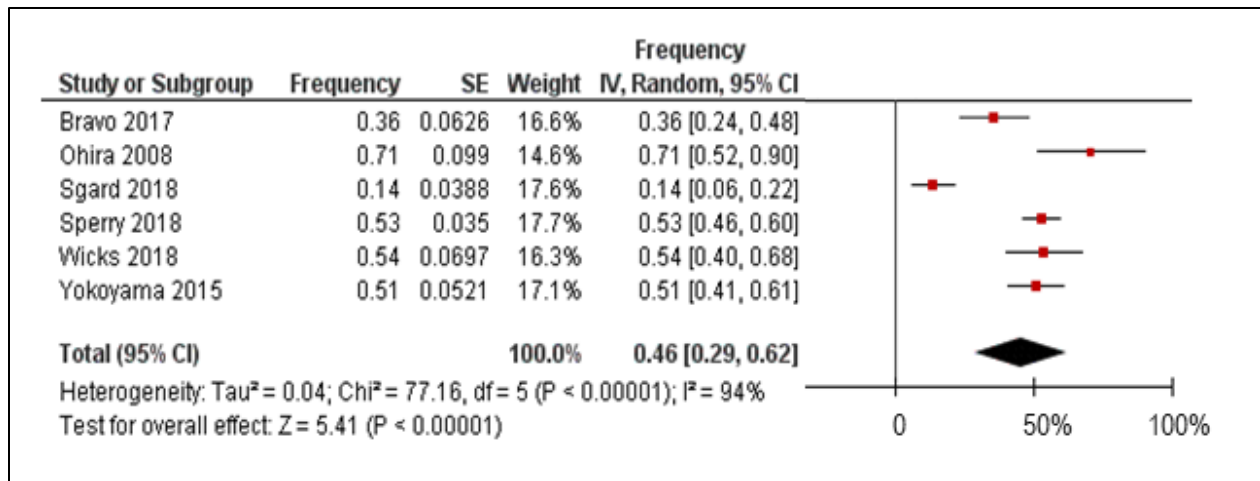

PET- Prevalence of abnormal PET scans (outliers excluded)

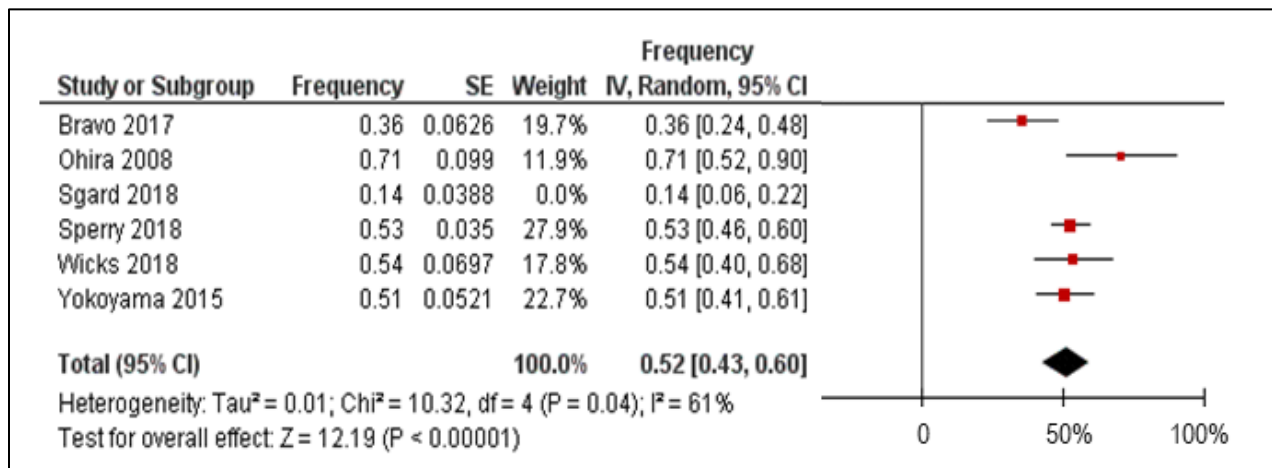

PET- Diagnosis of cardiac sarcoidosis

w/ outliers - JMHW

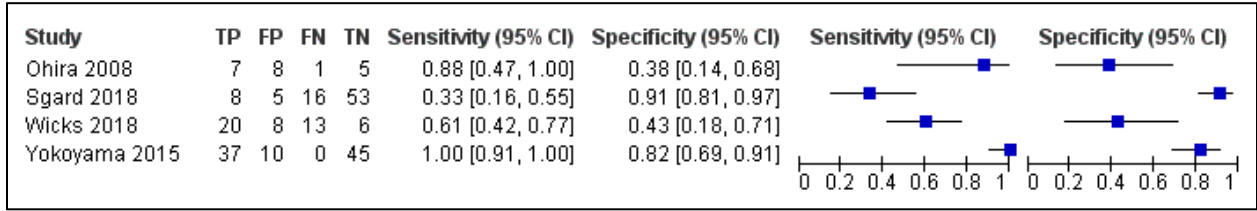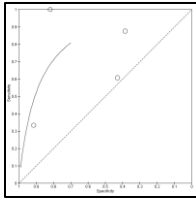

w/o outliers – JMHW

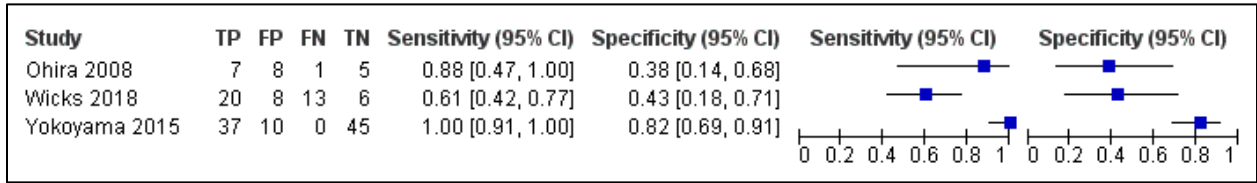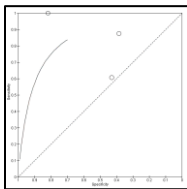

TTE- prevalence of abnormal TTE

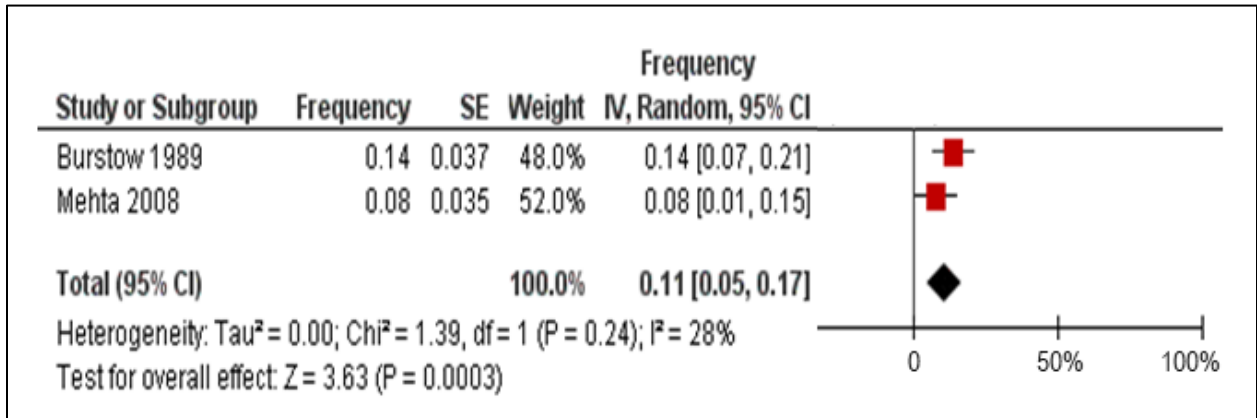

## Evidence profiles

### cMRI evidence profile

#### Bibliography:

1. Smedema et al. Cardiac involvement in patients with pulmonary sarcoidosis assessed at two university medical centers in the Netherlands. *Chest* 2005; 128: 30-5.
2. Ohira et al. Myocardial imaging with 18F-fluoro-2-deoxyglucose positron emission tomography and magnetic resonance imaging in sarcoidosis. *Eur J Nuc Med and Mol Imag* 2008; 35: 933-41.
3. Patel et al. Detection of myocardial damage in patients with sarcoidosis. *Circulation* 2009. 120: 1969-77.
4. Patel et al. Myocardial damage in patients with sarcoidosis and preserved left ventricular systolic function: an observational study. *Eur J Heart Fail* 2011; 13: 1231-7.
5. Greulich et al. CMR imaging predicts death and other adverse events in suspected cardiac sarcoidosis. *ACC Cardiovasc Imaging* 2013; 6L 501-11.
6. Cain et al. Cardiac sarcoidosis detected by late gadolinium enhancement and prevalence of atrial arrhythmias. *Am J Cardiol* 2014; 113: 1556-60.
7. Kournas et al. Complementary Role of CMR to Conventional Screening in the Diagnosis and Prognosis of Cardiac Sarcoidosis. *JACC Cardiovasc Imaging* 2017; 10: 1437-1447.
8. Stanton et al. The Utility of Cardiac Magnetic Resonance Imaging in the Diagnosis of Cardiac Sarcoidosis. *Heart Lung Circ* 2017; 26: 1191-1199.
9. Bravo, P. E et al. Risk assessment of patients with clinical manifestations of cardiac sarcoidosis with positron emission tomography and magnetic resonance imaging. *Int J Cardiol* 2017; 241: 457-462.
10. Nadel et al. Late gadolinium enhancement identified with cardiac magnetic resonance imaging in sarcoidosis patients is associated with long-term ventricular arrhythmia and sudden cardiac death. *Eur Heart J Cardiovasc Imaging* 2015; 16: 634-41.
11. Wicks et al. Diagnostic accuracy and prognostic value of simultaneous hybrid 18F-fluorodeoxyglucose positron emission tomography/magnetic resonance imaging in cardiac sarcoidosis. *Eur Heart J Cardiovasc Imaging* 2018. 19: 757-767.

| Quality assessment                      |                       |                      |                      |                      |                      |       | Summary of findings                                                                          |                 |                                 |                                                           | Quality          | Importance |
|-----------------------------------------|-----------------------|----------------------|----------------------|----------------------|----------------------|-------|----------------------------------------------------------------------------------------------|-----------------|---------------------------------|-----------------------------------------------------------|------------------|------------|
| No of studies                           | Design                | Risk of bias         | Inconsistency        | Indirectness         | Imprecision          | Other | Patients                                                                                     |                 | Effects                         |                                                           |                  |            |
|                                         |                       |                      |                      |                      |                      |       | Abnl. cMRI                                                                                   | Nml. cMRI       | Relative                        | Absolute                                                  |                  |            |
| <b>Frequency of abnormal cMRI (%)</b>   |                       |                      |                      |                      |                      |       |                                                                                              |                 |                                 |                                                           |                  |            |
| 11 <sup>1</sup>                         | case series           | serious <sup>2</sup> | serious <sup>3</sup> | serious <sup>4</sup> | serious <sup>5</sup> | none  | 27% <sup>6</sup> ,<br>95% CI<br>23-31%                                                       | N/A             | N/A                             | N/A                                                       | ⊕○○○<br>VERY LOW | TBD        |
| <b>Diagnosis of cardiac sarcoidosis</b> |                       |                      |                      |                      |                      |       |                                                                                              |                 |                                 |                                                           |                  |            |
| 8 <sup>7</sup>                          | accuracy studies      | serious <sup>8</sup> | serious <sup>3</sup> | serious <sup>4</sup> | serious <sup>5</sup> | none  | Sensitivity- 68% (95 CI 59-76%) <sup>9</sup><br>Specificity- 78% (95 CI 73-82%) <sup>9</sup> |                 |                                 |                                                           | ⊕○○○<br>VERY LOW | TBD        |
| <b>Overall mortality</b>                |                       |                      |                      |                      |                      |       |                                                                                              |                 |                                 |                                                           |                  |            |
| 2 <sup>10</sup>                         | observational studies | serious <sup>2</sup> | serious <sup>3</sup> | serious <sup>4</sup> | serious <sup>5</sup> | none  | 7/71<br>(9.9%)                                                                               | 9/190<br>(4.7%) | RR 2.54<br>95% CI<br>0.38-17.16 | 51 more<br>per 1000<br>(from 13<br>fewer to<br>145 more)  | ⊕○○○<br>VERY LOW | TBD        |
| <b>Cardiac mortality</b>                |                       |                      |                      |                      |                      |       |                                                                                              |                 |                                 |                                                           |                  |            |
| 2 <sup>11</sup>                         | observational studies | serious <sup>2</sup> | none                 | serious <sup>4</sup> | serious <sup>5</sup> | none  | 7/53<br>(13%)                                                                                | 2/136<br>(1.5%) | RR 9.00<br>95% CI<br>1.93-41.97 | 117 more<br>per 1000<br>(from 41<br>more to<br>234 more)  | ⊕○○○<br>VERY LOW | TBD        |
| <b>Aborted sudden cardiac death</b>     |                       |                      |                      |                      |                      |       |                                                                                              |                 |                                 |                                                           |                  |            |
| 1 <sup>12</sup>                         | observational studies | serious <sup>8</sup> | none                 | serious <sup>4</sup> | serious <sup>5</sup> | none  | 11/39<br>(28%)                                                                               | 0/114<br>(0%)   | Not estimable                   | 282 more<br>per 1000<br>(from 161<br>more to<br>438 more) | ⊕○○○<br>VERY LOW | TBD        |

| Ventricular arrhythmias                                                                            |                       |                      |      |                      |                      |      |             |              |                               |                                               |                  |     |
|----------------------------------------------------------------------------------------------------|-----------------------|----------------------|------|----------------------|----------------------|------|-------------|--------------|-------------------------------|-----------------------------------------------|------------------|-----|
| 3 <sup>13</sup>                                                                                    | observational studies | serious <sup>8</sup> | none | serious <sup>4</sup> | serious <sup>5</sup> | none | 37/98 (38%) | 7/272 (3.6%) | RR 11.71<br>95% CI 2.59-52.9  | 352 more per 1000 (from 259 more to 452 more) | ⊕○○○<br>VERY LOW | TBD |
| Major adverse cardiac events (sustained VT, Ventricular Fibrillation, AICD shock, all-cause death) |                       |                      |      |                      |                      |      |             |              |                               |                                               |                  |     |
| 3 <sup>14</sup>                                                                                    | observational studies | serious <sup>8</sup> | none | serious <sup>4</sup> | serious <sup>5</sup> | none | -           | -            | HR 10.63,<br>95% CI 1.4-80.78 | ⊕○○○<br>VERY LOW                              | TBD              |     |
|                                                                                                    |                       |                      |      |                      |                      |      |             |              | RR 12.5<br>95% CI 1.35-116.18 |                                               |                  |     |
|                                                                                                    |                       |                      |      |                      |                      |      |             |              | RR 8.33<br>95% CI 1.18-58.51  |                                               |                  |     |
| Diastolic heart failure                                                                            |                       |                      |      |                      |                      |      |             |              |                               |                                               |                  |     |
| 1 <sup>15</sup>                                                                                    | observational studies | serious <sup>8</sup> | none | serious <sup>4</sup> | serious <sup>5</sup> | none | 18/27 (67%) | 41/123 (33%) | RR 2.0<br>95% CI 1.39-2.88    | 499 more per 1000 (from 126 more to 499 more) | ⊕○○○<br>VERY LOW | TBD |
| All heart failure                                                                                  |                       |                      |      |                      |                      |      |             |              |                               |                                               |                  |     |
| 1 <sup>16</sup>                                                                                    | observational studies | serious <sup>8</sup> | none | serious <sup>4</sup> | serious <sup>5</sup> | none | 15/32 (47%) | 3/76 (4%)    | RR 11.88<br>95% CI 3.69-38.21 | 429 more per 1000 (from 254 more to 598 more) | ⊕○○○<br>VERY LOW | TBD |
| Supraventricular arrhythmias                                                                       |                       |                      |      |                      |                      |      |             |              |                               |                                               |                  |     |
| 1 <sup>17</sup>                                                                                    | observational studies | serious <sup>8</sup> | none | serious <sup>4</sup> | serious <sup>5</sup> | none | 16/44 (36%) | 11/91 (12%)  | RR 3.01<br>95% CI 1.53-5.93   | 243 more per 1000 (from 92 more to 399 more)  | ⊕○○○<br>VERY LOW | TBD |
| Complete heart block                                                                               |                       |                      |      |                      |                      |      |             |              |                               |                                               |                  |     |
| 1 <sup>17</sup>                                                                                    | observational studies | serious <sup>8</sup> | none | serious <sup>4</sup> | serious <sup>5</sup> | none | 4/32 (12%)  | 1/76 (1.4%)  | RR 9.5<br>95% CI 1.10-81.72   | 112 more per 1000 (from 17 more to 268 more)  | ⊕○○○<br>VERY LOW | TBD |
| Pulmonary hypertension                                                                             |                       |                      |      |                      |                      |      |             |              |                               |                                               |                  |     |
| 1 <sup>16</sup>                                                                                    | observational studies | serious <sup>8</sup> | none | serious <sup>4</sup> | serious <sup>5</sup> | none | 8/32 (25%)  | 6/76 (8%)    | RR 3.17<br>95% CI 1.19-8.39   | 171 more per 1000 (from 27 more to 347 more)  | ⊕○○○<br>VERY LOW | TBD |

**Footnotes:**

- <sup>1</sup> All studies.
- <sup>2</sup> Many studies didn't enroll consecutive patients; therefore, there was a risk of selection bias. Can't eliminate confounding bias.
- <sup>3</sup> High I<sup>2</sup> statistic.
- <sup>4</sup> The question is about patients with suspected cardiac sarcoidosis, but many studies included patients with and without cardiac symptoms.
- <sup>5</sup> Low optimum information size (most studies had <200 patients) and wide confidence intervals.
- <sup>6</sup> After removal of Smedema, Bravo, and Wick as outliers
- <sup>7</sup> Smedema, Ohira, Patel, Patel, Kouranos, Stanton, Bravo, and Wisk.
- <sup>8</sup> Can't eliminate confounding bias.
- <sup>9</sup> After removal of Patel as an outlier
- <sup>10</sup> Greulich and Nadel.
- <sup>11</sup> Patel and Nadel.
- <sup>12</sup> Greulich.
- <sup>13</sup> Patel, Greulich, and Cain.
- <sup>14</sup> Bravo, Wicks, and Nadel.

<sup>15</sup> Patel.

<sup>16</sup> Nadel.

<sup>17</sup> Cain.

## PET evidence profile

### Bibliography:

1. Yokoyama, R et al. Quantitative analysis of myocardial 18F-fluorodeoxyglucose uptake by PET/CT for detection of cardiac sarcoidosis. *Int J Cardiol* 2015 195: 180–187.
2. Bravo, P. E et al. Risk assessment of patients with clinical manifestations of cardiac sarcoidosis with positron emission tomography and magnetic resonance imaging. *Int J Cardiol* 2017; 241: 457–462.
3. Sperry, BW et al. Prognostic Impact of Extent, Severity, and Heterogeneity of Abnormalities on 18F-FDG PET Scans for Suspected Cardiac Sarcoidosis. *JACC. Cardiovascular Imaging*, 2018 11: 336–345.
4. Sgard, B et al. Evaluation of FDG PET combined with cardiac MRI for the diagnosis and therapeutic monitoring of cardiac sarcoidosis. *Clin Radiol* 2018; 1–10.
5. Wicks et al. Diagnostic accuracy and prognostic value of simultaneous hybrid 18F-fluorodeoxyglucose positron emission tomography/magnetic resonance imaging in cardiac sarcoidosis. *Eur Heart J Cardiovasc Imaging* 2018. 19: 757-767.
6. Ohira et al. Myocardial imaging with 18F-fluoro-2-deoxyglucose positron emission tomography and magnetic resonance imaging in sarcoidosis. *Eur J Nuc Med and Mol Imag* 2008; 35: 933-41.

| Quality assessment                                                                                        |                       |                      |                      |                      |                      |       | Summary of findings                                                                            |           |                                           |                  | Quality          | Importance |
|-----------------------------------------------------------------------------------------------------------|-----------------------|----------------------|----------------------|----------------------|----------------------|-------|------------------------------------------------------------------------------------------------|-----------|-------------------------------------------|------------------|------------------|------------|
| No of studies                                                                                             | Design                | Risk of bias         | Inconsistency        | Indirectness         | Imprecision          | Other | Patients                                                                                       |           | Effects                                   |                  |                  |            |
|                                                                                                           |                       |                      |                      |                      |                      |       | Abnl. cMRI                                                                                     | Nml. cMRI | Relative                                  | Absolute         |                  |            |
| <b>Frequency of abnormal PET (%)</b>                                                                      |                       |                      |                      |                      |                      |       |                                                                                                |           |                                           |                  |                  |            |
| 6 <sup>1</sup>                                                                                            | case series           | serious <sup>2</sup> | serious <sup>3</sup> | serious <sup>4</sup> | serious <sup>5</sup> | none  | 53% <sup>6</sup><br>95% CI<br>46-61%                                                           | -         | -                                         | -                | ⊕○○○<br>VERY LOW | TBD        |
| <b>Diagnosis of cardiac sarcoidosis</b>                                                                   |                       |                      |                      |                      |                      |       |                                                                                                |           |                                           |                  |                  |            |
| 5 <sup>7</sup>                                                                                            | accuracy studies      | serious <sup>8</sup> | none                 | serious <sup>4</sup> | serious <sup>5</sup> | none  | Sensitivity = 80%, 95% CI 73-86% <sup>6</sup><br>Specificity = 68%, 95% CI 59-75% <sup>6</sup> |           |                                           |                  | ⊕○○○<br>VERY LOW | TBD        |
| <b>Overall mortality</b>                                                                                  |                       |                      |                      |                      |                      |       |                                                                                                |           |                                           |                  |                  |            |
| 1 <sup>9</sup>                                                                                            | observational studies | serious <sup>8</sup> | none                 | serious <sup>4</sup> | serious <sup>5</sup> | none  | -                                                                                              | -         | HR 1.33<br>95% CI 0.68-2.26               |                  | ⊕○○○<br>VERY LOW | TBD        |
| <b>Major adverse cardiac events (sustained VT, Ventricular Fibrillation, AICD shock, all-cause death)</b> |                       |                      |                      |                      |                      |       |                                                                                                |           |                                           |                  |                  |            |
| 4 <sup>10</sup>                                                                                           | observational studies | serious <sup>2</sup> | none                 | serious <sup>4</sup> | serious <sup>5</sup> | none  | -                                                                                              | -         | HR 3.30 <sup>11</sup><br>95% CI 1.1-10.0  | ⊕○○○<br>VERY LOW | TBD              |            |
|                                                                                                           |                       |                      |                      |                      |                      |       |                                                                                                |           | HR 2.29 <sup>12</sup><br>95% CI 0.72-7.33 |                  |                  |            |
|                                                                                                           |                       |                      |                      |                      |                      |       |                                                                                                |           | RR 2.0 <sup>9</sup><br>95% CI 1.26-3.17   |                  |                  |            |

### Footnotes:

<sup>1</sup> All studies.

<sup>2</sup> One study didn't enroll consecutive patients; therefore, there was a risk of selection bias. Can't eliminate confounding bias.

<sup>3</sup> High I<sup>2</sup> statistic.

<sup>4</sup> The question is about patients with suspected cardiac sarcoidosis, but many studies included patients with and without cardiac symptoms.

<sup>5</sup> Low optimum information size (most studies had <200 patients) and wide confidence intervals.

<sup>6</sup> Eliminated Sgard as an outlier.

<sup>7</sup> Ohira, Yokoyama, Sperry, Sgard, and Wicks.

<sup>8</sup> Can't eliminate confounding bias.

<sup>9</sup> Sperry.

<sup>10</sup> Bravo, Sperry, Wicks, and Sgard.

<sup>11</sup> Bravo.

<sup>12</sup> Wicks.

## Echocardiography profile



**Bibliography:**

3. Mehta D, Lubitz SA, Frankel Z, Wisnivesky JP, Einstein AJ, Goldman M, Machac J, Teirstein A, 2008. Cardiac involvement in patients with sarcoidosis: diagnostic and prognostic value of outpatient testing. Chest 133: 1426-1435.
4. Burstow, et al. Two-dimensional echocardiographic findings in systemic sarcoidosis. Am J Cardiol 1989; 63(7):478-482.

| Quality assessment                                |                     |                      |                      |                      |                      |       | Summary of findings                                                |                |                               |                                                          | Quality          | Importance |
|---------------------------------------------------|---------------------|----------------------|----------------------|----------------------|----------------------|-------|--------------------------------------------------------------------|----------------|-------------------------------|----------------------------------------------------------|------------------|------------|
| No of studies                                     | Design              | Risk of bias         | Inconsistency        | Indirectness         | Imprecision          | Other | Patients                                                           |                | Effects                       |                                                          |                  |            |
|                                                   |                     |                      |                      |                      |                      |       | Abnl. TTE                                                          | Nml. TTE       | Relative                      | Absolute                                                 |                  |            |
| <b>Frequency of abnormal echocardiography (%)</b> |                     |                      |                      |                      |                      |       |                                                                    |                |                               |                                                          |                  |            |
| 2 <sup>1</sup>                                    | case series         | serious <sup>2</sup> | serious <sup>3</sup> | serious <sup>4</sup> | serious <sup>5</sup> | none  | 11%<br>95% CI<br>5-17%                                             | -              | -                             | -                                                        | ⊕○○○<br>VERY LOW | TBD        |
| <b>Diagnosis of cardiac sarcoidosis</b>           |                     |                      |                      |                      |                      |       |                                                                    |                |                               |                                                          |                  |            |
| 1 <sup>6</sup>                                    | accuracy study      | none                 | none                 | serious <sup>4</sup> | serious <sup>5</sup> | none  | Sensitivity= 25%, 95% CI 10-47%<br>Specificity= 97%, 95% CI 86-99% |                |                               |                                                          | ⊕○○○<br>VERY LOW | TBD        |
| <b>Development of conduction abnormalities</b>    |                     |                      |                      |                      |                      |       |                                                                    |                |                               |                                                          |                  |            |
| 1 <sup>7</sup>                                    | observational study | serious <sup>2</sup> | none                 | serious <sup>4</sup> | serious <sup>5</sup> | none  | 7/12<br>(58%)                                                      | 17/76<br>(22%) | RR 2.6<br>95% CI<br>1.38-4.92 | 360 more<br>per 1000<br>(from 76<br>more to<br>597 more) | ⊕○○○<br>VERY LOW | TBD        |

**Footnotes:**

- <sup>1</sup> All studies.
- <sup>2</sup> Can't exclude confounding bias.
- <sup>3</sup> High I<sup>2</sup> statistic.
- <sup>4</sup> The question is about patients with suspected cardiac sarcoidosis, but many studies included patients with and without cardiac symptoms.
- <sup>5</sup> Low optimum information size (<200 patients) and wide confidence intervals.
- <sup>6</sup> Mehta.
- <sup>7</sup> Burstow.

**QUESTION #10: Should patients with sarcoidosis who are suspected of having pulmonary hypertension undergo transthoracic echocardiography?**

**Search strategy**

| #  | Searches                                                      |
|----|---------------------------------------------------------------|
| 1  | exp sarcoidosis/                                              |
| 2  | sarcoidosis/                                                  |
| 3  | sarcoidosis/ or sarcoidosis, pulmonary/ or uveoparotid fever/ |
| 4  | sarcoid\$.mp.                                                 |
| 5  | (besnier adj boeck\$).tw.                                     |
| 6  | (boeck\$ adj (disease or sarcoid)).tw.                        |
| 7  | (schaumann\$ adj (disease or syndrome)).tw.                   |
| 8  | uveoparoti\$.tw.                                              |
| 9  | (benign\$ adj lymphogranuloma\$).tw.                          |
| 10 | ((junging or heerfordt or lofgren) adj syndrome).tw.          |

- 11 neurosarcoidosis.tw.
- 12 (lupus adj pernio).tw.
- 13 (idiopathic adj3 inflammat\$ adj3 granulomat\$).tw.
- 14 or/1-13 [all sarcoidosis]
- 15 pulmonary hypertension/
- 16 ((pulmonary or lung) adj3 hypertensi\$).mp.  
(pulmonary adj2 (heart or vascular or arter\$ or cardiac) adj2
- 17 disease\$).mp.
- 18 (corpulmonale or cor pulmonale).mp.
- 19 15 or 16 or 17 or 18 [PH]
- 20 14 and 19 [sarcoid and PH]
- 21 exp Echocardiography/
- 22 (echocardiogra\$ or echo cardiogra\$).mp.
- 23 ((heart or cardi\$) adj echogra\$).mp.
- 24 21 or 22 or 23 [echo]
- 25 19 and 24 [PH and echo]
- 26 20 and 24 [Sarcoidosis and PH and echo]
- 27 14 and 24 [sarcoid and echo]

**Flow of information**

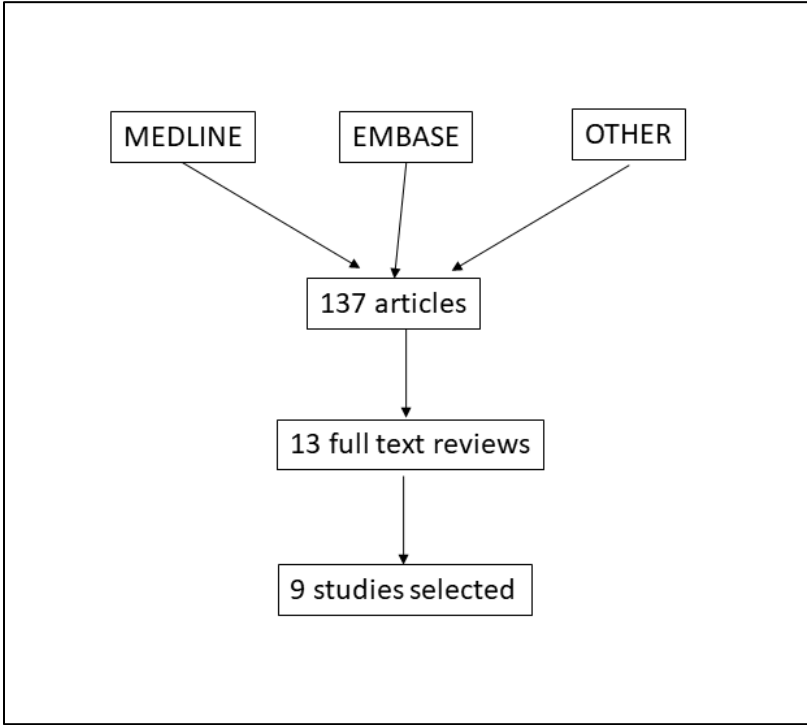

**Selected studies with outcomes**

| Study                      | Definition of PH                                             | Frequency of echo suggestive of PH       | Confirmation by right heart catheterization | Severity of lung disease (FVC % predicted) (means ± SDs) |             |
|----------------------------|--------------------------------------------------------------|------------------------------------------|---------------------------------------------|----------------------------------------------------------|-------------|
|                            |                                                              |                                          |                                             | PH                                                       | No PH       |
| Alhamad 2010               | estimated RVSP ≥ 40 mmHg                                     | 20/96 (21%)                              | 5/5 (100%)                                  | 56.9 ± 21.3                                              | 79.5 ± 20.9 |
| Handa 2006                 | estimated sPAP ≥ 40 mmHg                                     | 12/212 (6%)                              | NR                                          | 88 ± 24                                                  | 106 ± 18    |
| Joyce 2016                 | estimated RV global longitudinal peak systolic strain ≥ -19% | 41/88 (47%)                              | NR                                          | NR                                                       | NR          |
| Liu 2017                   | estimated sPAP ≥ 40 mmHg                                     | 34/72 (47%)                              | 34/34 (100%)                                | NR                                                       | NR          |
| Maimon 2013                | estimated RV SP ≥ 40 mmHg                                    | 36/127 (28%)                             | 1/3 (33%)                                   | 90 ± 20                                                  | 93 ± 15     |
| Pabst 2013                 | estimated SPAP > 50 mmHg                                     | 23/211 (21%)                             | 5/10 (50%)                                  | NR                                                       | NR          |
| Patel 2016                 | estimated SPAP > 35 mmHg                                     | 8/50 (16%)                               | NR                                          | NR                                                       | NR          |
| Rapti 2013                 | estimated sPAP ≥ 40 mmHg                                     | 37/313 (12%)                             | 9/12 (75%)                                  | 79.3 ± 26.8                                              | 96.2 ± 16.8 |
| Sulica 2005                | estimated RVSP of at least 40 mm Hg,                         | 54/106 (51%)                             | 3/5 (60%)                                   | 54 ± 2.4                                                 | 64 ± 2.8    |
| <i>Pooled (weighted)</i>   | <i>Not applicable</i>                                        | <i>29%</i><br><i>(95% CI 20% to 39%)</i> | <i>Not estimable</i>                        | <i>MD -16.5%</i><br><i>(95% CI -22.4% to -10.6%)</i>     |             |
| <i>Pooled (unweighted)</i> |                                                              | <i>21%</i><br><i>(95% CI 19-23%)</i>     | <i>78%</i><br><i>(95% CI 67% to 86%)</i>    | <i>Not estimable</i>                                     |             |
| <i>Median (range)</i>      |                                                              | <i>21%</i><br><i>(6% to 51%)</i>         | <i>68%</i><br><i>(33% to 100%)</i>          | <i>-16.9%</i><br><i>(-3% to -22.6%)</i>                  |             |

NR= not reported.

## Forest plots

### Frequency of echo suggestive of PH

Initial

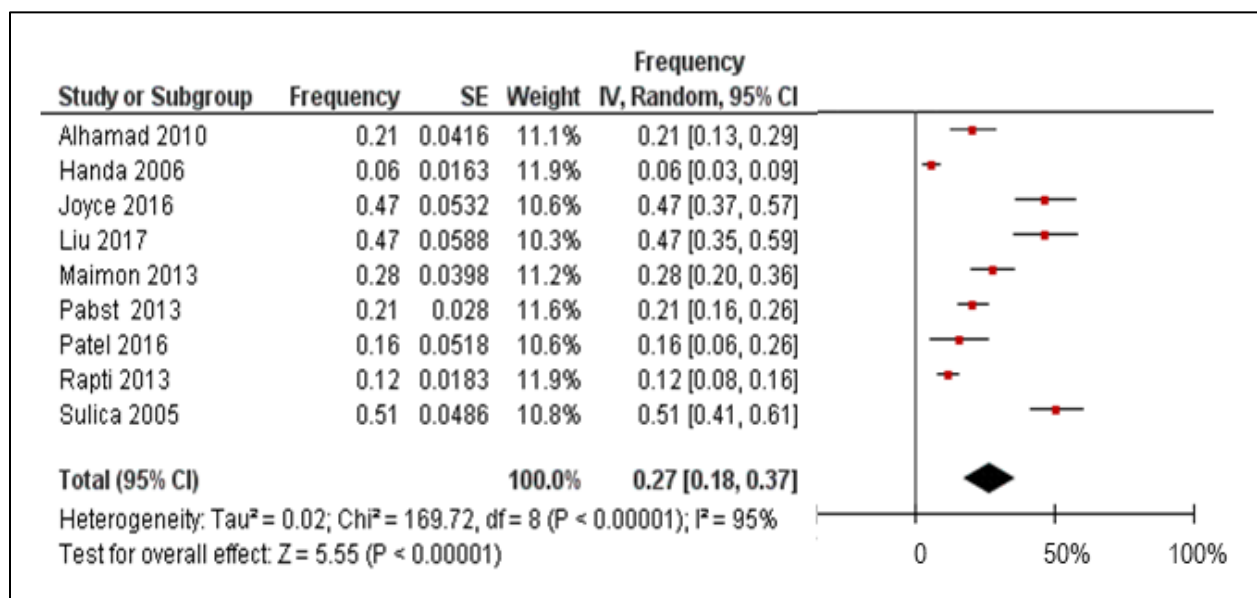

After removal of outliers

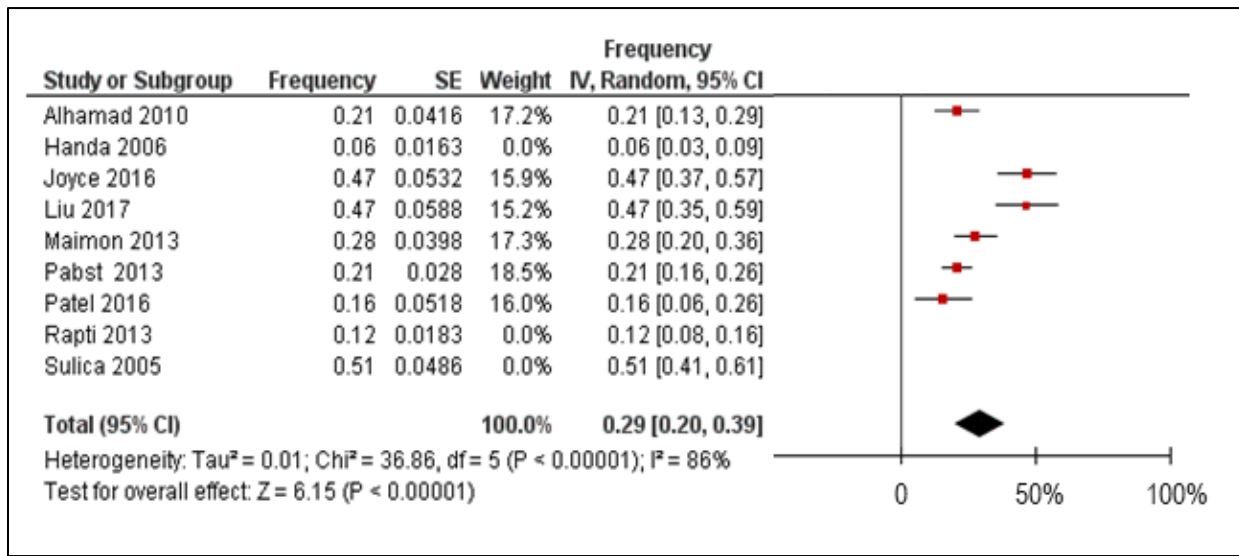

### Severity of lung disease among PH versus no PH

Initial

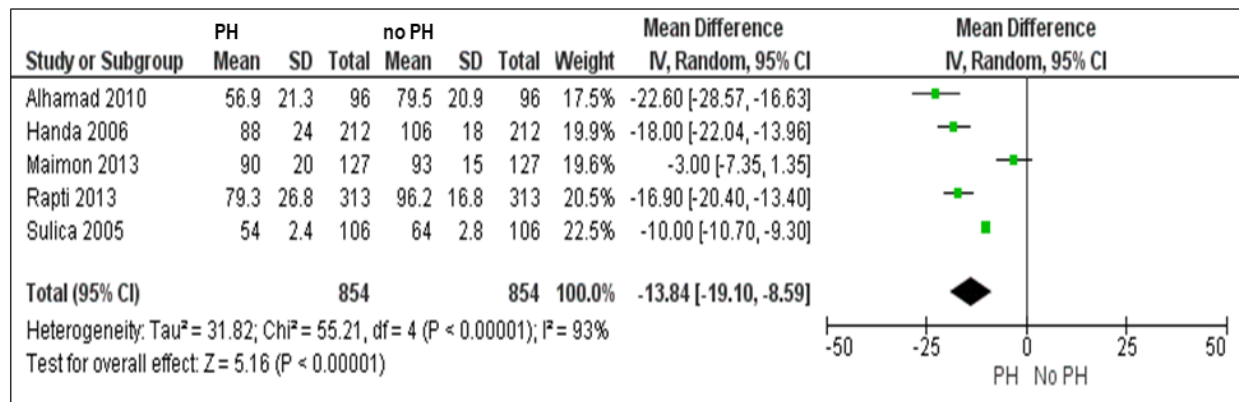

After removal of outliers

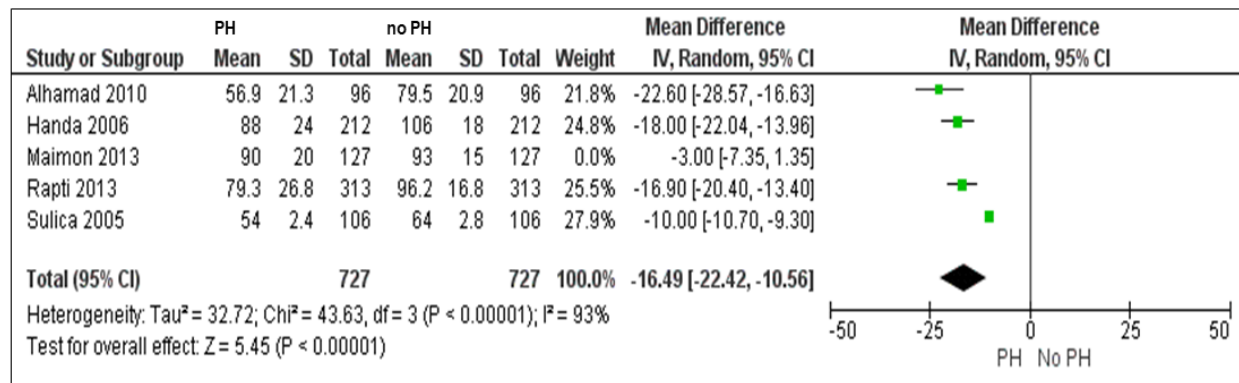

## Markov model

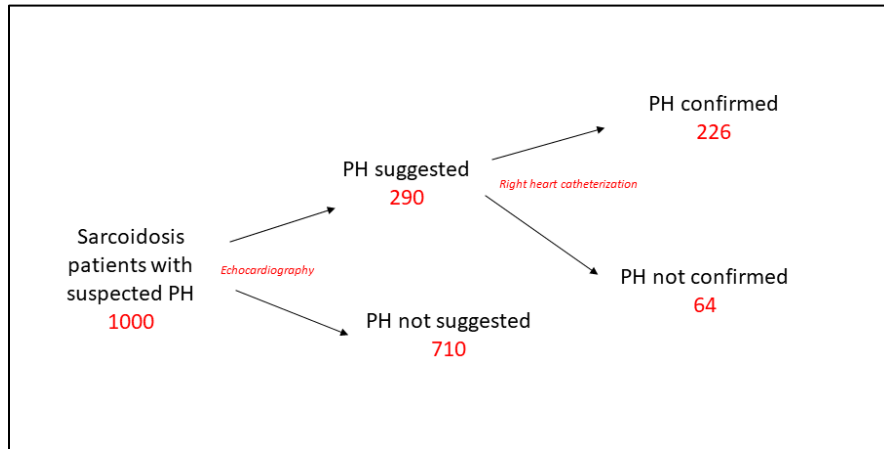

For every 1000 sarcoidosis patients who are suspected of having PH and undergo echocardiography, abnormalities suggestive of PH will be found in roughly 290 patients, approximately 226 of whom will have PH confirmed by right heart catheterization.

## Evidence profile

### Bibliography:

- Alhamad EH, et al. Sarcoidosis-associated pulmonary hypertension: Clinical features and outcomes in Arab patients. *Ann Thorac Med* 2010; 5(2):86-91.
- Handa T, et al. Incidence of pulmonary hypertension and its clinical relevance in patients with sarcoidosis. *CHEST* 2006; 129(5):1246-1252.
- Joyce E, et al. Prevalence and correlates of early right ventricular dysfunction in sarcoidosis and its association with outcome. *J Am Soc Echo* 2016; 29(9):871-878.
- Liu L, et al. Interventional therapy in sarcoidosis-associated pulmonary arterial stenosis and pulmonary hypertension. *Clin Respir J* 2017; 11(6):906-914.
- Maimon N, et al. Sarcoidosis-associated pulmonary hypertension in patients with near-normal lung function. *Int J Tuberc Lung Dis* 2013; 17(3):406-411.
- Pabst S, et al. Pulmonary arterial hypertension in patients with sarcoidosis: the Pulsar single center experience. *Adv Exp Med Biol* 2013; 755:299-305.
- Patel MB, et al. Right heart involvement in patients with sarcoidosis. *Echocardiogr* 2016; 33(5):734-741.
- Rapti A, et al. Elevated pulmonary arterial systolic pressure in patients with sarcoidosis: prevalence and risk factors. *Lung* 2013; 191(1):61-67.
- Sulica R, et al. Distinctive clinical, radiographic, and functional characteristics of patients with sarcoidosis-related pulmonary hypertension. *CHEST* 2005; 128(3):1483-1489.

| Quality assessment                                           |             |                      |                      |                   |                      |                      | Effect                     | Quality          | Importance |
|--------------------------------------------------------------|-------------|----------------------|----------------------|-------------------|----------------------|----------------------|----------------------------|------------------|------------|
| No of studies                                                | Design      | Risk of bias         | Inconsistency        | Indirectness      | Imprecision          | Other considerations |                            |                  |            |
| <b>Frequency of echocardiography suggestive of PH (%)</b>    |             |                      |                      |                   |                      |                      |                            |                  |            |
| 9 <sup>1</sup>                                               | case series | serious <sup>2</sup> | serious <sup>3</sup> | none <sup>4</sup> | serious <sup>5</sup> | none                 | 29%<br>(95% CI 20% to 39%) | ⊕○○○<br>VERY LOW | TBD        |
| <b>Confirmation of PH by right heart catheterization (%)</b> |             |                      |                      |                   |                      |                      |                            |                  |            |
| 6 <sup>6</sup>                                               | case series | serious <sup>2</sup> | serious <sup>3</sup> | none <sup>4</sup> | serious <sup>7</sup> | none                 | 78%<br>(95% 67% to 86%)    | ⊕○○○<br>VERY LOW | TBD        |
| <b>Initiation of anti-PH treatment (%)</b>                   |             |                      |                      |                   |                      |                      |                            |                  |            |

|                          |   |   |   |   |   |   |   |   |     |
|--------------------------|---|---|---|---|---|---|---|---|-----|
| 0                        | - | - | - | - | - | - | - | - | TBD |
| <b>Mortality</b>         |   |   |   |   |   |   |   |   |     |
| 0                        | - | - | - | - | - | - | - | - | TBD |
| <b>Exercise capacity</b> |   |   |   |   |   |   |   |   |     |
| 0                        | - | - | - | - | - | - | - | - | TBD |
| <b>Quality of life</b>   |   |   |   |   |   |   |   |   |     |
| 0                        | - | - | - | - | - | - | - | - | TBD |

**Footnotes:**

<sup>1</sup> All studies.

<sup>2</sup> Many were retrospective chart reviews; therefore, there was a risk of selection bias.

<sup>3</sup> When pooled by meta-analysis, the  $I^2 > 90\%$ ; thus, the median (range) are the primary outcomes for these outcomes rather than the pooled analyses. Also, the range is wide.

<sup>4</sup> The questions asks about sarcoidosis patients with suspected PH, but most studies did not state whether or not PH is suspected. Did not downgrade because difference minor.

<sup>5</sup> Four out of the nine studies are small, with <100 patients.

<sup>6</sup> Alhamad, Liu, Maimon, Pabst, Rapti, and Sulica.

<sup>7</sup> All of the studies are small, with <100 patients.
